# Supplementary material for: Switzerland-wide Neospora caninum seroprevalence in female cattle and identification of risk factors for infection
Source: Front Vet Sci. 2022 Nov 17;9:1059697. doi: 10.3389/fvets.2022.1059697 (PMC9714321; doi:10.3389/fvets.2022.1059697)
Supplement: Supplementary file 1 [file Data_Sheet_1.docx]

Switzerland-wide *Neospora caninum* seroprevalence in female cattle and identification of risk factors for infection

Diana S. Gliga1*, Walter Basso1, Flurin Ardüser2,4, Gaia Moore-Jones2,5, Gereon Schares3, Patrik Zanolari2†, Caroline F. Frey1

1Institute of Parasitology, Department of Infectious Diseases and Pathobiology, Vetsuisse Faculty, University of Bern, Bern, Switzerland

2Clinic for Ruminants, Vetsuisse Faculty, University of Bern, Bern, Switzerland

3Institute of Epidemiology, Friedrich-Loeffler-Institut, Federal Research Institute for Animal Health, Greifswald-Insel Riems, Germany

4Current affiliation: Gross- und Kleintierpraxis Lai, Lenzerheide, Switzerland

5Current affiliation: Amt für Veterinärwesen, Bern, Switzerland

*****Corresponding Author
diana.gliga@unibe.ch

Questionnaire survey for cattle farms in Switzerland

# 1. General information about owner and farm

## Owner: name, address, telephone number, e-mail

Farm: registration number; production type (dairy, beef, dairy+beef, other: …….)

Number of animals

Restocking: rearing of replacement heifers (yes/no), buying-in (yes/no), rearing of replacement heifers + buying-in (yes/no)

# 2. Information on bovine husbandry and bovine health

Type of husbandry:

stable and pen: tie-stall (yes/no), free stall (yes/no)

stable and local pasture: tie-stall (yes/no), free stall (yes/no)

alpine summer grazing (yes/no)

Type of water supply:

public supply water (yes/no)

private water source: groundwater (by water pump) or spring (yes/no)

pond/stream (yes/no)

other: …….

Feed for cattle:

pasture/ fresh grass (yes/no), hay (yes/no), grass silage (yes/no), corn silage (yes/no),

concentrated feed (yes/no), other: …….

Proportion of pasture in whole feed (if grazing):

<25%, 25 - 50%, or >50%

Storage of feed:

open (dog has access) (yes/no); closed (yes/no), how is it closed: …….

History of cattle abortion in the previous 5 years?

don't know

no

yes, how many: …….

- - if yes, was aborted material examined (yes/no)
    - if yes, were abortifacient pathogens detected? (yes/no)
      - if yes, which ones: *Neospora caninum* (yes/no), others: …….

# 3. Information on dog ownership

Have there been own dogs on the farm in the last 6 years? If so, tick affected years.

no

yes: 2021, 2020, 2019, 2018, 2017, 2016, 2015

- If yes:

Did your own farm dogs have access to: stable (yes/no), pasture (yes/no), feed storage (yes/no)?

Have there been puppies (≤6 months) on the farm in the last 4 years? (yes/no/don’t know)

Do foreign dogs (e.g., dogs of hikers) have access to: stable (yes/no), pasture (yes/no), feed storage (yes/no)?

What are the dogs fed with? canned/dry food (yes/no), leftovers (yes/no), raw meat (yes/no), dog hunts rodents/birds (yes/no)

# 4. Information on other animal species

Have you had problems with rodents (mice, rats) in the last 2 years? (yes/no)

Do you keep other animal species besides cattle (and dogs) on the farm? If so, which animal species and how many animals each?
