# Supplementary material for: Switzerland-wide Neospora caninum seroprevalence in female cattle and identification of risk factors for infection
Source: Front Vet Sci. 2022 Nov 17;9:1059697. doi: 10.3389/fvets.2022.1059697 (PMC9714321; doi:10.3389/fvets.2022.1059697)
Supplement: Supplementary file 2 [file Data_Sheet_2.xlsx]

## Sheet: dataset
Farm_ID	Sample_ID	Animal_serostatus	Farm_Serostatus	Age_in_years	Age_group	Breed	Canton	Cow_count_per_municipality	Cow_countPerSurfacekm2_per_municipality	Cow_countPer100Inhabitants_per_municipality	Dog_count_per_municipality	Dog_countPerSurfacekm2_per_municipality	Dog_countPer100Inhabitants_per_municipality	Production_type	Animal_count_per_farm	Herdsize	Restocking	Housing	Alpine_grazing	Water	Pasture_cutGrass	Hay	Grass_silage	Corn_silage	Concentrated_feed	%_pasture_whole_feed	Feed_storage	Abortion_History_5yeats	Count_Abortion_5years	Abortion_Diagnostics	Dogs_in_stable	Canned/dried_dogfood	Leftovers	Raw_meat	Mice_birds	Rodents	Other_animals
1	1_1	pos	pos	4	adult	BV	BE	70	12.7	627	593	28.1	5.1	beef	8	small	buying	Stable_Pasture	NA	public	1	1	1	0	0	25to50	open	don't_know	NA	0	0	0	0	0	0	1	1
1	1_2	neg	pos	15	adult	BV	BE	70	12.7	627	593	28.1	5.1	beef	8	small	buying	Stable_Pasture	NA	public	1	1	1	0	0	25to50	open	don't_know	NA	0	0	0	0	0	0	1	1
1	1_3	neg	pos	1	1y	LM	BE	70	12.7	627	593	28.1	5.1	beef	8	small	buying	Stable_Pasture	NA	public	1	1	1	0	0	25to50	open	don't_know	NA	0	0	0	0	0	0	1	1
1	1_4	pos	pos	3	adult	SF	BE	70	12.7	627	593	28.1	5.1	beef	8	small	buying	Stable_Pasture	NA	public	1	1	1	0	0	25to50	open	don't_know	NA	0	0	0	0	0	0	1	1
2	2_1	neg	neg	2	adult	SF	BE	60.3	7.3	355	1594	31.2	3.8	NA	NA	NA	NA	NA	NA	NA	NA	NA	NA	NA	NA	NA	NA	NA	NA	NA	NA	NA	NA	NA	NA	NA	NA
2	2_2	neg	neg	4	adult	SF	BE	60.3	7.3	355	1594	31.2	3.8	NA	NA	NA	NA	NA	NA	NA	NA	NA	NA	NA	NA	NA	NA	NA	NA	NA	NA	NA	NA	NA	NA	NA	NA
2	2_3	neg	neg	6	adult	RF	BE	60.3	7.3	355	1594	31.2	3.8	NA	NA	NA	NA	NA	NA	NA	NA	NA	NA	NA	NA	NA	NA	NA	NA	NA	NA	NA	NA	NA	NA	NA	NA
2	2_4	neg	neg	3	adult	SI	BE	60.3	7.3	355	1594	31.2	3.8	NA	NA	NA	NA	NA	NA	NA	NA	NA	NA	NA	NA	NA	NA	NA	NA	NA	NA	NA	NA	NA	NA	NA	NA
3	3_1	neg	pos	5	adult	SF	BE	86.3	209.3	901	340	5.6	13.7	dairy+beef	20	small	heifer_rearing	Stable_Pen_Pasture	partly	public_ground_pond	1	1	0	0	1	>50	closed	1	3	0	0	0	0	0	0	0	1
3	3_2	pos	pos	4	adult	SF	BE	86.3	209.3	901	340	5.6	13.7	dairy+beef	20	small	heifer_rearing	Stable_Pen_Pasture	partly	public_ground_pond	1	1	0	0	1	>50	closed	1	3	0	0	0	0	0	0	0	1
3	3_3	neg	pos	4	adult	RH	BE	86.3	209.3	901	340	5.6	13.7	dairy+beef	20	small	heifer_rearing	Stable_Pen_Pasture	partly	public_ground_pond	1	1	0	0	1	>50	closed	1	3	0	0	0	0	0	0	0	1
3	3_4	neg	pos	3	adult	SF	BE	86.3	209.3	901	340	5.6	13.7	dairy+beef	20	small	heifer_rearing	Stable_Pen_Pasture	partly	public_ground_pond	1	1	0	0	1	>50	closed	1	3	0	0	0	0	0	0	0	1
3	3_5	neg	pos	7	adult	SF	BE	86.3	209.3	901	340	5.6	13.7	dairy+beef	20	small	heifer_rearing	Stable_Pen_Pasture	partly	public_ground_pond	1	1	0	0	1	>50	closed	1	3	0	0	0	0	0	0	0	1
4	4_1	neg	pos	2	adult	SF	BE	51.7	17	413	191	27.6	9.1	NA	NA	NA	NA	NA	NA	NA	NA	NA	NA	NA	NA	NA	NA	NA	NA	NA	NA	NA	NA	NA	NA	NA	NA
4	4_2	neg	pos	8	adult	SF	BE	51.7	17	413	191	27.6	9.1	NA	NA	NA	NA	NA	NA	NA	NA	NA	NA	NA	NA	NA	NA	NA	NA	NA	NA	NA	NA	NA	NA	NA	NA
4	4_3	neg	pos	8	adult	RF	BE	51.7	17	413	191	27.6	9.1	NA	NA	NA	NA	NA	NA	NA	NA	NA	NA	NA	NA	NA	NA	NA	NA	NA	NA	NA	NA	NA	NA	NA	NA
4	4_4	pos	pos	1	1y	NO	BE	51.7	17	413	191	27.6	9.1	NA	NA	NA	NA	NA	NA	NA	NA	NA	NA	NA	NA	NA	NA	NA	NA	NA	NA	NA	NA	NA	NA	NA	NA
4	4_5	pos	pos	0	< 1y	NO	BE	51.7	17	413	191	27.6	9.1	NA	NA	NA	NA	NA	NA	NA	NA	NA	NA	NA	NA	NA	NA	NA	NA	NA	NA	NA	NA	NA	NA	NA	NA
5	5_1	neg	neg	6	adult	OB	BE	26.4	151.1	786	39	1.2	7.1	dairy	30	medium	heifer_rearing	Stable_Pen_Pasture	yes	ground	1	1	1	1	1	25to50	closed	1	5	0	1	1	0	0	0	1	1
5	5_2	neg	neg	8	adult	OB	BE	26.4	151.1	786	39	1.2	7.1	dairy	30	medium	heifer_rearing	Stable_Pen_Pasture	yes	ground	1	1	1	1	1	25to50	closed	1	5	0	1	1	0	0	0	1	1
5	5_3	neg	neg	3	adult	OB	BE	26.4	151.1	786	39	1.2	7.1	dairy	30	medium	heifer_rearing	Stable_Pen_Pasture	yes	ground	1	1	1	1	1	25to50	closed	1	5	0	1	1	0	0	0	1	1
5	5_4	neg	neg	3	adult	OB	BE	26.4	151.1	786	39	1.2	7.1	dairy	30	medium	heifer_rearing	Stable_Pen_Pasture	yes	ground	1	1	1	1	1	25to50	closed	1	5	0	1	1	0	0	0	1	1
5	5_5	neg	neg	3	adult	OB	BE	26.4	151.1	786	39	1.2	7.1	dairy	30	medium	heifer_rearing	Stable_Pen_Pasture	yes	ground	1	1	1	1	1	25to50	closed	1	5	0	1	1	0	0	0	1	1
6	6_1	neg	neg	2	adult	RH	BE	118.5	159.1	952	122	8.6	11.6	dairy+beef	27	medium	heifer_rearing	Stable_Pen_Pasture	no	public	1	1	1	1	1	>50	closed	1	3	1	1	1	1	0	0	0	1
6	6_2	neg	neg	3	adult	RH	BE	118.5	159.1	952	122	8.6	11.6	dairy+beef	27	medium	heifer_rearing	Stable_Pen_Pasture	no	public	1	1	1	1	1	>50	closed	1	3	1	1	1	1	0	0	0	1
6	6_3	neg	neg	6	adult	RH	BE	118.5	159.1	952	122	8.6	11.6	dairy+beef	27	medium	heifer_rearing	Stable_Pen_Pasture	no	public	1	1	1	1	1	>50	closed	1	3	1	1	1	1	0	0	0	1
6	6_4	neg	neg	4	adult	SF	BE	118.5	159.1	952	122	8.6	11.6	dairy+beef	27	medium	heifer_rearing	Stable_Pen_Pasture	no	public	1	1	1	1	1	>50	closed	1	3	1	1	1	1	0	0	0	1
6	6_5	neg	neg	3	adult	RH	BE	118.5	159.1	952	122	8.6	11.6	dairy+beef	27	medium	heifer_rearing	Stable_Pen_Pasture	no	public	1	1	1	1	1	>50	closed	1	3	1	1	1	1	0	0	0	1
7	7_1	neg	neg	6	adult	SI	BE	123.8	137.9	602	73	7	7.8	dairy	22	small	heifer_rearing	Stable_Pen_Pasture	yes	ground_pond	1	1	0	0	0	25to50	closed	1	1	0	0	1	1	0	0	1	1
7	7_2	neg	neg	8	adult	SI	BE	123.8	137.9	602	73	7	7.8	dairy	22	small	heifer_rearing	Stable_Pen_Pasture	yes	ground_pond	1	1	0	0	0	25to50	closed	1	1	0	0	1	1	0	0	1	1
7	7_3	neg	neg	4	adult	SI	BE	123.8	137.9	602	73	7	7.8	dairy	22	small	heifer_rearing	Stable_Pen_Pasture	yes	ground_pond	1	1	0	0	0	25to50	closed	1	1	0	0	1	1	0	0	1	1
7	7_4	neg	neg	4	adult	SI	BE	123.8	137.9	602	73	7	7.8	dairy	22	small	heifer_rearing	Stable_Pen_Pasture	yes	ground_pond	1	1	0	0	0	25to50	closed	1	1	0	0	1	1	0	0	1	1
7	7_5	neg	neg	3	adult	SI	BE	123.8	137.9	602	73	7	7.8	dairy	22	small	heifer_rearing	Stable_Pen_Pasture	yes	ground_pond	1	1	0	0	0	25to50	closed	1	1	0	0	1	1	0	0	1	1
8	8_1	neg	neg	3	adult	GV	BE	56.1	10.8	884	192	39.3	7.5	NA	NA	NA	NA	NA	NA	NA	NA	NA	NA	NA	NA	NA	NA	NA	NA	NA	NA	NA	NA	NA	NA	NA	NA
8	8_2	neg	neg	1	1y	GV	BE	56.1	10.8	884	192	39.3	7.5	NA	NA	NA	NA	NA	NA	NA	NA	NA	NA	NA	NA	NA	NA	NA	NA	NA	NA	NA	NA	NA	NA	NA	NA
8	8_3	neg	neg	5	adult	GV	BE	56.1	10.8	884	192	39.3	7.5	NA	NA	NA	NA	NA	NA	NA	NA	NA	NA	NA	NA	NA	NA	NA	NA	NA	NA	NA	NA	NA	NA	NA	NA
8	8_4	neg	neg	5	adult	GV	BE	56.1	10.8	884	192	39.3	7.5	NA	NA	NA	NA	NA	NA	NA	NA	NA	NA	NA	NA	NA	NA	NA	NA	NA	NA	NA	NA	NA	NA	NA	NA
8	8_5	neg	neg	3	adult	SI	BE	56.1	10.8	884	192	39.3	7.5	NA	NA	NA	NA	NA	NA	NA	NA	NA	NA	NA	NA	NA	NA	NA	NA	NA	NA	NA	NA	NA	NA	NA	NA
9	9_1	neg	pos	2	adult	MB	BE	61.8	31.8	977	115	19.7	10.1	dairy+beef	25	medium	heifer_rearing	Stable_Pen_Pasture	partly	ground	1	1	1	1	0	>50	open	1	6	0	1	1	1	0	0	0	1
9	9_2	pos	pos	9	adult	SF	BE	61.8	31.8	977	115	19.7	10.1	dairy+beef	25	medium	heifer_rearing	Stable_Pen_Pasture	partly	ground	1	1	1	1	0	>50	open	1	6	0	1	1	1	0	0	0	1
9	9_3	neg	pos	6	adult	MB	BE	61.8	31.8	977	115	19.7	10.1	dairy+beef	25	medium	heifer_rearing	Stable_Pen_Pasture	partly	ground	1	1	1	1	0	>50	open	1	6	0	1	1	1	0	0	0	1
10	10_1	neg	neg	2	adult	HO	BE	101.8	49	418	173	12.2	5.9	dairy	24	medium	heifer_rearing	Stable_Pasture	no	public	1	1	1	1	1	25to50	open	1	1	0	1	1	0	0	0	1	1
10	10_2	neg	neg	7	adult	SF	BE	101.8	49	418	173	12.2	5.9	dairy	24	medium	heifer_rearing	Stable_Pasture	no	public	1	1	1	1	1	25to50	open	1	1	0	1	1	0	0	0	1	1
10	10_3	neg	neg	6	adult	SF	BE	101.8	49	418	173	12.2	5.9	dairy	24	medium	heifer_rearing	Stable_Pasture	no	public	1	1	1	1	1	25to50	open	1	1	0	1	1	0	0	0	1	1
10	10_4	neg	neg	12	adult	SF	BE	101.8	49	418	173	12.2	5.9	dairy	24	medium	heifer_rearing	Stable_Pasture	no	public	1	1	1	1	1	25to50	open	1	1	0	1	1	0	0	0	1	1
10	10_5	neg	neg	5	adult	SF	BE	101.8	49	418	173	12.2	5.9	dairy	24	medium	heifer_rearing	Stable_Pasture	no	public	1	1	1	1	1	25to50	open	1	1	0	1	1	0	0	0	1	1
11	11_1	neg	neg	7	adult	SF	BE	61	65.1	909	91	5.8	6.2	dairy	17	small	heifer_rearing	Stable_Pasture	no	public	1	1	0	0	1	25to50	closed	0	0	0	0	0	0	0	0	0	1
11	11_2	neg	neg	3	adult	SF	BE	61	65.1	909	91	5.8	6.2	dairy	17	small	heifer_rearing	Stable_Pasture	no	public	1	1	0	0	1	25to50	closed	0	0	0	0	0	0	0	0	0	1
11	11_3	neg	neg	5	adult	SF	BE	61	65.1	909	91	5.8	6.2	dairy	17	small	heifer_rearing	Stable_Pasture	no	public	1	1	0	0	1	25to50	closed	0	0	0	0	0	0	0	0	0	1
11	11_4	neg	neg	4	adult	SF	BE	61	65.1	909	91	5.8	6.2	dairy	17	small	heifer_rearing	Stable_Pasture	no	public	1	1	0	0	1	25to50	closed	0	0	0	0	0	0	0	0	0	1
11	11_5	neg	neg	3	adult	SF	BE	61	65.1	909	91	5.8	6.2	dairy	17	small	heifer_rearing	Stable_Pasture	no	public	1	1	0	0	1	25to50	closed	0	0	0	0	0	0	0	0	0	1
12	12_1	pos	pos	2	adult	SF	BE	87	15.2	944	447	44	7.7	dairy+beef	12	small	heifer_rearing	Stable_Pasture	partly	ground	1	1	0	1	0	>50	closed	0	0	0	0	0	0	0	0	0	1
12	12_2	neg	pos	5	adult	SF	BE	87	15.2	944	447	44	7.7	dairy+beef	12	small	heifer_rearing	Stable_Pasture	partly	ground	1	1	0	1	0	>50	closed	0	0	0	0	0	0	0	0	0	1
12	12_3	neg	pos	6	adult	SF	BE	87	15.2	944	447	44	7.7	dairy+beef	12	small	heifer_rearing	Stable_Pasture	partly	ground	1	1	0	1	0	>50	closed	0	0	0	0	0	0	0	0	0	1
12	12_4	pos	pos	6	adult	SF	BE	87	15.2	944	447	44	7.7	dairy+beef	12	small	heifer_rearing	Stable_Pasture	partly	ground	1	1	0	1	0	>50	closed	0	0	0	0	0	0	0	0	0	1
12	12_5	neg	pos	3	adult	SF	BE	87	15.2	944	447	44	7.7	dairy+beef	12	small	heifer_rearing	Stable_Pasture	partly	ground	1	1	0	1	0	>50	closed	0	0	0	0	0	0	0	0	0	1
13	13_1	pos	pos	4	adult	RH	BE	96.1	66.1	863	150	19.9	13.7	dairy	25	medium	heifer_rearing+buying	Stable_Pasture	yes	public	1	1	0	0	1	>50	closed	1	4	1	0	0	0	0	0	1	1
13	13_2	neg	pos	2	adult	RH	BE	96.1	66.1	863	150	19.9	13.7	dairy	25	medium	heifer_rearing+buying	Stable_Pasture	yes	public	1	1	0	0	1	>50	closed	1	4	1	0	0	0	0	0	1	1
13	13_3	neg	pos	2	adult	HO	BE	96.1	66.1	863	150	19.9	13.7	dairy	25	medium	heifer_rearing+buying	Stable_Pasture	yes	public	1	1	0	0	1	>50	closed	1	4	1	0	0	0	0	0	1	1
13	13_4	pos	pos	2	adult	HO	BE	96.1	66.1	863	150	19.9	13.7	dairy	25	medium	heifer_rearing+buying	Stable_Pasture	yes	public	1	1	0	0	1	>50	closed	1	4	1	0	0	0	0	0	1	1
13	13_5	neg	pos	3	adult	RH	BE	96.1	66.1	863	150	19.9	13.7	dairy	25	medium	heifer_rearing+buying	Stable_Pasture	yes	public	1	1	0	0	1	>50	closed	1	4	1	0	0	0	0	0	1	1
14	14_1	neg	neg	10	adult	SI	BE	33.2	58.2	843	531	4.4	7.8	NA	NA	NA	NA	NA	NA	NA	NA	NA	NA	NA	NA	NA	NA	NA	NA	NA	NA	NA	NA	NA	NA	NA	NA
14	14_2	neg	neg	7	adult	SI	BE	33.2	58.2	843	531	4.4	7.8	NA	NA	NA	NA	NA	NA	NA	NA	NA	NA	NA	NA	NA	NA	NA	NA	NA	NA	NA	NA	NA	NA	NA	NA
14	14_3	neg	neg	8	adult	SI	BE	33.2	58.2	843	531	4.4	7.8	NA	NA	NA	NA	NA	NA	NA	NA	NA	NA	NA	NA	NA	NA	NA	NA	NA	NA	NA	NA	NA	NA	NA	NA
14	14_4	neg	neg	8	adult	SI	BE	33.2	58.2	843	531	4.4	7.8	NA	NA	NA	NA	NA	NA	NA	NA	NA	NA	NA	NA	NA	NA	NA	NA	NA	NA	NA	NA	NA	NA	NA	NA
14	14_5	neg	neg	6	adult	SI	BE	33.2	58.2	843	531	4.4	7.8	NA	NA	NA	NA	NA	NA	NA	NA	NA	NA	NA	NA	NA	NA	NA	NA	NA	NA	NA	NA	NA	NA	NA	NA
15	15_1	neg	neg	15	adult	RH	BE	20.2	49.3	571	106	3.6	8.8	dairy	26	medium	heifer_rearing	Stable_Pasture	yes	public	1	1	1	0	1	25to50	closed	0	0	0	0	0	0	0	0	0	1
15	15_2	neg	neg	3	adult	SF	BE	20.2	49.3	571	106	3.6	8.8	dairy	26	medium	heifer_rearing	Stable_Pasture	yes	public	1	1	1	0	1	25to50	closed	0	0	0	0	0	0	0	0	0	1
15	15_3	neg	neg	4	adult	SF	BE	20.2	49.3	571	106	3.6	8.8	dairy	26	medium	heifer_rearing	Stable_Pasture	yes	public	1	1	1	0	1	25to50	closed	0	0	0	0	0	0	0	0	0	1
15	15_4	neg	neg	5	adult	SF	BE	20.2	49.3	571	106	3.6	8.8	dairy	26	medium	heifer_rearing	Stable_Pasture	yes	public	1	1	1	0	1	25to50	closed	0	0	0	0	0	0	0	0	0	1
15	15_5	neg	neg	10	adult	SF	BE	20.2	49.3	571	106	3.6	8.8	dairy	26	medium	heifer_rearing	Stable_Pasture	yes	public	1	1	1	0	1	25to50	closed	0	0	0	0	0	0	0	0	0	1
16	16_1	neg	neg	2	adult	MB	BE	49.9	11.7	540	316	23.4	5.5	dairy	27	medium	heifer_rearing	Stable_Pen_Pasture	partly	public	1	1	1	1	1	25to50	open	1	3	0	1	1	1	0	0	0	1
16	16_2	neg	neg	6	adult	MB	BE	49.9	11.7	540	316	23.4	5.5	dairy	27	medium	heifer_rearing	Stable_Pen_Pasture	partly	public	1	1	1	1	1	25to50	open	1	3	0	1	1	1	0	0	0	1
16	16_3	neg	neg	5	adult	MB	BE	49.9	11.7	540	316	23.4	5.5	dairy	27	medium	heifer_rearing	Stable_Pen_Pasture	partly	public	1	1	1	1	1	25to50	open	1	3	0	1	1	1	0	0	0	1
16	16_4	neg	neg	5	adult	MB	BE	49.9	11.7	540	316	23.4	5.5	dairy	27	medium	heifer_rearing	Stable_Pen_Pasture	partly	public	1	1	1	1	1	25to50	open	1	3	0	1	1	1	0	0	0	1
16	16_5	neg	neg	9	adult	MB	BE	49.9	11.7	540	316	23.4	5.5	dairy	27	medium	heifer_rearing	Stable_Pen_Pasture	partly	public	1	1	1	1	1	25to50	open	1	3	0	1	1	1	0	0	0	1
17	17_1	neg	neg	9	adult	SI	BE	106.9	88	925	68	10.2	8.4	dairy+beef	12	small	heifer_rearing	Stable_Pasture	partly	ground	1	1	0	0	1	<25	open	0	0	0	0	1	0	0	0	0	1
17	17_2	neg	neg	9	adult	SI	BE	106.9	88	925	68	10.2	8.4	dairy+beef	12	small	heifer_rearing	Stable_Pasture	partly	ground	1	1	0	0	1	<25	open	0	0	0	0	1	0	0	0	0	1
17	17_3	neg	neg	4	adult	SI	BE	106.9	88	925	68	10.2	8.4	dairy+beef	12	small	heifer_rearing	Stable_Pasture	partly	ground	1	1	0	0	1	<25	open	0	0	0	0	1	0	0	0	0	1
17	17_4	neg	neg	5	adult	SI	BE	106.9	88	925	68	10.2	8.4	dairy+beef	12	small	heifer_rearing	Stable_Pasture	partly	ground	1	1	0	0	1	<25	open	0	0	0	0	1	0	0	0	0	1
18	18_1	neg	neg	3	adult	SI	BE	62	175.6	940	24	5.3	15	dairy+beef	11	small	heifer_rearing	Stable_Pen_Pasture	partly	ground	1	1	1	0	1	>50	open	0	0	0	0	0	0	0	0	0	1
18	18_2	neg	neg	7	adult	SI	BE	62	175.6	940	24	5.3	15	dairy+beef	11	small	heifer_rearing	Stable_Pen_Pasture	partly	ground	1	1	1	0	1	>50	open	0	0	0	0	0	0	0	0	0	1
18	18_3	neg	neg	6	adult	SI	BE	62	175.6	940	24	5.3	15	dairy+beef	11	small	heifer_rearing	Stable_Pen_Pasture	partly	ground	1	1	1	0	1	>50	open	0	0	0	0	0	0	0	0	0	1
18	18_4	neg	neg	6	adult	SI	BE	62	175.6	940	24	5.3	15	dairy+beef	11	small	heifer_rearing	Stable_Pen_Pasture	partly	ground	1	1	1	0	1	>50	open	0	0	0	0	0	0	0	0	0	1
18	18_5	neg	neg	11	adult	SI	BE	62	175.6	940	24	5.3	15	dairy+beef	11	small	heifer_rearing	Stable_Pen_Pasture	partly	ground	1	1	1	0	1	>50	open	0	0	0	0	0	0	0	0	0	1
19	19_1	neg	neg	4	adult	MIX	BE	60.3	7.3	355	1594	31.2	3.8	dairy	20	small	heifer_rearing	Stable_Pasture	no	ground	1	1	1	1	1	>50	closed	1	NA	0	0	0	0	0	0	0	1
19	19_2	neg	neg	6	adult	SF	BE	60.3	7.3	355	1594	31.2	3.8	dairy	20	small	heifer_rearing	Stable_Pasture	no	ground	1	1	1	1	1	>50	closed	1	NA	0	0	0	0	0	0	0	1
19	19_3	neg	neg	5	adult	RH	BE	60.3	7.3	355	1594	31.2	3.8	dairy	20	small	heifer_rearing	Stable_Pasture	no	ground	1	1	1	1	1	>50	closed	1	NA	0	0	0	0	0	0	0	1
19	19_4	neg	neg	5	adult	SF	BE	60.3	7.3	355	1594	31.2	3.8	dairy	20	small	heifer_rearing	Stable_Pasture	no	ground	1	1	1	1	1	>50	closed	1	NA	0	0	0	0	0	0	0	1
19	19_5	neg	neg	4	adult	RH	BE	60.3	7.3	355	1594	31.2	3.8	dairy	20	small	heifer_rearing	Stable_Pasture	no	ground	1	1	1	1	1	>50	closed	1	NA	0	0	0	0	0	0	0	1
20	20_1	neg	neg	5	adult	RH	BE	56.6	11.4	861	676	29.1	5.8	NA	NA	NA	NA	NA	NA	NA	NA	NA	NA	NA	NA	NA	NA	NA	NA	NA	NA	NA	NA	NA	NA	NA	NA
20	20_2	neg	neg	5	adult	HO	BE	56.6	11.4	861	676	29.1	5.8	NA	NA	NA	NA	NA	NA	NA	NA	NA	NA	NA	NA	NA	NA	NA	NA	NA	NA	NA	NA	NA	NA	NA	NA
20	20_3	neg	neg	3	adult	HO	BE	56.6	11.4	861	676	29.1	5.8	NA	NA	NA	NA	NA	NA	NA	NA	NA	NA	NA	NA	NA	NA	NA	NA	NA	NA	NA	NA	NA	NA	NA	NA
20	20_4	neg	neg	10	adult	SF	BE	56.6	11.4	861	676	29.1	5.8	NA	NA	NA	NA	NA	NA	NA	NA	NA	NA	NA	NA	NA	NA	NA	NA	NA	NA	NA	NA	NA	NA	NA	NA
20	20_5	neg	neg	5	adult	HO	BE	56.6	11.4	861	676	29.1	5.8	NA	NA	NA	NA	NA	NA	NA	NA	NA	NA	NA	NA	NA	NA	NA	NA	NA	NA	NA	NA	NA	NA	NA	NA
21	21_1	pos	pos	6	adult	RH	SO	14.4	2.8	2407	340	28.1	5.4	dairy	25	medium	heifer_rearing+buying	Stable_Pen_Pasture	partly	ground	1	1	1	1	1	>50	open	1	4	0	1	1	0	0	0	1	1
21	21_2	neg	pos	7	adult	RH	SO	14.4	2.8	2407	340	28.1	5.4	dairy	25	medium	heifer_rearing+buying	Stable_Pen_Pasture	partly	ground	1	1	1	1	1	>50	open	1	4	0	1	1	0	0	0	1	1
21	21_3	neg	pos	4	adult	SF	SO	14.4	2.8	2407	340	28.1	5.4	dairy	25	medium	heifer_rearing+buying	Stable_Pen_Pasture	partly	ground	1	1	1	1	1	>50	open	1	4	0	1	1	0	0	0	1	1
21	21_4	neg	pos	9	adult	RH	SO	14.4	2.8	2407	340	28.1	5.4	dairy	25	medium	heifer_rearing+buying	Stable_Pen_Pasture	partly	ground	1	1	1	1	1	>50	open	1	4	0	1	1	0	0	0	1	1
21	21_5	neg	pos	6	adult	RH	SO	14.4	2.8	2407	340	28.1	5.4	dairy	25	medium	heifer_rearing+buying	Stable_Pen_Pasture	partly	ground	1	1	1	1	1	>50	open	1	4	0	1	1	0	0	0	1	1
22	22_1	neg	pos	16	adult	OB	BL	73.9	152.1	2885	80	7.2	14.7	NA	NA	NA	NA	NA	NA	NA	NA	NA	NA	NA	NA	NA	NA	NA	NA	NA	NA	NA	NA	NA	NA	NA	NA
22	22_2	pos	pos	8	adult	OB	BL	73.9	152.1	2885	80	7.2	14.7	NA	NA	NA	NA	NA	NA	NA	NA	NA	NA	NA	NA	NA	NA	NA	NA	NA	NA	NA	NA	NA	NA	NA	NA
22	22_3	neg	pos	4	adult	OB	BL	73.9	152.1	2885	80	7.2	14.7	NA	NA	NA	NA	NA	NA	NA	NA	NA	NA	NA	NA	NA	NA	NA	NA	NA	NA	NA	NA	NA	NA	NA	NA
22	22_4	neg	pos	11	adult	OB	BL	73.9	152.1	2885	80	7.2	14.7	NA	NA	NA	NA	NA	NA	NA	NA	NA	NA	NA	NA	NA	NA	NA	NA	NA	NA	NA	NA	NA	NA	NA	NA
22	22_5	neg	pos	5	adult	OB	BL	73.9	152.1	2885	80	7.2	14.7	NA	NA	NA	NA	NA	NA	NA	NA	NA	NA	NA	NA	NA	NA	NA	NA	NA	NA	NA	NA	NA	NA	NA	NA
23	23_1	neg	neg	3	adult	RH	BL	27.3	10.3	2785	145	24.7	9.3	dairy	22	small	buying	Stable_Pasture	no	public	1	1	1	1	1	>50	closed	0	0	0	0	0	0	0	0	0	1
23	23_2	neg	neg	4	adult	SF	BL	27.3	10.3	2785	145	24.7	9.3	dairy	22	small	buying	Stable_Pasture	no	public	1	1	1	1	1	>50	closed	0	0	0	0	0	0	0	0	0	1
23	23_3	neg	neg	11	adult	RH	BL	27.3	10.3	2785	145	24.7	9.3	dairy	22	small	buying	Stable_Pasture	no	public	1	1	1	1	1	>50	closed	0	0	0	0	0	0	0	0	0	1
23	23_4	neg	neg	5	adult	RH	BL	27.3	10.3	2785	145	24.7	9.3	dairy	22	small	buying	Stable_Pasture	no	public	1	1	1	1	1	>50	closed	0	0	0	0	0	0	0	0	0	1
23	23_5	neg	neg	4	adult	RH	BL	27.3	10.3	2785	145	24.7	9.3	dairy	22	small	buying	Stable_Pasture	no	public	1	1	1	1	1	>50	closed	0	0	0	0	0	0	0	0	0	1
24	24_1	neg	neg	2	adult	RH	SO	60.1	39.8	2474	125	20.9	13.8	beef	50	large	buying	Stable_Pen_Pasture	yes	public	1	1	1	0	0	25to50	open	0	0	0	1	1	0	0	0	1	1
24	24_2	neg	neg	4	adult	RH	SO	60.1	39.8	2474	125	20.9	13.8	beef	50	large	buying	Stable_Pen_Pasture	yes	public	1	1	1	0	0	25to50	open	0	0	0	1	1	0	0	0	1	1
24	24_3	neg	neg	6	adult	HO	SO	60.1	39.8	2474	125	20.9	13.8	beef	50	large	buying	Stable_Pen_Pasture	yes	public	1	1	1	0	0	25to50	open	0	0	0	1	1	0	0	0	1	1
24	24_4	neg	neg	3	adult	HO	SO	60.1	39.8	2474	125	20.9	13.8	beef	50	large	buying	Stable_Pen_Pasture	yes	public	1	1	1	0	0	25to50	open	0	0	0	1	1	0	0	0	1	1
24	24_5	neg	neg	5	adult	HO	SO	60.1	39.8	2474	125	20.9	13.8	beef	50	large	buying	Stable_Pen_Pasture	yes	public	1	1	1	0	0	25to50	open	0	0	0	1	1	0	0	0	1	1
25	25_1	neg	neg	4	adult	HO	BL	10.8	2.1	2787	280	24.6	4.8	dairy	25	medium	heifer_rearing	Stable_Pen	NA	ground	0	1	1	1	1	<25	open	don't_know	NA	0	1	0	0	0	0	0	1
25	25_2	neg	neg	5	adult	HO	BL	10.8	2.1	2787	280	24.6	4.8	dairy	25	medium	heifer_rearing	Stable_Pen	NA	ground	0	1	1	1	1	<25	open	don't_know	NA	0	1	0	0	0	0	0	1
25	25_3	neg	neg	10	adult	HO	BL	10.8	2.1	2787	280	24.6	4.8	dairy	25	medium	heifer_rearing	Stable_Pen	NA	ground	0	1	1	1	1	<25	open	don't_know	NA	0	1	0	0	0	0	0	1
25	25_4	neg	neg	4	adult	HO	BL	10.8	2.1	2787	280	24.6	4.8	dairy	25	medium	heifer_rearing	Stable_Pen	NA	ground	0	1	1	1	1	<25	open	don't_know	NA	0	1	0	0	0	0	0	1
25	25_5	neg	neg	3	adult	HO	BL	10.8	2.1	2787	280	24.6	4.8	dairy	25	medium	heifer_rearing	Stable_Pen	NA	ground	0	1	1	1	1	<25	open	don't_know	NA	0	1	0	0	0	0	0	1
26	26_1	neg	neg	2	adult	RH	BE	86.2	73.6	907	206	9.3	7.9	dairy+beef	24	medium	heifer_rearing	Stable_Pen_Pasture	no	public	1	1	0	0	1	>50	open	don't_know	NA	0	1	1	0	0	1	0	1
26	26_2	neg	neg	2	adult	RH	BE	86.2	73.6	907	206	9.3	7.9	dairy+beef	24	medium	heifer_rearing	Stable_Pen_Pasture	no	public	1	1	0	0	1	>50	open	don't_know	NA	0	1	1	0	0	1	0	1
26	26_3	neg	neg	2	adult	HO	BE	86.2	73.6	907	206	9.3	7.9	dairy+beef	24	medium	heifer_rearing	Stable_Pen_Pasture	no	public	1	1	0	0	1	>50	open	don't_know	NA	0	1	1	0	0	1	0	1
26	26_4	neg	neg	2	adult	RH	BE	86.2	73.6	907	206	9.3	7.9	dairy+beef	24	medium	heifer_rearing	Stable_Pen_Pasture	no	public	1	1	0	0	1	>50	open	don't_know	NA	0	1	1	0	0	1	0	1
26	26_5	neg	neg	3	adult	RH	BE	86.2	73.6	907	206	9.3	7.9	dairy+beef	24	medium	heifer_rearing	Stable_Pen_Pasture	no	public	1	1	0	0	1	>50	open	don't_know	NA	0	1	1	0	0	1	0	1
27	27_1	neg	neg	12	adult	SI	GR	32.3	44	3661	247	7.9	10.8	rearing	47	large	heifer_rearing	Stable_Pen_Pasture	yes	public	1	1	1	1	1	25to50	closed	1	NA	0	1	1	1	0	0	0	1
27	27_2	neg	neg	4	adult	BV	GR	32.3	44	3661	247	7.9	10.8	rearing	47	large	heifer_rearing	Stable_Pen_Pasture	yes	public	1	1	1	1	1	25to50	closed	1	NA	0	1	1	1	0	0	0	1
27	27_3	neg	neg	4	adult	BV	GR	32.3	44	3661	247	7.9	10.8	rearing	47	large	heifer_rearing	Stable_Pen_Pasture	yes	public	1	1	1	1	1	25to50	closed	1	NA	0	1	1	1	0	0	0	1
27	27_4	neg	neg	7	adult	BV	GR	32.3	44	3661	247	7.9	10.8	rearing	47	large	heifer_rearing	Stable_Pen_Pasture	yes	public	1	1	1	1	1	25to50	closed	1	NA	0	1	1	1	0	0	0	1
27	27_5	neg	neg	2	adult	BV	GR	32.3	44	3661	247	7.9	10.8	rearing	47	large	heifer_rearing	Stable_Pen_Pasture	yes	public	1	1	1	1	1	25to50	closed	1	NA	0	1	1	1	0	0	0	1
28	28_1	neg	pos	5	adult	BV	GR	15.9	67.9	3861	43	1.7	7.2	dairy+beef+rearing	8	small	heifer_rearing+buying	Stable_Pen_Pasture	yes	public	1	1	1	0	0	25to50	closed	1	1.5	0	1	0	0	0	0	1	0
28	28_2	neg	pos	4	adult	BV	GR	15.9	67.9	3861	43	1.7	7.2	dairy+beef+rearing	8	small	heifer_rearing+buying	Stable_Pen_Pasture	yes	public	1	1	1	0	0	25to50	closed	1	1.5	0	1	0	0	0	0	1	0
28	28_3	neg	pos	4	adult	BV	GR	15.9	67.9	3861	43	1.7	7.2	dairy+beef+rearing	8	small	heifer_rearing+buying	Stable_Pen_Pasture	yes	public	1	1	1	0	0	25to50	closed	1	1.5	0	1	0	0	0	0	1	0
28	28_4	neg	pos	4	adult	BV	GR	15.9	67.9	3861	43	1.7	7.2	dairy+beef+rearing	8	small	heifer_rearing+buying	Stable_Pen_Pasture	yes	public	1	1	1	0	0	25to50	closed	1	1.5	0	1	0	0	0	0	1	0
28	28_5	pos	pos	11	adult	BV	GR	15.9	67.9	3861	43	1.7	7.2	dairy+beef+rearing	8	small	heifer_rearing+buying	Stable_Pen_Pasture	yes	public	1	1	1	0	0	25to50	closed	1	1.5	0	1	0	0	0	0	1	0
29	29_1	neg	neg	4	adult	GV	GR	28.1	517.9	3669	15	0.6	11.2	NA	NA	NA	NA	NA	NA	NA	NA	NA	NA	NA	NA	NA	NA	NA	NA	NA	NA	NA	NA	NA	NA	NA	NA
29	29_2	neg	neg	10	adult	GV	GR	28.1	517.9	3669	15	0.6	11.2	NA	NA	NA	NA	NA	NA	NA	NA	NA	NA	NA	NA	NA	NA	NA	NA	NA	NA	NA	NA	NA	NA	NA	NA
29	29_3	neg	neg	14	adult	GV	GR	28.1	517.9	3669	15	0.6	11.2	NA	NA	NA	NA	NA	NA	NA	NA	NA	NA	NA	NA	NA	NA	NA	NA	NA	NA	NA	NA	NA	NA	NA	NA
29	29_4	neg	neg	1	1y	GV	GR	28.1	517.9	3669	15	0.6	11.2	NA	NA	NA	NA	NA	NA	NA	NA	NA	NA	NA	NA	NA	NA	NA	NA	NA	NA	NA	NA	NA	NA	NA	NA
29	29_5	neg	neg	0	< 1y	GV	GR	28.1	517.9	3669	15	0.6	11.2	NA	NA	NA	NA	NA	NA	NA	NA	NA	NA	NA	NA	NA	NA	NA	NA	NA	NA	NA	NA	NA	NA	NA	NA
30	30_1	neg	neg	5	adult	BV	GR	11	55.7	3701	85	1.8	9.3	NA	NA	NA	NA	NA	NA	NA	NA	NA	NA	NA	NA	NA	NA	NA	NA	NA	NA	NA	NA	NA	NA	NA	NA
30	30_2	neg	neg	3	adult	OB	GR	11	55.7	3701	85	1.8	9.3	NA	NA	NA	NA	NA	NA	NA	NA	NA	NA	NA	NA	NA	NA	NA	NA	NA	NA	NA	NA	NA	NA	NA	NA
30	30_3	neg	neg	3	adult	OB	GR	11	55.7	3701	85	1.8	9.3	NA	NA	NA	NA	NA	NA	NA	NA	NA	NA	NA	NA	NA	NA	NA	NA	NA	NA	NA	NA	NA	NA	NA	NA
30	30_4	neg	neg	3	adult	OB	GR	11	55.7	3701	85	1.8	9.3	NA	NA	NA	NA	NA	NA	NA	NA	NA	NA	NA	NA	NA	NA	NA	NA	NA	NA	NA	NA	NA	NA	NA	NA
30	30_5	neg	neg	4	adult	OB	GR	11	55.7	3701	85	1.8	9.3	NA	NA	NA	NA	NA	NA	NA	NA	NA	NA	NA	NA	NA	NA	NA	NA	NA	NA	NA	NA	NA	NA	NA	NA
31	31_1	neg	neg	5	adult	BV	GR	12.8	174.9	3543	244	0.8	10.3	rearing	76	large	NA	Stable_Pen_Pasture	yes	ground	1	1	1	0	0	25to50	open	1	2	0	0	0	0	0	0	0	1
31	31_2	neg	neg	2	adult	HO	GR	12.8	174.9	3543	244	0.8	10.3	rearing	76	large	NA	Stable_Pen_Pasture	yes	ground	1	1	1	0	0	25to50	open	1	2	0	0	0	0	0	0	0	1
31	31_3	neg	neg	2	adult	BV	GR	12.8	174.9	3543	244	0.8	10.3	rearing	76	large	NA	Stable_Pen_Pasture	yes	ground	1	1	1	0	0	25to50	open	1	2	0	0	0	0	0	0	0	1
31	31_4	neg	neg	1	1y	HO	GR	12.8	174.9	3543	244	0.8	10.3	rearing	76	large	NA	Stable_Pen_Pasture	yes	ground	1	1	1	0	0	25to50	open	1	2	0	0	0	0	0	0	0	1
31	31_5	neg	neg	2	adult	HO	GR	12.8	174.9	3543	244	0.8	10.3	rearing	76	large	NA	Stable_Pen_Pasture	yes	ground	1	1	1	0	0	25to50	open	1	2	0	0	0	0	0	0	0	1
32	32_1	neg	neg	10	adult	BV	GR	28.3	70.9	3911	216	4.5	11.2	dairy+beef	30	medium	heifer_rearing	Stable_Pen	yes	ground	1	1	1	0	1	0	closed	1	10	1	1	1	0	0	0	0	0
32	32_2	neg	neg	NA	adult	BV	GR	28.3	70.9	3911	216	4.5	11.2	dairy+beef	30	medium	heifer_rearing	Stable_Pen	yes	ground	1	1	1	0	1	0	closed	1	10	1	1	1	0	0	0	0	0
32	32_3	neg	neg	NA	adult	BV	GR	28.3	70.9	3911	216	4.5	11.2	dairy+beef	30	medium	heifer_rearing	Stable_Pen	yes	ground	1	1	1	0	1	0	closed	1	10	1	1	1	0	0	0	0	0
32	32_4	neg	neg	NA	adult	BV	GR	28.3	70.9	3911	216	4.5	11.2	dairy+beef	30	medium	heifer_rearing	Stable_Pen	yes	ground	1	1	1	0	1	0	closed	1	10	1	1	1	0	0	0	0	0
32	32_5	neg	neg	NA	adult	BV	GR	28.3	70.9	3911	216	4.5	11.2	dairy+beef	30	medium	heifer_rearing	Stable_Pen	yes	ground	1	1	1	0	1	0	closed	1	10	1	1	1	0	0	0	0	0
33	33_1	neg	neg	5	adult	BV	GR	8	90.4	3986	68	0.5	5.7	NA	NA	NA	NA	NA	NA	NA	NA	NA	NA	NA	NA	NA	NA	NA	NA	NA	NA	NA	NA	NA	NA	NA	NA
33	33_2	neg	neg	2	adult	BV	GR	8	90.4	3986	68	0.5	5.7	NA	NA	NA	NA	NA	NA	NA	NA	NA	NA	NA	NA	NA	NA	NA	NA	NA	NA	NA	NA	NA	NA	NA	NA
33	33_3	neg	neg	3	adult	BV	GR	8	90.4	3986	68	0.5	5.7	NA	NA	NA	NA	NA	NA	NA	NA	NA	NA	NA	NA	NA	NA	NA	NA	NA	NA	NA	NA	NA	NA	NA	NA
33	33_4	neg	neg	6	adult	BV	GR	8	90.4	3986	68	0.5	5.7	NA	NA	NA	NA	NA	NA	NA	NA	NA	NA	NA	NA	NA	NA	NA	NA	NA	NA	NA	NA	NA	NA	NA	NA
33	33_5	neg	neg	6	adult	BV	GR	8	90.4	3986	68	0.5	5.7	NA	NA	NA	NA	NA	NA	NA	NA	NA	NA	NA	NA	NA	NA	NA	NA	NA	NA	NA	NA	NA	NA	NA	NA
34	34_1	neg	pos	5	adult	MIX	GR	8.1	76.8	3762	406	0.9	8.8	NA	NA	NA	NA	NA	NA	NA	NA	NA	NA	NA	NA	NA	NA	NA	NA	NA	NA	NA	NA	NA	NA	NA	NA
34	34_2	neg	pos	3	adult	MIX	GR	8.1	76.8	3762	406	0.9	8.8	NA	NA	NA	NA	NA	NA	NA	NA	NA	NA	NA	NA	NA	NA	NA	NA	NA	NA	NA	NA	NA	NA	NA	NA
34	34_3	neg	pos	6	adult	BV	GR	8.1	76.8	3762	406	0.9	8.8	NA	NA	NA	NA	NA	NA	NA	NA	NA	NA	NA	NA	NA	NA	NA	NA	NA	NA	NA	NA	NA	NA	NA	NA
34	34_4	pos	pos	10	adult	BV	GR	8.1	76.8	3762	406	0.9	8.8	NA	NA	NA	NA	NA	NA	NA	NA	NA	NA	NA	NA	NA	NA	NA	NA	NA	NA	NA	NA	NA	NA	NA	NA
34	34_5	neg	pos	7	adult	BV	GR	8.1	76.8	3762	406	0.9	8.8	NA	NA	NA	NA	NA	NA	NA	NA	NA	NA	NA	NA	NA	NA	NA	NA	NA	NA	NA	NA	NA	NA	NA	NA
35	35_1	neg	neg	7	adult	SF	LU	119.3	136.8	1129	62	7.7	8.8	NA	NA	NA	NA	NA	NA	NA	NA	NA	NA	NA	NA	NA	NA	NA	NA	NA	NA	NA	NA	NA	NA	NA	NA
35	35_2	neg	neg	5	adult	MIX	LU	119.3	136.8	1129	62	7.7	8.8	NA	NA	NA	NA	NA	NA	NA	NA	NA	NA	NA	NA	NA	NA	NA	NA	NA	NA	NA	NA	NA	NA	NA	NA
35	35_3	neg	neg	8	adult	SF	LU	119.3	136.8	1129	62	7.7	8.8	NA	NA	NA	NA	NA	NA	NA	NA	NA	NA	NA	NA	NA	NA	NA	NA	NA	NA	NA	NA	NA	NA	NA	NA
35	35_4	neg	neg	6	adult	RH	LU	119.3	136.8	1129	62	7.7	8.8	NA	NA	NA	NA	NA	NA	NA	NA	NA	NA	NA	NA	NA	NA	NA	NA	NA	NA	NA	NA	NA	NA	NA	NA
35	35_5	neg	neg	5	adult	SF	LU	119.3	136.8	1129	62	7.7	8.8	NA	NA	NA	NA	NA	NA	NA	NA	NA	NA	NA	NA	NA	NA	NA	NA	NA	NA	NA	NA	NA	NA	NA	NA
36	36_1	neg	neg	8	adult	SF	LU	53.2	313.5	1004	147	1.4	8	dairy	30	medium	heifer_rearing+buying	Stable_Pen_Pasture	no	ground	1	1	1	0	1	>50	closed	1	2	0	0	1	0	0	0	0	0
36	36_2	neg	neg	5	adult	SF	LU	53.2	313.5	1004	147	1.4	8	dairy	30	medium	heifer_rearing+buying	Stable_Pen_Pasture	no	ground	1	1	1	0	1	>50	closed	1	2	0	0	1	0	0	0	0	0
36	36_3	neg	neg	4	adult	RH	LU	53.2	313.5	1004	147	1.4	8	dairy	30	medium	heifer_rearing+buying	Stable_Pen_Pasture	no	ground	1	1	1	0	1	>50	closed	1	2	0	0	1	0	0	0	0	0
36	36_4	neg	neg	5	adult	RH	LU	53.2	313.5	1004	147	1.4	8	dairy	30	medium	heifer_rearing+buying	Stable_Pen_Pasture	no	ground	1	1	1	0	1	>50	closed	1	2	0	0	1	0	0	0	0	0
36	36_5	neg	neg	3	adult	JY	LU	53.2	313.5	1004	147	1.4	8	dairy	30	medium	heifer_rearing+buying	Stable_Pen_Pasture	no	ground	1	1	1	0	1	>50	closed	1	2	0	0	1	0	0	0	0	0
37	37_1	pos	pos	4	adult	GV	LU	88.7	80.3	1008	344	9	8.1	beef	35	large	buying	Stable_Pasture	partly	public	1	1	1	0	0	25to50	open	1	2	1	0	1	0	0	0	0	1
37	37_2	neg	pos	2	adult	MIX	LU	88.7	80.3	1008	344	9	8.1	beef	35	large	buying	Stable_Pasture	partly	public	1	1	1	0	0	25to50	open	1	2	1	0	1	0	0	0	0	1
37	37_3	neg	pos	5	adult	GV	LU	88.7	80.3	1008	344	9	8.1	beef	35	large	buying	Stable_Pasture	partly	public	1	1	1	0	0	25to50	open	1	2	1	0	1	0	0	0	0	1
37	37_4	neg	pos	12	adult	GV	LU	88.7	80.3	1008	344	9	8.1	beef	35	large	buying	Stable_Pasture	partly	public	1	1	1	0	0	25to50	open	1	2	1	0	1	0	0	0	0	1
37	37_5	neg	pos	5	adult	GV	LU	88.7	80.3	1008	344	9	8.1	beef	35	large	buying	Stable_Pasture	partly	public	1	1	1	0	0	25to50	open	1	2	1	0	1	0	0	0	0	1
38	38_1	neg	neg	3	adult	BV	LU	94.9	50.3	1151	602	12.7	6.8	dairy	50	large	buying	Stable_Pen_Pasture	no	public	1	1	1	1	1	25to50	closed	1	3.5	1	0	0	0	0	0	0	0
38	38_2	neg	neg	3	adult	BV	LU	94.9	50.3	1151	602	12.7	6.8	dairy	50	large	buying	Stable_Pen_Pasture	no	public	1	1	1	1	1	25to50	closed	1	3.5	1	0	0	0	0	0	0	0
38	38_3	neg	neg	3	adult	BV	LU	94.9	50.3	1151	602	12.7	6.8	dairy	50	large	buying	Stable_Pen_Pasture	no	public	1	1	1	1	1	25to50	closed	1	3.5	1	0	0	0	0	0	0	0
38	38_4	neg	neg	5	adult	BV	LU	94.9	50.3	1151	602	12.7	6.8	dairy	50	large	buying	Stable_Pen_Pasture	no	public	1	1	1	1	1	25to50	closed	1	3.5	1	0	0	0	0	0	0	0
38	38_5	neg	neg	7	adult	BV	LU	94.9	50.3	1151	602	12.7	6.8	dairy	50	large	buying	Stable_Pen_Pasture	no	public	1	1	1	1	1	25to50	closed	1	3.5	1	0	0	0	0	0	0	0
39	39_1	neg	neg	3	adult	BV	LU	96	157.8	1132	249	7.9	13.1	NA	NA	NA	NA	NA	NA	NA	NA	NA	NA	NA	NA	NA	NA	NA	NA	NA	NA	NA	NA	NA	NA	NA	NA
39	39_2	neg	neg	6	adult	BV	LU	96	157.8	1132	249	7.9	13.1	NA	NA	NA	NA	NA	NA	NA	NA	NA	NA	NA	NA	NA	NA	NA	NA	NA	NA	NA	NA	NA	NA	NA	NA
39	39_3	neg	neg	3	adult	BV	LU	96	157.8	1132	249	7.9	13.1	NA	NA	NA	NA	NA	NA	NA	NA	NA	NA	NA	NA	NA	NA	NA	NA	NA	NA	NA	NA	NA	NA	NA	NA
39	39_4	neg	neg	4	adult	BV	LU	96	157.8	1132	249	7.9	13.1	NA	NA	NA	NA	NA	NA	NA	NA	NA	NA	NA	NA	NA	NA	NA	NA	NA	NA	NA	NA	NA	NA	NA	NA
39	39_5	neg	neg	4	adult	BV	LU	96	157.8	1132	249	7.9	13.1	NA	NA	NA	NA	NA	NA	NA	NA	NA	NA	NA	NA	NA	NA	NA	NA	NA	NA	NA	NA	NA	NA	NA	NA
40	40_1	neg	neg	3	adult	HO	LU	94.9	50.3	1151	602	12.7	6.8	NA	NA	NA	NA	NA	NA	NA	NA	NA	NA	NA	NA	NA	NA	NA	NA	NA	NA	NA	NA	NA	NA	NA	NA
40	40_2	neg	neg	3	adult	HO	LU	94.9	50.3	1151	602	12.7	6.8	NA	NA	NA	NA	NA	NA	NA	NA	NA	NA	NA	NA	NA	NA	NA	NA	NA	NA	NA	NA	NA	NA	NA	NA
40	40_3	neg	neg	7	adult	HO	LU	94.9	50.3	1151	602	12.7	6.8	NA	NA	NA	NA	NA	NA	NA	NA	NA	NA	NA	NA	NA	NA	NA	NA	NA	NA	NA	NA	NA	NA	NA	NA
40	40_4	neg	neg	8	adult	SF	LU	94.9	50.3	1151	602	12.7	6.8	NA	NA	NA	NA	NA	NA	NA	NA	NA	NA	NA	NA	NA	NA	NA	NA	NA	NA	NA	NA	NA	NA	NA	NA
40	40_5	neg	neg	5	adult	RH	LU	94.9	50.3	1151	602	12.7	6.8	NA	NA	NA	NA	NA	NA	NA	NA	NA	NA	NA	NA	NA	NA	NA	NA	NA	NA	NA	NA	NA	NA	NA	NA
41	41_1	neg	pos	7	adult	GV	LU	60.6	148.3	1010	449	4.2	10.3	beef	25	medium	buying	Stable_Pen_Pasture	no	public	1	1	1	0	0	>50	closed	1	2	0	1	1	1	0	0	0	1
41	41_2	neg	pos	9	adult	GV	LU	60.6	148.3	1010	449	4.2	10.3	beef	25	medium	buying	Stable_Pen_Pasture	no	public	1	1	1	0	0	>50	closed	1	2	0	1	1	1	0	0	0	1
41	41_3	neg	pos	11	adult	GV	LU	60.6	148.3	1010	449	4.2	10.3	beef	25	medium	buying	Stable_Pen_Pasture	no	public	1	1	1	0	0	>50	closed	1	2	0	1	1	1	0	0	0	1
41	41_4	pos	pos	6	adult	GV	LU	60.6	148.3	1010	449	4.2	10.3	beef	25	medium	buying	Stable_Pen_Pasture	no	public	1	1	1	0	0	>50	closed	1	2	0	1	1	1	0	0	0	1
41	41_5	neg	pos	3	adult	GV	LU	60.6	148.3	1010	449	4.2	10.3	beef	25	medium	buying	Stable_Pen_Pasture	no	public	1	1	1	0	0	>50	closed	1	2	0	1	1	1	0	0	0	1
42	42_1	neg	neg	9	adult	BV	LU	95.4	36.8	1062	419	14.7	5.7	dairy+beef	27	medium	heifer_rearing	Stable_Pen_Pasture	partly	public_ground	1	1	1	1	1	25to50	closed	0	0	0	0	0	0	0	0	0	1
42	42_2	neg	neg	4	adult	BV	LU	95.4	36.8	1062	419	14.7	5.7	dairy+beef	27	medium	heifer_rearing	Stable_Pen_Pasture	partly	public_ground	1	1	1	1	1	25to50	closed	0	0	0	0	0	0	0	0	0	1
42	42_3	neg	neg	7	adult	BV	LU	95.4	36.8	1062	419	14.7	5.7	dairy+beef	27	medium	heifer_rearing	Stable_Pen_Pasture	partly	public_ground	1	1	1	1	1	25to50	closed	0	0	0	0	0	0	0	0	0	1
42	42_4	neg	neg	8	adult	BV	LU	95.4	36.8	1062	419	14.7	5.7	dairy+beef	27	medium	heifer_rearing	Stable_Pen_Pasture	partly	public_ground	1	1	1	1	1	25to50	closed	0	0	0	0	0	0	0	0	0	1
42	42_5	neg	neg	6	adult	BV	LU	95.4	36.8	1062	419	14.7	5.7	dairy+beef	27	medium	heifer_rearing	Stable_Pen_Pasture	partly	public_ground	1	1	1	1	1	25to50	closed	0	0	0	0	0	0	0	0	0	1
43	43_1	neg	neg	8	adult	SF	LU	60.6	148.3	1010	449	4.2	10.3	NA	NA	NA	NA	NA	NA	NA	NA	NA	NA	NA	NA	NA	NA	NA	NA	NA	NA	NA	NA	NA	NA	NA	NA
43	43_2	neg	neg	3	adult	RH	LU	60.6	148.3	1010	449	4.2	10.3	NA	NA	NA	NA	NA	NA	NA	NA	NA	NA	NA	NA	NA	NA	NA	NA	NA	NA	NA	NA	NA	NA	NA	NA
43	43_3	neg	neg	8	adult	HO	LU	60.6	148.3	1010	449	4.2	10.3	NA	NA	NA	NA	NA	NA	NA	NA	NA	NA	NA	NA	NA	NA	NA	NA	NA	NA	NA	NA	NA	NA	NA	NA
43	43_4	neg	neg	8	adult	SF	LU	60.6	148.3	1010	449	4.2	10.3	NA	NA	NA	NA	NA	NA	NA	NA	NA	NA	NA	NA	NA	NA	NA	NA	NA	NA	NA	NA	NA	NA	NA	NA
43	43_5	neg	neg	4	adult	SF	LU	60.6	148.3	1010	449	4.2	10.3	NA	NA	NA	NA	NA	NA	NA	NA	NA	NA	NA	NA	NA	NA	NA	NA	NA	NA	NA	NA	NA	NA	NA	NA
44	44_1	neg	neg	9	adult	SI	LU	60.6	148.3	1010	449	4.2	10.3	NA	NA	NA	NA	NA	NA	NA	NA	NA	NA	NA	NA	NA	NA	NA	NA	NA	NA	NA	NA	NA	NA	NA	NA
44	44_2	neg	neg	3	adult	SI	LU	60.6	148.3	1010	449	4.2	10.3	NA	NA	NA	NA	NA	NA	NA	NA	NA	NA	NA	NA	NA	NA	NA	NA	NA	NA	NA	NA	NA	NA	NA	NA
44	44_3	neg	neg	3	adult	SI	LU	60.6	148.3	1010	449	4.2	10.3	NA	NA	NA	NA	NA	NA	NA	NA	NA	NA	NA	NA	NA	NA	NA	NA	NA	NA	NA	NA	NA	NA	NA	NA
44	44_4	neg	neg	3	adult	SI	LU	60.6	148.3	1010	449	4.2	10.3	NA	NA	NA	NA	NA	NA	NA	NA	NA	NA	NA	NA	NA	NA	NA	NA	NA	NA	NA	NA	NA	NA	NA	NA
44	44_5	neg	neg	6	adult	SI	LU	60.6	148.3	1010	449	4.2	10.3	NA	NA	NA	NA	NA	NA	NA	NA	NA	NA	NA	NA	NA	NA	NA	NA	NA	NA	NA	NA	NA	NA	NA	NA
45	45_1	neg	neg	6	adult	SF	LU	60.6	148.3	1010	449	4.2	10.3	NA	NA	NA	NA	NA	NA	NA	NA	NA	NA	NA	NA	NA	NA	NA	NA	NA	NA	NA	NA	NA	NA	NA	NA
45	45_2	neg	neg	10	adult	SF	LU	60.6	148.3	1010	449	4.2	10.3	NA	NA	NA	NA	NA	NA	NA	NA	NA	NA	NA	NA	NA	NA	NA	NA	NA	NA	NA	NA	NA	NA	NA	NA
45	45_3	neg	neg	2	adult	SF	LU	60.6	148.3	1010	449	4.2	10.3	NA	NA	NA	NA	NA	NA	NA	NA	NA	NA	NA	NA	NA	NA	NA	NA	NA	NA	NA	NA	NA	NA	NA	NA
45	45_4	neg	neg	7	adult	SF	LU	60.6	148.3	1010	449	4.2	10.3	NA	NA	NA	NA	NA	NA	NA	NA	NA	NA	NA	NA	NA	NA	NA	NA	NA	NA	NA	NA	NA	NA	NA	NA
45	45_5	neg	neg	5	adult	SF	LU	60.6	148.3	1010	449	4.2	10.3	NA	NA	NA	NA	NA	NA	NA	NA	NA	NA	NA	NA	NA	NA	NA	NA	NA	NA	NA	NA	NA	NA	NA	NA
46	46_1	neg	pos	3	adult	SF	LU	82	27.4	1143	330	21.6	7.2	dairy	100	large	buying	Stable_Pen	no	ground	0	0	1	1	1	<25	closed	1	NA	0	1	1	0	0	0	1	0
46	46_2	neg	pos	8	adult	HO	LU	82	27.4	1143	330	21.6	7.2	dairy	100	large	buying	Stable_Pen	no	ground	0	0	1	1	1	<25	closed	1	NA	0	1	1	0	0	0	1	0
46	46_3	neg	pos	4	adult	RH	LU	82	27.4	1143	330	21.6	7.2	dairy	100	large	buying	Stable_Pen	no	ground	0	0	1	1	1	<25	closed	1	NA	0	1	1	0	0	0	1	0
46	46_4	pos	pos	5	adult	HO	LU	82	27.4	1143	330	21.6	7.2	dairy	100	large	buying	Stable_Pen	no	ground	0	0	1	1	1	<25	closed	1	NA	0	1	1	0	0	0	1	0
46	46_5	neg	pos	9	adult	SF	LU	82	27.4	1143	330	21.6	7.2	dairy	100	large	buying	Stable_Pen	no	ground	0	0	1	1	1	<25	closed	1	NA	0	1	1	0	0	0	1	0
47	47_1	neg	neg	3	adult	HO	LU	88.8	16.4	1095	184	20.2	3.7	dairy+beef	16	small	buying	Stable_Pen_Pasture	no	public	1	1	1	1	1	<25	closed	1	7	0	0	1	1	0	0	0	1
47	47_2	neg	neg	7	adult	RF	LU	88.8	16.4	1095	184	20.2	3.7	dairy+beef	16	small	buying	Stable_Pen_Pasture	no	public	1	1	1	1	1	<25	closed	1	7	0	0	1	1	0	0	0	1
47	47_3	neg	neg	2	adult	RH	LU	88.8	16.4	1095	184	20.2	3.7	dairy+beef	16	small	buying	Stable_Pen_Pasture	no	public	1	1	1	1	1	<25	closed	1	7	0	0	1	1	0	0	0	1
47	47_4	neg	neg	3	adult	RH	LU	88.8	16.4	1095	184	20.2	3.7	dairy+beef	16	small	buying	Stable_Pen_Pasture	no	public	1	1	1	1	1	<25	closed	1	7	0	0	1	1	0	0	0	1
47	47_5	neg	neg	3	adult	HO	LU	88.8	16.4	1095	184	20.2	3.7	dairy+beef	16	small	buying	Stable_Pen_Pasture	no	public	1	1	1	1	1	<25	closed	1	7	0	0	1	1	0	0	0	1
48	48_1	neg	neg	3	adult	BV	LU	108.8	38.7	1093	392	15.4	5.5	NA	NA	NA	NA	NA	NA	NA	NA	NA	NA	NA	NA	NA	NA	NA	NA	NA	NA	NA	NA	NA	NA	NA	NA
48	48_2	neg	neg	6	adult	BV	LU	108.8	38.7	1093	392	15.4	5.5	NA	NA	NA	NA	NA	NA	NA	NA	NA	NA	NA	NA	NA	NA	NA	NA	NA	NA	NA	NA	NA	NA	NA	NA
48	48_3	neg	neg	7	adult	BV	LU	108.8	38.7	1093	392	15.4	5.5	NA	NA	NA	NA	NA	NA	NA	NA	NA	NA	NA	NA	NA	NA	NA	NA	NA	NA	NA	NA	NA	NA	NA	NA
48	48_4	neg	neg	6	adult	HO	LU	108.8	38.7	1093	392	15.4	5.5	NA	NA	NA	NA	NA	NA	NA	NA	NA	NA	NA	NA	NA	NA	NA	NA	NA	NA	NA	NA	NA	NA	NA	NA
48	48_5	neg	neg	3	adult	BV	LU	108.8	38.7	1093	392	15.4	5.5	NA	NA	NA	NA	NA	NA	NA	NA	NA	NA	NA	NA	NA	NA	NA	NA	NA	NA	NA	NA	NA	NA	NA	NA
49	49_1	neg	neg	5	adult	RH	LU	111.4	71.6	1098	426	9.4	6.1	dairy	23	medium	heifer_rearing+buying	Stable_Pasture	no	ground	1	1	1	0	0	>50	closed	0	0	0	1	1	1	0	1	0	0
49	49_2	neg	neg	5	adult	HO	LU	111.4	71.6	1098	426	9.4	6.1	dairy	23	medium	heifer_rearing+buying	Stable_Pasture	no	ground	1	1	1	0	0	>50	closed	0	0	0	1	1	1	0	1	0	0
49	49_3	neg	neg	3	adult	HO	LU	111.4	71.6	1098	426	9.4	6.1	dairy	23	medium	heifer_rearing+buying	Stable_Pasture	no	ground	1	1	1	0	0	>50	closed	0	0	0	1	1	1	0	1	0	0
49	49_4	neg	neg	5	adult	RF	LU	111.4	71.6	1098	426	9.4	6.1	dairy	23	medium	heifer_rearing+buying	Stable_Pasture	no	ground	1	1	1	0	0	>50	closed	0	0	0	1	1	1	0	1	0	0
49	49_5	neg	neg	7	adult	RF	LU	111.4	71.6	1098	426	9.4	6.1	dairy	23	medium	heifer_rearing+buying	Stable_Pasture	no	ground	1	1	1	0	0	>50	closed	0	0	0	1	1	1	0	1	0	0
50	50_1	neg	neg	7	adult	RF	LU	86.6	262.6	1135	195	5.2	15.7	NA	NA	NA	NA	NA	NA	NA	NA	NA	NA	NA	NA	NA	NA	NA	NA	NA	NA	NA	NA	NA	NA	NA	NA
50	50_2	neg	neg	6	adult	RF	LU	86.6	262.6	1135	195	5.2	15.7	NA	NA	NA	NA	NA	NA	NA	NA	NA	NA	NA	NA	NA	NA	NA	NA	NA	NA	NA	NA	NA	NA	NA	NA
50	50_3	neg	neg	10	adult	RF	LU	86.6	262.6	1135	195	5.2	15.7	NA	NA	NA	NA	NA	NA	NA	NA	NA	NA	NA	NA	NA	NA	NA	NA	NA	NA	NA	NA	NA	NA	NA	NA
50	50_4	neg	neg	5	adult	RF	LU	86.6	262.6	1135	195	5.2	15.7	NA	NA	NA	NA	NA	NA	NA	NA	NA	NA	NA	NA	NA	NA	NA	NA	NA	NA	NA	NA	NA	NA	NA	NA
50	50_5	neg	neg	4	adult	RH	LU	86.6	262.6	1135	195	5.2	15.7	NA	NA	NA	NA	NA	NA	NA	NA	NA	NA	NA	NA	NA	NA	NA	NA	NA	NA	NA	NA	NA	NA	NA	NA
51	51_1	neg	neg	5	adult	BV	SO	17.7	2.6	2546	986	37.9	5.6	NA	NA	NA	NA	NA	NA	NA	NA	NA	NA	NA	NA	NA	NA	NA	NA	NA	NA	NA	NA	NA	NA	NA	NA
51	51_2	neg	neg	3	adult	BV	SO	17.7	2.6	2546	986	37.9	5.6	NA	NA	NA	NA	NA	NA	NA	NA	NA	NA	NA	NA	NA	NA	NA	NA	NA	NA	NA	NA	NA	NA	NA	NA
51	51_3	neg	neg	8	adult	RF	SO	17.7	2.6	2546	986	37.9	5.6	NA	NA	NA	NA	NA	NA	NA	NA	NA	NA	NA	NA	NA	NA	NA	NA	NA	NA	NA	NA	NA	NA	NA	NA
51	51_4	neg	neg	6	adult	BV	SO	17.7	2.6	2546	986	37.9	5.6	NA	NA	NA	NA	NA	NA	NA	NA	NA	NA	NA	NA	NA	NA	NA	NA	NA	NA	NA	NA	NA	NA	NA	NA
51	51_5	neg	neg	7	adult	BV	SO	17.7	2.6	2546	986	37.9	5.6	NA	NA	NA	NA	NA	NA	NA	NA	NA	NA	NA	NA	NA	NA	NA	NA	NA	NA	NA	NA	NA	NA	NA	NA
52	52_1	neg	neg	7	adult	HO	AG	41.7	14.4	4274	392	28.7	9.9	dairy	14	small	heifer_rearing	Stable_Pen_Pasture	no	public	1	1	0	0	0	>50	open	0	0	0	1	1	1	0	1	0	1
52	52_2	neg	neg	9	adult	SI	AG	41.7	14.4	4274	392	28.7	9.9	dairy	14	small	heifer_rearing	Stable_Pen_Pasture	no	public	1	1	0	0	0	>50	open	0	0	0	1	1	1	0	1	0	1
52	52_3	neg	neg	4	adult	BV	AG	41.7	14.4	4274	392	28.7	9.9	dairy	14	small	heifer_rearing	Stable_Pen_Pasture	no	public	1	1	0	0	0	>50	open	0	0	0	1	1	1	0	1	0	1
52	52_4	neg	neg	10	adult	MIX	AG	41.7	14.4	4274	392	28.7	9.9	dairy	14	small	heifer_rearing	Stable_Pen_Pasture	no	public	1	1	0	0	0	>50	open	0	0	0	1	1	1	0	1	0	1
52	52_5	neg	neg	5	adult	SI	AG	41.7	14.4	4274	392	28.7	9.9	dairy	14	small	heifer_rearing	Stable_Pen_Pasture	no	public	1	1	0	0	0	>50	open	0	0	0	1	1	1	0	1	0	1
53	53_1	neg	neg	2	adult	RH	AG	56	27.2	4275	97	22.2	10.8	NA	NA	NA	NA	NA	NA	NA	NA	NA	NA	NA	NA	NA	NA	NA	NA	NA	NA	NA	NA	NA	NA	NA	NA
53	53_2	neg	neg	5	adult	HO	AG	56	27.2	4275	97	22.2	10.8	NA	NA	NA	NA	NA	NA	NA	NA	NA	NA	NA	NA	NA	NA	NA	NA	NA	NA	NA	NA	NA	NA	NA	NA
53	53_3	neg	neg	5	adult	MB	AG	56	27.2	4275	97	22.2	10.8	NA	NA	NA	NA	NA	NA	NA	NA	NA	NA	NA	NA	NA	NA	NA	NA	NA	NA	NA	NA	NA	NA	NA	NA
53	53_4	neg	neg	3	adult	MB	AG	56	27.2	4275	97	22.2	10.8	NA	NA	NA	NA	NA	NA	NA	NA	NA	NA	NA	NA	NA	NA	NA	NA	NA	NA	NA	NA	NA	NA	NA	NA
53	53_5	neg	neg	5	adult	RH	AG	56	27.2	4275	97	22.2	10.8	NA	NA	NA	NA	NA	NA	NA	NA	NA	NA	NA	NA	NA	NA	NA	NA	NA	NA	NA	NA	NA	NA	NA	NA
54	54_1	neg	neg	5	adult	BV	AG	65.1	48.5	4143	196	22.7	16.9	NA	NA	NA	NA	NA	NA	NA	NA	NA	NA	NA	NA	NA	NA	NA	NA	NA	NA	NA	NA	NA	NA	NA	NA
54	54_2	neg	neg	3	adult	OB	AG	65.1	48.5	4143	196	22.7	16.9	NA	NA	NA	NA	NA	NA	NA	NA	NA	NA	NA	NA	NA	NA	NA	NA	NA	NA	NA	NA	NA	NA	NA	NA
54	54_3	neg	neg	6	adult	BV	AG	65.1	48.5	4143	196	22.7	16.9	NA	NA	NA	NA	NA	NA	NA	NA	NA	NA	NA	NA	NA	NA	NA	NA	NA	NA	NA	NA	NA	NA	NA	NA
54	54_4	neg	neg	2	adult	BV	AG	65.1	48.5	4143	196	22.7	16.9	NA	NA	NA	NA	NA	NA	NA	NA	NA	NA	NA	NA	NA	NA	NA	NA	NA	NA	NA	NA	NA	NA	NA	NA
54	54_5	neg	neg	4	adult	BV	AG	65.1	48.5	4143	196	22.7	16.9	NA	NA	NA	NA	NA	NA	NA	NA	NA	NA	NA	NA	NA	NA	NA	NA	NA	NA	NA	NA	NA	NA	NA	NA
55	55_1	neg	neg	0	< 1y	BV	AG	11.1	3.9	4091	138	24.3	8.6	dairy+beef	13	small	heifer_rearing+buying	Stable_Pen_Pasture	no	public_ground	1	1	1	1	1	>50	closed	0	0	0	0	0	0	0	0	0	0
55	55_2	neg	neg	5	adult	BV	AG	11.1	3.9	4091	138	24.3	8.6	dairy+beef	13	small	heifer_rearing+buying	Stable_Pen_Pasture	no	public_ground	1	1	1	1	1	>50	closed	0	0	0	0	0	0	0	0	0	0
55	55_3	neg	neg	7	adult	BV	AG	11.1	3.9	4091	138	24.3	8.6	dairy+beef	13	small	heifer_rearing+buying	Stable_Pen_Pasture	no	public_ground	1	1	1	1	1	>50	closed	0	0	0	0	0	0	0	0	0	0
55	55_4	neg	neg	6	adult	BV	AG	11.1	3.9	4091	138	24.3	8.6	dairy+beef	13	small	heifer_rearing+buying	Stable_Pen_Pasture	no	public_ground	1	1	1	1	1	>50	closed	0	0	0	0	0	0	0	0	0	0
55	55_5	neg	neg	4	adult	BV	AG	11.1	3.9	4091	138	24.3	8.6	dairy+beef	13	small	heifer_rearing+buying	Stable_Pen_Pasture	no	public_ground	1	1	1	1	1	>50	closed	0	0	0	0	0	0	0	0	0	0
56	56_1	neg	neg	7	adult	HO	AG	28.1	12.5	4134	154	26.1	11.6	dairy+beef	26	medium	heifer_rearing+buying	Stable_Pasture	no	ground	1	1	1	1	1	25to50	closed	0	0	0	1	1	1	0	0	0	1
56	56_2	neg	neg	9	adult	RF	AG	28.1	12.5	4134	154	26.1	11.6	dairy+beef	26	medium	heifer_rearing+buying	Stable_Pasture	no	ground	1	1	1	1	1	25to50	closed	0	0	0	1	1	1	0	0	0	1
56	56_3	neg	neg	10	adult	HO	AG	28.1	12.5	4134	154	26.1	11.6	dairy+beef	26	medium	heifer_rearing+buying	Stable_Pasture	no	ground	1	1	1	1	1	25to50	closed	0	0	0	1	1	1	0	0	0	1
56	56_4	neg	neg	7	adult	JY	AG	28.1	12.5	4134	154	26.1	11.6	dairy+beef	26	medium	heifer_rearing+buying	Stable_Pasture	no	ground	1	1	1	1	1	25to50	closed	0	0	0	1	1	1	0	0	0	1
56	56_5	neg	neg	3	adult	JY	AG	28.1	12.5	4134	154	26.1	11.6	dairy+beef	26	medium	heifer_rearing+buying	Stable_Pasture	no	ground	1	1	1	1	1	25to50	closed	0	0	0	1	1	1	0	0	0	1
57	57_1	neg	pos	2	adult	HO	AG	46.2	22.1	4256	92	18.3	8.8	NA	NA	NA	NA	NA	NA	NA	NA	NA	NA	NA	NA	NA	NA	NA	NA	NA	NA	NA	NA	NA	NA	NA	NA
57	57_2	pos	pos	11	adult	RF	AG	46.2	22.1	4256	92	18.3	8.8	NA	NA	NA	NA	NA	NA	NA	NA	NA	NA	NA	NA	NA	NA	NA	NA	NA	NA	NA	NA	NA	NA	NA	NA
57	57_3	neg	pos	9	adult	RF	AG	46.2	22.1	4256	92	18.3	8.8	NA	NA	NA	NA	NA	NA	NA	NA	NA	NA	NA	NA	NA	NA	NA	NA	NA	NA	NA	NA	NA	NA	NA	NA
57	57_4	neg	pos	2	adult	RH	AG	46.2	22.1	4256	92	18.3	8.8	NA	NA	NA	NA	NA	NA	NA	NA	NA	NA	NA	NA	NA	NA	NA	NA	NA	NA	NA	NA	NA	NA	NA	NA
57	57_5	pos	pos	6	adult	RF	AG	46.2	22.1	4256	92	18.3	8.8	NA	NA	NA	NA	NA	NA	NA	NA	NA	NA	NA	NA	NA	NA	NA	NA	NA	NA	NA	NA	NA	NA	NA	NA
58	58_1	neg	neg	8	adult	HO	AG	51.4	19	4230	120	26.3	9.7	NA	NA	NA	NA	NA	NA	NA	NA	NA	NA	NA	NA	NA	NA	NA	NA	NA	NA	NA	NA	NA	NA	NA	NA
58	58_2	neg	neg	8	adult	HO	AG	51.4	19	4230	120	26.3	9.7	NA	NA	NA	NA	NA	NA	NA	NA	NA	NA	NA	NA	NA	NA	NA	NA	NA	NA	NA	NA	NA	NA	NA	NA
58	58_3	neg	neg	4	adult	RH	AG	51.4	19	4230	120	26.3	9.7	NA	NA	NA	NA	NA	NA	NA	NA	NA	NA	NA	NA	NA	NA	NA	NA	NA	NA	NA	NA	NA	NA	NA	NA
58	58_4	neg	neg	3	adult	HO	AG	51.4	19	4230	120	26.3	9.7	NA	NA	NA	NA	NA	NA	NA	NA	NA	NA	NA	NA	NA	NA	NA	NA	NA	NA	NA	NA	NA	NA	NA	NA
58	58_5	neg	neg	8	adult	HO	AG	51.4	19	4230	120	26.3	9.7	NA	NA	NA	NA	NA	NA	NA	NA	NA	NA	NA	NA	NA	NA	NA	NA	NA	NA	NA	NA	NA	NA	NA	NA
59	59_1	neg	neg	12	adult	BV	AG	97.8	38	4223	170	19.9	7.7	dairy+beef	30	medium	heifer_rearing	Stable_Pen_Pasture	yes	public_ground	1	1	1	1	1	<25	closed	0	0	0	1	1	0	0	0	0	1
59	59_2	neg	neg	9	adult	BV	AG	97.8	38	4223	170	19.9	7.7	dairy+beef	30	medium	heifer_rearing	Stable_Pen_Pasture	yes	public_ground	1	1	1	1	1	<25	closed	0	0	0	1	1	0	0	0	0	1
59	59_3	neg	neg	5	adult	BV	AG	97.8	38	4223	170	19.9	7.7	dairy+beef	30	medium	heifer_rearing	Stable_Pen_Pasture	yes	public_ground	1	1	1	1	1	<25	closed	0	0	0	1	1	0	0	0	0	1
59	59_4	neg	neg	5	adult	RH	AG	97.8	38	4223	170	19.9	7.7	dairy+beef	30	medium	heifer_rearing	Stable_Pen_Pasture	yes	public_ground	1	1	1	1	1	<25	closed	0	0	0	1	1	0	0	0	0	1
59	59_5	neg	neg	6	adult	BV	AG	97.8	38	4223	170	19.9	7.7	dairy+beef	30	medium	heifer_rearing	Stable_Pen_Pasture	yes	public_ground	1	1	1	1	1	<25	closed	0	0	0	1	1	0	0	0	0	1
60	60_1	neg	neg	2	adult	BV	AG	16.3	0.9	356	575	75.4	4.4	dairy	90	large	heifer_rearing+buying	Stable_Pasture	yes	public	1	1	0	0	1	<25	closed	0	0	0	1	1	1	1	0	1	1
60	60_2	neg	neg	9	adult	BV	AG	16.3	0.9	356	575	75.4	4.4	dairy	90	large	heifer_rearing+buying	Stable_Pasture	yes	public	1	1	0	0	1	<25	closed	0	0	0	1	1	1	1	0	1	1
60	60_3	neg	neg	6	adult	BV	AG	16.3	0.9	356	575	75.4	4.4	dairy	90	large	heifer_rearing+buying	Stable_Pasture	yes	public	1	1	0	0	1	<25	closed	0	0	0	1	1	1	1	0	1	1
60	60_4	neg	neg	4	adult	HO	AG	16.3	0.9	356	575	75.4	4.4	dairy	90	large	heifer_rearing+buying	Stable_Pasture	yes	public	1	1	0	0	1	<25	closed	0	0	0	1	1	1	1	0	1	1
60	60_5	neg	neg	2	adult	HO	AG	16.3	0.9	356	575	75.4	4.4	dairy	90	large	heifer_rearing+buying	Stable_Pasture	yes	public	1	1	0	0	1	<25	closed	0	0	0	1	1	1	1	0	1	1
61	61_1	neg	neg	3	adult	RH	AG	57.5	5.6	4139	557	87.3	8.5	dairy+beef	110	large	heifer_rearing+buying	Stable_Pen_Pasture	partly	ground	1	1	1	1	1	<25	closed	1	12	0	1	1	1	0	0	1	1
61	61_2	neg	neg	3	adult	RH	AG	57.5	5.6	4139	557	87.3	8.5	dairy+beef	110	large	heifer_rearing+buying	Stable_Pen_Pasture	partly	ground	1	1	1	1	1	<25	closed	1	12	0	1	1	1	0	0	1	1
61	61_3	neg	neg	8	adult	RF	AG	57.5	5.6	4139	557	87.3	8.5	dairy+beef	110	large	heifer_rearing+buying	Stable_Pen_Pasture	partly	ground	1	1	1	1	1	<25	closed	1	12	0	1	1	1	0	0	1	1
61	61_4	neg	neg	5	adult	HO	AG	57.5	5.6	4139	557	87.3	8.5	dairy+beef	110	large	heifer_rearing+buying	Stable_Pen_Pasture	partly	ground	1	1	1	1	1	<25	closed	1	12	0	1	1	1	0	0	1	1
61	61_5	neg	neg	4	adult	HO	AG	57.5	5.6	4139	557	87.3	8.5	dairy+beef	110	large	heifer_rearing+buying	Stable_Pen_Pasture	partly	ground	1	1	1	1	1	<25	closed	1	12	0	1	1	1	0	0	1	1
62	62_1	neg	neg	8	adult	BV	ZH	46.1	7.9	5	206	31.5	5.4	dairy	65	large	heifer_rearing+buying	Stable_Pen_Pasture	no	public_ground	1	1	1	1	1	<25	open	1	3	0	1	0	0	0	0	0	1
62	62_2	neg	neg	5	adult	BV	ZH	46.1	7.9	5	206	31.5	5.4	dairy	65	large	heifer_rearing+buying	Stable_Pen_Pasture	no	public_ground	1	1	1	1	1	<25	open	1	3	0	1	0	0	0	0	0	1
62	62_3	neg	neg	6	adult	HO	ZH	46.1	7.9	5	206	31.5	5.4	dairy	65	large	heifer_rearing+buying	Stable_Pen_Pasture	no	public_ground	1	1	1	1	1	<25	open	1	3	0	1	0	0	0	0	0	1
62	62_4	neg	neg	4	adult	HO	ZH	46.1	7.9	5	206	31.5	5.4	dairy	65	large	heifer_rearing+buying	Stable_Pen_Pasture	no	public_ground	1	1	1	1	1	<25	open	1	3	0	1	0	0	0	0	0	1
62	62_5	neg	neg	3	adult	HO	ZH	46.1	7.9	5	206	31.5	5.4	dairy	65	large	heifer_rearing+buying	Stable_Pen_Pasture	no	public_ground	1	1	1	1	1	<25	open	1	3	0	1	0	0	0	0	0	1
63	63_1	neg	neg	3	adult	MB	ZH	50.2	15.3	59	120	19.4	5.9	NA	NA	NA	NA	NA	NA	NA	NA	NA	NA	NA	NA	NA	NA	NA	NA	NA	NA	NA	NA	NA	NA	NA	NA
63	63_2	neg	neg	6	adult	RF	ZH	50.2	15.3	59	120	19.4	5.9	NA	NA	NA	NA	NA	NA	NA	NA	NA	NA	NA	NA	NA	NA	NA	NA	NA	NA	NA	NA	NA	NA	NA	NA
63	63_3	neg	neg	3	adult	RH	ZH	50.2	15.3	59	120	19.4	5.9	NA	NA	NA	NA	NA	NA	NA	NA	NA	NA	NA	NA	NA	NA	NA	NA	NA	NA	NA	NA	NA	NA	NA	NA
63	63_4	neg	neg	6	adult	RF	ZH	50.2	15.3	59	120	19.4	5.9	NA	NA	NA	NA	NA	NA	NA	NA	NA	NA	NA	NA	NA	NA	NA	NA	NA	NA	NA	NA	NA	NA	NA	NA
63	63_5	neg	neg	0	< 1y	RF	ZH	50.2	15.3	59	120	19.4	5.9	NA	NA	NA	NA	NA	NA	NA	NA	NA	NA	NA	NA	NA	NA	NA	NA	NA	NA	NA	NA	NA	NA	NA	NA
64	64_1	neg	neg	3	adult	HO	ZG	73.6	15.5	1703	461	25	5.3	NA	NA	NA	NA	NA	NA	NA	NA	NA	NA	NA	NA	NA	NA	NA	NA	NA	NA	NA	NA	NA	NA	NA	NA
64	64_2	neg	neg	3	adult	HO	ZG	73.6	15.5	1703	461	25	5.3	NA	NA	NA	NA	NA	NA	NA	NA	NA	NA	NA	NA	NA	NA	NA	NA	NA	NA	NA	NA	NA	NA	NA	NA
64	64_3	neg	neg	10	adult	HO	ZG	73.6	15.5	1703	461	25	5.3	NA	NA	NA	NA	NA	NA	NA	NA	NA	NA	NA	NA	NA	NA	NA	NA	NA	NA	NA	NA	NA	NA	NA	NA
64	64_4	neg	neg	3	adult	HO	ZG	73.6	15.5	1703	461	25	5.3	NA	NA	NA	NA	NA	NA	NA	NA	NA	NA	NA	NA	NA	NA	NA	NA	NA	NA	NA	NA	NA	NA	NA	NA
64	64_5	neg	neg	2	adult	HO	ZG	73.6	15.5	1703	461	25	5.3	NA	NA	NA	NA	NA	NA	NA	NA	NA	NA	NA	NA	NA	NA	NA	NA	NA	NA	NA	NA	NA	NA	NA	NA
65	65_1	neg	neg	3	adult	OB	ZG	84.8	51.4	1704	279	10.1	6.1	dairy+beef	30	medium	heifer_rearing	Stable_Pen_Pasture	partly	ground	1	1	1	1	1	25to50	open	1	NA	1	1	1	1	0	0	0	1
65	65_2	neg	neg	8	adult	BV	ZG	84.8	51.4	1704	279	10.1	6.1	dairy+beef	30	medium	heifer_rearing	Stable_Pen_Pasture	partly	ground	1	1	1	1	1	25to50	open	1	NA	1	1	1	1	0	0	0	1
65	65_3	neg	neg	8	adult	BV	ZG	84.8	51.4	1704	279	10.1	6.1	dairy+beef	30	medium	heifer_rearing	Stable_Pen_Pasture	partly	ground	1	1	1	1	1	25to50	open	1	NA	1	1	1	1	0	0	0	1
65	65_4	neg	neg	13	adult	BV	ZG	84.8	51.4	1704	279	10.1	6.1	dairy+beef	30	medium	heifer_rearing	Stable_Pen_Pasture	partly	ground	1	1	1	1	1	25to50	open	1	NA	1	1	1	1	0	0	0	1
65	65_5	neg	neg	4	adult	BV	ZG	84.8	51.4	1704	279	10.1	6.1	dairy+beef	30	medium	heifer_rearing	Stable_Pen_Pasture	partly	ground	1	1	1	1	1	25to50	open	1	NA	1	1	1	1	0	0	0	1
66	66_1	neg	neg	2	adult	HO	ZG	58.6	27.6	1706	434	14.4	6.8	dairy	20	small	heifer_rearing	Stable_Pen_Pasture	no	ground	1	1	1	0	1	<25	open	1	1	0	1	1	1	0	0	0	1
66	66_2	neg	neg	2	adult	HO	ZG	58.6	27.6	1706	434	14.4	6.8	dairy	20	small	heifer_rearing	Stable_Pen_Pasture	no	ground	1	1	1	0	1	<25	open	1	1	0	1	1	1	0	0	0	1
66	66_3	neg	neg	6	adult	HO	ZG	58.6	27.6	1706	434	14.4	6.8	dairy	20	small	heifer_rearing	Stable_Pen_Pasture	no	ground	1	1	1	0	1	<25	open	1	1	0	1	1	1	0	0	0	1
66	66_4	neg	neg	2	adult	HO	ZG	58.6	27.6	1706	434	14.4	6.8	dairy	20	small	heifer_rearing	Stable_Pen_Pasture	no	ground	1	1	1	0	1	<25	open	1	1	0	1	1	1	0	0	0	1
66	66_5	neg	neg	2	adult	HO	ZG	58.6	27.6	1706	434	14.4	6.8	dairy	20	small	heifer_rearing	Stable_Pen_Pasture	no	ground	1	1	1	0	1	<25	open	1	1	0	1	1	1	0	0	0	1
67	67_1	neg	neg	6	adult	RF	ZH	23.3	4.2	64	383	38.1	6.8	dairy	54	large	buying	Stable_Pen_Pasture	no	ground	1	1	1	1	1	<25	closed	1	6	0	0	1	0	0	0	1	1
67	67_2	neg	neg	3	adult	RH	ZH	23.3	4.2	64	383	38.1	6.8	dairy	54	large	buying	Stable_Pen_Pasture	no	ground	1	1	1	1	1	<25	closed	1	6	0	0	1	0	0	0	1	1
67	67_3	neg	neg	6	adult	RF	ZH	23.3	4.2	64	383	38.1	6.8	dairy	54	large	buying	Stable_Pen_Pasture	no	ground	1	1	1	1	1	<25	closed	1	6	0	0	1	0	0	0	1	1
67	67_4	neg	neg	8	adult	RF	ZH	23.3	4.2	64	383	38.1	6.8	dairy	54	large	buying	Stable_Pen_Pasture	no	ground	1	1	1	1	1	<25	closed	1	6	0	0	1	0	0	0	1	1
67	67_5	neg	neg	2	adult	RH	ZH	23.3	4.2	64	383	38.1	6.8	dairy	54	large	buying	Stable_Pen_Pasture	no	ground	1	1	1	1	1	<25	closed	1	6	0	0	1	0	0	0	1	1
68	68_1	neg	neg	6	adult	BV	ZH	17.7	1.1	230	3612	53.1	3.2	NA	NA	NA	NA	NA	NA	NA	NA	NA	NA	NA	NA	NA	NA	NA	NA	NA	NA	NA	NA	NA	NA	NA	NA
68	68_2	neg	neg	6	adult	BV	ZH	17.7	1.1	230	3612	53.1	3.2	NA	NA	NA	NA	NA	NA	NA	NA	NA	NA	NA	NA	NA	NA	NA	NA	NA	NA	NA	NA	NA	NA	NA	NA
68	68_3	neg	neg	4	adult	BV	ZH	17.7	1.1	230	3612	53.1	3.2	NA	NA	NA	NA	NA	NA	NA	NA	NA	NA	NA	NA	NA	NA	NA	NA	NA	NA	NA	NA	NA	NA	NA	NA
68	68_4	neg	neg	6	adult	BV	ZH	17.7	1.1	230	3612	53.1	3.2	NA	NA	NA	NA	NA	NA	NA	NA	NA	NA	NA	NA	NA	NA	NA	NA	NA	NA	NA	NA	NA	NA	NA	NA
68	68_5	neg	neg	12	adult	BV	ZH	17.7	1.1	230	3612	53.1	3.2	NA	NA	NA	NA	NA	NA	NA	NA	NA	NA	NA	NA	NA	NA	NA	NA	NA	NA	NA	NA	NA	NA	NA	NA
69	69_1	neg	neg	NA	adult	BV	ZH	32.5	2.6	198	1316	46.2	3.7	dairy+beef	65	large	heifer_rearing	Stable_Pen_Pasture	yes	ground	1	1	1	1	1	25to50	open	1	1.5	0	0	0	0	0	0	0	1
69	69_2	neg	neg	NA	adult	BV	ZH	32.5	2.6	198	1316	46.2	3.7	dairy+beef	65	large	heifer_rearing	Stable_Pen_Pasture	yes	ground	1	1	1	1	1	25to50	open	1	1.5	0	0	0	0	0	0	0	1
69	69_3	neg	neg	6	adult	BV	ZH	32.5	2.6	198	1316	46.2	3.7	dairy+beef	65	large	heifer_rearing	Stable_Pen_Pasture	yes	ground	1	1	1	1	1	25to50	open	1	1.5	0	0	0	0	0	0	0	1
69	69_4	neg	neg	7	adult	BV	ZH	32.5	2.6	198	1316	46.2	3.7	dairy+beef	65	large	heifer_rearing	Stable_Pen_Pasture	yes	ground	1	1	1	1	1	25to50	open	1	1.5	0	0	0	0	0	0	0	1
69	69_5	neg	neg	NA	adult	BV	ZH	32.5	2.6	198	1316	46.2	3.7	dairy+beef	65	large	heifer_rearing	Stable_Pen_Pasture	yes	ground	1	1	1	1	1	25to50	open	1	1.5	0	0	0	0	0	0	0	1
70	70_1	neg	neg	5	adult	SI	ZH	69.9	12.4	115	726	39.8	7.1	beef	12	small	heifer_rearing+buying	Stable_Pasture	yes	public	1	1	1	0	0	>50	open	1	3	0	1	1	1	0	1	0	1
70	70_2	neg	neg	11	adult	SI	ZH	69.9	12.4	115	726	39.8	7.1	beef	12	small	heifer_rearing+buying	Stable_Pasture	yes	public	1	1	1	0	0	>50	open	1	3	0	1	1	1	0	1	0	1
70	70_3	neg	neg	8	adult	BV	ZH	69.9	12.4	115	726	39.8	7.1	beef	12	small	heifer_rearing+buying	Stable_Pasture	yes	public	1	1	1	0	0	>50	open	1	3	0	1	1	1	0	1	0	1
70	70_4	neg	neg	3	adult	BV	ZH	69.9	12.4	115	726	39.8	7.1	beef	12	small	heifer_rearing+buying	Stable_Pasture	yes	public	1	1	1	0	0	>50	open	1	3	0	1	1	1	0	1	0	1
70	70_5	neg	neg	2	adult	BV	ZH	69.9	12.4	115	726	39.8	7.1	beef	12	small	heifer_rearing+buying	Stable_Pasture	yes	public	1	1	1	0	0	>50	open	1	3	0	1	1	1	0	1	0	1
71	71_1	neg	neg	3	adult	BV	ZH	68.4	16.9	120	714	28.3	7	dairy	32	medium	heifer_rearing	Stable_Pen_Pasture	partly	public	1	1	1	1	1	>50	open	1	5	0	1	1	1	0	0	0	1
71	71_2	neg	neg	7	adult	RF	ZH	68.4	16.9	120	714	28.3	7	dairy	32	medium	heifer_rearing	Stable_Pen_Pasture	partly	public	1	1	1	1	1	>50	open	1	5	0	1	1	1	0	0	0	1
71	71_3	neg	neg	4	adult	BV	ZH	68.4	16.9	120	714	28.3	7	dairy	32	medium	heifer_rearing	Stable_Pen_Pasture	partly	public	1	1	1	1	1	>50	open	1	5	0	1	1	1	0	0	0	1
71	71_4	neg	neg	4	adult	SF	ZH	68.4	16.9	120	714	28.3	7	dairy	32	medium	heifer_rearing	Stable_Pen_Pasture	partly	public	1	1	1	1	1	>50	open	1	5	0	1	1	1	0	0	0	1
71	71_5	neg	neg	6	adult	BV	ZH	68.4	16.9	120	714	28.3	7	dairy	32	medium	heifer_rearing	Stable_Pen_Pasture	partly	public	1	1	1	1	1	>50	open	1	5	0	1	1	1	0	0	0	1
72	72_1	neg	neg	8	adult	BV	ZH	68.4	16.9	120	714	28.3	7	dairy	76	large	heifer_rearing	Stable_Pasture	partly	public	1	1	1	1	1	25to50	closed	0	0	0	1	1	0	0	0	0	1
72	72_2	neg	neg	7	adult	BV	ZH	68.4	16.9	120	714	28.3	7	dairy	76	large	heifer_rearing	Stable_Pasture	partly	public	1	1	1	1	1	25to50	closed	0	0	0	1	1	0	0	0	0	1
72	72_3	neg	neg	3	adult	BV	ZH	68.4	16.9	120	714	28.3	7	dairy	76	large	heifer_rearing	Stable_Pasture	partly	public	1	1	1	1	1	25to50	closed	0	0	0	1	1	0	0	0	0	1
72	72_4	neg	neg	4	adult	BV	ZH	68.4	16.9	120	714	28.3	7	dairy	76	large	heifer_rearing	Stable_Pasture	partly	public	1	1	1	1	1	25to50	closed	0	0	0	1	1	0	0	0	0	1
72	72_5	neg	neg	8	adult	BV	ZH	68.4	16.9	120	714	28.3	7	dairy	76	large	heifer_rearing	Stable_Pasture	partly	public	1	1	1	1	1	25to50	closed	0	0	0	1	1	0	0	0	0	1
73	73_1	neg	neg	6	adult	BV	ZH	33.9	41	114	273	9	10.9	dairy	22	small	heifer_rearing	Stable_Pen_Pasture	yes	public	1	1	1	1	1	>50	open	1	3	0	1	0	1	0	0	0	1
73	73_2	neg	neg	7	adult	BV	ZH	33.9	41	114	273	9	10.9	dairy	22	small	heifer_rearing	Stable_Pen_Pasture	yes	public	1	1	1	1	1	>50	open	1	3	0	1	0	1	0	0	0	1
73	73_3	neg	neg	6	adult	BV	ZH	33.9	41	114	273	9	10.9	dairy	22	small	heifer_rearing	Stable_Pen_Pasture	yes	public	1	1	1	1	1	>50	open	1	3	0	1	0	1	0	0	0	1
73	73_4	neg	neg	4	adult	BV	ZH	33.9	41	114	273	9	10.9	dairy	22	small	heifer_rearing	Stable_Pen_Pasture	yes	public	1	1	1	1	1	>50	open	1	3	0	1	0	1	0	0	0	1
73	73_5	neg	neg	4	adult	BV	ZH	33.9	41	114	273	9	10.9	dairy	22	small	heifer_rearing	Stable_Pen_Pasture	yes	public	1	1	1	1	1	>50	open	1	3	0	1	0	1	0	0	0	1
74	74_1	neg	neg	4	adult	HO	ZH	57.4	8.3	172	390	41.2	5.9	dairy	160	large	heifer_rearing	Stable_Pen_Pasture	partly	public	1	1	0	0	1	25to50	closed	1	NA	1	1	1	0	0	0	0	1
74	74_2	neg	neg	4	adult	RH	ZH	57.4	8.3	172	390	41.2	5.9	dairy	160	large	heifer_rearing	Stable_Pen_Pasture	partly	public	1	1	0	0	1	25to50	closed	1	NA	1	1	1	0	0	0	0	1
74	74_3	neg	neg	4	adult	HO	ZH	57.4	8.3	172	390	41.2	5.9	dairy	160	large	heifer_rearing	Stable_Pen_Pasture	partly	public	1	1	0	0	1	25to50	closed	1	NA	1	1	1	0	0	0	0	1
74	74_4	neg	neg	4	adult	BV	ZH	57.4	8.3	172	390	41.2	5.9	dairy	160	large	heifer_rearing	Stable_Pen_Pasture	partly	public	1	1	0	0	1	25to50	closed	1	NA	1	1	1	0	0	0	0	1
74	74_5	neg	neg	5	adult	RH	ZH	57.4	8.3	172	390	41.2	5.9	dairy	160	large	heifer_rearing	Stable_Pen_Pasture	partly	public	1	1	0	0	1	25to50	closed	1	NA	1	1	1	0	0	0	0	1
75	75_1	neg	neg	5	adult	BV	SZ	51.6	15.3	1345	247	21.4	6.3	NA	NA	NA	NA	NA	NA	NA	NA	NA	NA	NA	NA	NA	NA	NA	NA	NA	NA	NA	NA	NA	NA	NA	NA
75	75_2	neg	neg	3	adult	BV	SZ	51.6	15.3	1345	247	21.4	6.3	NA	NA	NA	NA	NA	NA	NA	NA	NA	NA	NA	NA	NA	NA	NA	NA	NA	NA	NA	NA	NA	NA	NA	NA
75	75_3	neg	neg	7	adult	BV	SZ	51.6	15.3	1345	247	21.4	6.3	NA	NA	NA	NA	NA	NA	NA	NA	NA	NA	NA	NA	NA	NA	NA	NA	NA	NA	NA	NA	NA	NA	NA	NA
75	75_4	neg	neg	5	adult	BV	SZ	51.6	15.3	1345	247	21.4	6.3	NA	NA	NA	NA	NA	NA	NA	NA	NA	NA	NA	NA	NA	NA	NA	NA	NA	NA	NA	NA	NA	NA	NA	NA
75	75_5	neg	neg	7	adult	BV	SZ	51.6	15.3	1345	247	21.4	6.3	NA	NA	NA	NA	NA	NA	NA	NA	NA	NA	NA	NA	NA	NA	NA	NA	NA	NA	NA	NA	NA	NA	NA	NA
76	76_1	neg	neg	4	adult	BV	SZ	38.6	106.5	1348	114	4.1	11.2	dairy	40	large	heifer_rearing+buying	Stable_Pasture	yes	public	1	1	0	0	1	>50	open	1	5	1	1	1	1	1	0	1	1
76	76_2	neg	neg	5	adult	BV	SZ	38.6	106.5	1348	114	4.1	11.2	dairy	40	large	heifer_rearing+buying	Stable_Pasture	yes	public	1	1	0	0	1	>50	open	1	5	1	1	1	1	1	0	1	1
76	76_3	neg	neg	7	adult	BV	SZ	38.6	106.5	1348	114	4.1	11.2	dairy	40	large	heifer_rearing+buying	Stable_Pasture	yes	public	1	1	0	0	1	>50	open	1	5	1	1	1	1	1	0	1	1
76	76_4	neg	neg	2	adult	BV	SZ	38.6	106.5	1348	114	4.1	11.2	dairy	40	large	heifer_rearing+buying	Stable_Pasture	yes	public	1	1	0	0	1	>50	open	1	5	1	1	1	1	1	0	1	1
76	76_5	neg	neg	4	adult	BV	SZ	38.6	106.5	1348	114	4.1	11.2	dairy	40	large	heifer_rearing+buying	Stable_Pasture	yes	public	1	1	0	0	1	>50	open	1	5	1	1	1	1	1	0	1	1
77	77_1	neg	neg	7	adult	BV	OW	33.7	49.2	1404	367	4	5.8	dairy+beef	19	small	heifer_rearing	Stable_Pen_Pasture	yes	ground	1	1	1	1	1	>50	closed	1	NA	1	0	0	0	0	0	1	1
77	77_2	neg	neg	3	adult	BV	OW	33.7	49.2	1404	367	4	5.8	dairy+beef	19	small	heifer_rearing	Stable_Pen_Pasture	yes	ground	1	1	1	1	1	>50	closed	1	NA	1	0	0	0	0	0	1	1
77	77_3	neg	neg	7	adult	BV	OW	33.7	49.2	1404	367	4	5.8	dairy+beef	19	small	heifer_rearing	Stable_Pen_Pasture	yes	ground	1	1	1	1	1	>50	closed	1	NA	1	0	0	0	0	0	1	1
77	77_4	neg	neg	3	adult	BV	OW	33.7	49.2	1404	367	4	5.8	dairy+beef	19	small	heifer_rearing	Stable_Pen_Pasture	yes	ground	1	1	1	1	1	>50	closed	1	NA	1	0	0	0	0	0	1	1
77	77_5	neg	neg	2	adult	BV	OW	33.7	49.2	1404	367	4	5.8	dairy+beef	19	small	heifer_rearing	Stable_Pen_Pasture	yes	ground	1	1	1	1	1	>50	closed	1	NA	1	0	0	0	0	0	1	1
78	78_1	neg	neg	9	adult	BV	OW	33.7	49.2	1404	367	4	5.8	dairy	20	small	heifer_rearing+buying	Stable_Pen_Pasture	yes	public	1	1	0	0	1	>50	closed	1	1	1	0	0	0	0	0	1	1
78	78_2	neg	neg	3	adult	BV	OW	33.7	49.2	1404	367	4	5.8	dairy	20	small	heifer_rearing+buying	Stable_Pen_Pasture	yes	public	1	1	0	0	1	>50	closed	1	1	1	0	0	0	0	0	1	1
78	78_3	neg	neg	8	adult	BV	OW	33.7	49.2	1404	367	4	5.8	dairy	20	small	heifer_rearing+buying	Stable_Pen_Pasture	yes	public	1	1	0	0	1	>50	closed	1	1	1	0	0	0	0	0	1	1
78	78_4	neg	neg	10	adult	BV	OW	33.7	49.2	1404	367	4	5.8	dairy	20	small	heifer_rearing+buying	Stable_Pen_Pasture	yes	public	1	1	0	0	1	>50	closed	1	1	1	0	0	0	0	0	1	1
78	78_5	neg	neg	4	adult	BV	OW	33.7	49.2	1404	367	4	5.8	dairy	20	small	heifer_rearing+buying	Stable_Pen_Pasture	yes	public	1	1	0	0	1	>50	closed	1	1	1	0	0	0	0	0	1	1
79	79_1	neg	neg	6	adult	HO	NW	50.4	6.8	1509	221	19.9	2.7	dairy	42	large	heifer_rearing+buying	Stable_Pen_Pasture	NA	public	1	1	1	1	0	>50	closed	1	4	1	0	0	0	0	0	0	1
79	79_2	neg	neg	6	adult	HO	NW	50.4	6.8	1509	221	19.9	2.7	dairy	42	large	heifer_rearing+buying	Stable_Pen_Pasture	NA	public	1	1	1	1	0	>50	closed	1	4	1	0	0	0	0	0	0	1
79	79_3	neg	neg	4	adult	HO	NW	50.4	6.8	1509	221	19.9	2.7	dairy	42	large	heifer_rearing+buying	Stable_Pen_Pasture	NA	public	1	1	1	1	0	>50	closed	1	4	1	0	0	0	0	0	0	1
79	79_4	neg	neg	3	adult	HO	NW	50.4	6.8	1509	221	19.9	2.7	dairy	42	large	heifer_rearing+buying	Stable_Pen_Pasture	NA	public	1	1	1	1	0	>50	closed	1	4	1	0	0	0	0	0	0	1
79	79_5	neg	neg	4	adult	HO	NW	50.4	6.8	1509	221	19.9	2.7	dairy	42	large	heifer_rearing+buying	Stable_Pen_Pasture	NA	public	1	1	1	1	0	>50	closed	1	4	1	0	0	0	0	0	0	1
80	80_1	neg	pos	4	adult	HO	NW	50.4	6.8	1509	221	19.9	2.7	dairy+beef	16	small	buying	Stable_Pasture	yes	public	1	1	1	1	1	<25	open	0	0	0	1	1	0	0	0	0	0
80	80_2	pos	pos	7	adult	BV	NW	50.4	6.8	1509	221	19.9	2.7	dairy+beef	16	small	buying	Stable_Pasture	yes	public	1	1	1	1	1	<25	open	0	0	0	1	1	0	0	0	0	0
80	80_3	neg	pos	4	adult	OB	NW	50.4	6.8	1509	221	19.9	2.7	dairy+beef	16	small	buying	Stable_Pasture	yes	public	1	1	1	1	1	<25	open	0	0	0	1	1	0	0	0	0	0
80	80_4	neg	pos	5	adult	BV	NW	50.4	6.8	1509	221	19.9	2.7	dairy+beef	16	small	buying	Stable_Pasture	yes	public	1	1	1	1	1	<25	open	0	0	0	1	1	0	0	0	0	0
80	80_5	neg	pos	4	adult	HO	NW	50.4	6.8	1509	221	19.9	2.7	dairy+beef	16	small	buying	Stable_Pasture	yes	public	1	1	1	1	1	<25	open	0	0	0	1	1	0	0	0	0	0
81	81_1	neg	neg	7	adult	BV	SZ	63	21.7	1362	624	14.8	5.1	NA	NA	NA	NA	NA	NA	NA	NA	NA	NA	NA	NA	NA	NA	NA	NA	NA	NA	NA	NA	NA	NA	NA	NA
81	81_2	neg	neg	2	adult	BV	SZ	63	21.7	1362	624	14.8	5.1	NA	NA	NA	NA	NA	NA	NA	NA	NA	NA	NA	NA	NA	NA	NA	NA	NA	NA	NA	NA	NA	NA	NA	NA
81	81_3	neg	neg	3	adult	BV	SZ	63	21.7	1362	624	14.8	5.1	NA	NA	NA	NA	NA	NA	NA	NA	NA	NA	NA	NA	NA	NA	NA	NA	NA	NA	NA	NA	NA	NA	NA	NA
81	81_4	neg	neg	5	adult	BV	SZ	63	21.7	1362	624	14.8	5.1	NA	NA	NA	NA	NA	NA	NA	NA	NA	NA	NA	NA	NA	NA	NA	NA	NA	NA	NA	NA	NA	NA	NA	NA
81	81_5	neg	neg	5	adult	BV	SZ	63	21.7	1362	624	14.8	5.1	NA	NA	NA	NA	NA	NA	NA	NA	NA	NA	NA	NA	NA	NA	NA	NA	NA	NA	NA	NA	NA	NA	NA	NA
82	82_1	neg	neg	7	adult	BV	SZ	70.2	63.4	1371	156	9	8.1	beef	8	small	heifer_rearing	Stable_Pen_Pasture	yes	ground	1	1	1	1	1	<25	open	1	1	0	1	1	0	0	0	0	1
82	82_2	neg	neg	3	adult	BV	SZ	70.2	63.4	1371	156	9	8.1	beef	8	small	heifer_rearing	Stable_Pen_Pasture	yes	ground	1	1	1	1	1	<25	open	1	1	0	1	1	0	0	0	0	1
82	82_3	neg	neg	2	adult	BV	SZ	70.2	63.4	1371	156	9	8.1	beef	8	small	heifer_rearing	Stable_Pen_Pasture	yes	ground	1	1	1	1	1	<25	open	1	1	0	1	1	0	0	0	0	1
82	82_4	neg	neg	1	1y	OB	SZ	70.2	63.4	1371	156	9	8.1	beef	8	small	heifer_rearing	Stable_Pen_Pasture	yes	ground	1	1	1	1	1	<25	open	1	1	0	1	1	0	0	0	0	1
82	82_5	neg	neg	3	adult	BV	SZ	70.2	63.4	1371	156	9	8.1	beef	8	small	heifer_rearing	Stable_Pen_Pasture	yes	ground	1	1	1	1	1	<25	open	1	1	0	1	1	0	0	0	0	1
83	83_1	neg	neg	4	adult	OB	SZ	70.2	63.4	1371	156	9	8.1	dairy	26	medium	heifer_rearing	Stable_Pasture	no	ground	1	1	1	1	0	<25	open	1	2	1	0	0	0	0	0	0	1
83	83_2	neg	neg	2	adult	OB	SZ	70.2	63.4	1371	156	9	8.1	dairy	26	medium	heifer_rearing	Stable_Pasture	no	ground	1	1	1	1	0	<25	open	1	2	1	0	0	0	0	0	0	1
83	83_3	neg	neg	7	adult	BV	SZ	70.2	63.4	1371	156	9	8.1	dairy	26	medium	heifer_rearing	Stable_Pasture	no	ground	1	1	1	1	0	<25	open	1	2	1	0	0	0	0	0	0	1
83	83_4	neg	neg	9	adult	BV	SZ	70.2	63.4	1371	156	9	8.1	dairy	26	medium	heifer_rearing	Stable_Pasture	no	ground	1	1	1	1	0	<25	open	1	2	1	0	0	0	0	0	0	1
83	83_5	neg	neg	5	adult	OB	SZ	70.2	63.4	1371	156	9	8.1	dairy	26	medium	heifer_rearing	Stable_Pasture	no	ground	1	1	1	1	0	<25	open	1	2	1	0	0	0	0	0	0	1
84	84_1	neg	neg	5	adult	BV	GL	17	14	1632	663	6.4	5.3	dairy	15	small	heifer_rearing+buying	Stable_Pasture	yes	public_ground	1	1	1	1	1	>50	closed	0	0	0	0	1	0	0	0	1	1
84	84_2	neg	neg	7	adult	BV	GL	17	14	1632	663	6.4	5.3	dairy	15	small	heifer_rearing+buying	Stable_Pasture	yes	public_ground	1	1	1	1	1	>50	closed	0	0	0	0	1	0	0	0	1	1
84	84_3	neg	neg	3	adult	BV	GL	17	14	1632	663	6.4	5.3	dairy	15	small	heifer_rearing+buying	Stable_Pasture	yes	public_ground	1	1	1	1	1	>50	closed	0	0	0	0	1	0	0	0	1	1
84	84_4	neg	neg	2	adult	BV	GL	17	14	1632	663	6.4	5.3	dairy	15	small	heifer_rearing+buying	Stable_Pasture	yes	public_ground	1	1	1	1	1	>50	closed	0	0	0	0	1	0	0	0	1	1
84	84_5	neg	neg	2	adult	BV	GL	17	14	1632	663	6.4	5.3	dairy	15	small	heifer_rearing+buying	Stable_Pasture	yes	public_ground	1	1	1	1	1	>50	closed	0	0	0	0	1	0	0	0	1	1
85	85_1	neg	neg	8	adult	BV	GL	28.3	22.1	1630	1272	8.7	6.8	NA	NA	NA	NA	NA	NA	NA	NA	NA	NA	NA	NA	NA	NA	NA	NA	NA	NA	NA	NA	NA	NA	NA	NA
85	85_2	neg	neg	7	adult	BV	GL	28.3	22.1	1630	1272	8.7	6.8	NA	NA	NA	NA	NA	NA	NA	NA	NA	NA	NA	NA	NA	NA	NA	NA	NA	NA	NA	NA	NA	NA	NA	NA
85	85_3	neg	neg	2	adult	BV	GL	28.3	22.1	1630	1272	8.7	6.8	NA	NA	NA	NA	NA	NA	NA	NA	NA	NA	NA	NA	NA	NA	NA	NA	NA	NA	NA	NA	NA	NA	NA	NA
85	85_4	neg	neg	7	adult	BV	GL	28.3	22.1	1630	1272	8.7	6.8	NA	NA	NA	NA	NA	NA	NA	NA	NA	NA	NA	NA	NA	NA	NA	NA	NA	NA	NA	NA	NA	NA	NA	NA
85	85_5	neg	neg	4	adult	MIX	GL	28.3	22.1	1630	1272	8.7	6.8	NA	NA	NA	NA	NA	NA	NA	NA	NA	NA	NA	NA	NA	NA	NA	NA	NA	NA	NA	NA	NA	NA	NA	NA
86	86_1	neg	neg	8	adult	BV	SG	51.5	15.9	3316	113	20.9	6.4	dairy+beef	11	small	heifer_rearing	Stable_Pasture	yes	ground	1	1	1	1	1	>50	open	1	3	0	1	1	0	0	0	1	1
86	86_2	neg	neg	6	adult	BV	SG	51.5	15.9	3316	113	20.9	6.4	dairy+beef	11	small	heifer_rearing	Stable_Pasture	yes	ground	1	1	1	1	1	>50	open	1	3	0	1	1	0	0	0	1	1
86	86_3	neg	neg	6	adult	BV	SG	51.5	15.9	3316	113	20.9	6.4	dairy+beef	11	small	heifer_rearing	Stable_Pasture	yes	ground	1	1	1	1	1	>50	open	1	3	0	1	1	0	0	0	1	1
86	86_4	neg	neg	5	adult	BV	SG	51.5	15.9	3316	113	20.9	6.4	dairy+beef	11	small	heifer_rearing	Stable_Pasture	yes	ground	1	1	1	1	1	>50	open	1	3	0	1	1	0	0	0	1	1
86	86_5	neg	neg	8	adult	BV	SG	51.5	15.9	3316	113	20.9	6.4	dairy+beef	11	small	heifer_rearing	Stable_Pasture	yes	ground	1	1	1	1	1	>50	open	1	3	0	1	1	0	0	0	1	1
87	87_1	neg	neg	4	adult	BV	SG	67.3	68.5	3315	316	7.9	8.1	NA	NA	NA	NA	NA	NA	NA	NA	NA	NA	NA	NA	NA	NA	NA	NA	NA	NA	NA	NA	NA	NA	NA	NA
87	87_2	neg	neg	4	adult	BV	SG	67.3	68.5	3315	316	7.9	8.1	NA	NA	NA	NA	NA	NA	NA	NA	NA	NA	NA	NA	NA	NA	NA	NA	NA	NA	NA	NA	NA	NA	NA	NA
87	87_3	neg	neg	3	adult	BV	SG	67.3	68.5	3315	316	7.9	8.1	NA	NA	NA	NA	NA	NA	NA	NA	NA	NA	NA	NA	NA	NA	NA	NA	NA	NA	NA	NA	NA	NA	NA	NA
87	87_4	neg	neg	4	adult	BV	SG	67.3	68.5	3315	316	7.9	8.1	NA	NA	NA	NA	NA	NA	NA	NA	NA	NA	NA	NA	NA	NA	NA	NA	NA	NA	NA	NA	NA	NA	NA	NA
87	87_5	neg	neg	5	adult	BV	SG	67.3	68.5	3315	316	7.9	8.1	NA	NA	NA	NA	NA	NA	NA	NA	NA	NA	NA	NA	NA	NA	NA	NA	NA	NA	NA	NA	NA	NA	NA	NA
88	88_1	neg	neg	3	adult	JY	SG	66.1	38.3	3379	679	13.3	7.7	NA	NA	NA	NA	NA	NA	NA	NA	NA	NA	NA	NA	NA	NA	NA	NA	NA	NA	NA	NA	NA	NA	NA	NA
88	88_2	neg	neg	6	adult	JY	SG	66.1	38.3	3379	679	13.3	7.7	NA	NA	NA	NA	NA	NA	NA	NA	NA	NA	NA	NA	NA	NA	NA	NA	NA	NA	NA	NA	NA	NA	NA	NA
88	88_3	neg	neg	7	adult	JY	SG	66.1	38.3	3379	679	13.3	7.7	NA	NA	NA	NA	NA	NA	NA	NA	NA	NA	NA	NA	NA	NA	NA	NA	NA	NA	NA	NA	NA	NA	NA	NA
88	88_4	neg	neg	4	adult	JY	SG	66.1	38.3	3379	679	13.3	7.7	NA	NA	NA	NA	NA	NA	NA	NA	NA	NA	NA	NA	NA	NA	NA	NA	NA	NA	NA	NA	NA	NA	NA	NA
88	88_5	neg	neg	3	adult	JY	SG	66.1	38.3	3379	679	13.3	7.7	NA	NA	NA	NA	NA	NA	NA	NA	NA	NA	NA	NA	NA	NA	NA	NA	NA	NA	NA	NA	NA	NA	NA	NA
89	89_1	neg	neg	4	adult	BV	SG	62.4	160.3	3360	387	4.2	10.7	NA	NA	NA	NA	NA	NA	NA	NA	NA	NA	NA	NA	NA	NA	NA	NA	NA	NA	NA	NA	NA	NA	NA	NA
89	89_2	neg	neg	6	adult	BV	SG	62.4	160.3	3360	387	4.2	10.7	NA	NA	NA	NA	NA	NA	NA	NA	NA	NA	NA	NA	NA	NA	NA	NA	NA	NA	NA	NA	NA	NA	NA	NA
89	89_3	neg	neg	4	adult	BV	SG	62.4	160.3	3360	387	4.2	10.7	NA	NA	NA	NA	NA	NA	NA	NA	NA	NA	NA	NA	NA	NA	NA	NA	NA	NA	NA	NA	NA	NA	NA	NA
89	89_4	neg	neg	2	adult	BV	SG	62.4	160.3	3360	387	4.2	10.7	NA	NA	NA	NA	NA	NA	NA	NA	NA	NA	NA	NA	NA	NA	NA	NA	NA	NA	NA	NA	NA	NA	NA	NA
89	89_5	neg	neg	6	adult	BV	SG	62.4	160.3	3360	387	4.2	10.7	NA	NA	NA	NA	NA	NA	NA	NA	NA	NA	NA	NA	NA	NA	NA	NA	NA	NA	NA	NA	NA	NA	NA	NA
90	90_1	neg	neg	8	adult	BV	SG	62.4	160.3	3360	387	4.2	10.7	dairy+beef	11	small	heifer_rearing	Stable_Pen_Pasture	yes	public	1	1	1	0	1	>50	closed	1	1	1	0	0	0	0	0	0	0
90	90_2	neg	neg	3	adult	BV	SG	62.4	160.3	3360	387	4.2	10.7	dairy+beef	11	small	heifer_rearing	Stable_Pen_Pasture	yes	public	1	1	1	0	1	>50	closed	1	1	1	0	0	0	0	0	0	0
90	90_3	neg	neg	2	adult	BV	SG	62.4	160.3	3360	387	4.2	10.7	dairy+beef	11	small	heifer_rearing	Stable_Pen_Pasture	yes	public	1	1	1	0	1	>50	closed	1	1	1	0	0	0	0	0	0	0
90	90_4	neg	neg	5	adult	BV	SG	62.4	160.3	3360	387	4.2	10.7	dairy+beef	11	small	heifer_rearing	Stable_Pen_Pasture	yes	public	1	1	1	0	1	>50	closed	1	1	1	0	0	0	0	0	0	0
90	90_5	neg	neg	6	adult	BV	SG	62.4	160.3	3360	387	4.2	10.7	dairy+beef	11	small	heifer_rearing	Stable_Pen_Pasture	yes	public	1	1	1	0	1	>50	closed	1	1	1	0	0	0	0	0	0	0
91	91_1	neg	pos	9	adult	BV	SG	35.1	53.2	3292	396	5.3	8	NA	NA	NA	NA	NA	NA	NA	NA	NA	NA	NA	NA	NA	NA	NA	NA	NA	NA	NA	NA	NA	NA	NA	NA
91	91_2	neg	pos	10	adult	BV	SG	35.1	53.2	3292	396	5.3	8	NA	NA	NA	NA	NA	NA	NA	NA	NA	NA	NA	NA	NA	NA	NA	NA	NA	NA	NA	NA	NA	NA	NA	NA
91	91_3	pos	pos	4	adult	BV	SG	35.1	53.2	3292	396	5.3	8	NA	NA	NA	NA	NA	NA	NA	NA	NA	NA	NA	NA	NA	NA	NA	NA	NA	NA	NA	NA	NA	NA	NA	NA
91	91_4	neg	pos	3	adult	OB	SG	35.1	53.2	3292	396	5.3	8	NA	NA	NA	NA	NA	NA	NA	NA	NA	NA	NA	NA	NA	NA	NA	NA	NA	NA	NA	NA	NA	NA	NA	NA
91	91_5	neg	pos	9	adult	BV	SG	35.1	53.2	3292	396	5.3	8	NA	NA	NA	NA	NA	NA	NA	NA	NA	NA	NA	NA	NA	NA	NA	NA	NA	NA	NA	NA	NA	NA	NA	NA
92	92_1	neg	neg	4	adult	OB	SG	67.1	25.1	3313	302	16.2	6.1	dairy	62	large	heifer_rearing+buying	Stable_Pasture	partly	public	1	1	1	1	1	25to50	open	1	15	0	1	0	0	0	0	0	1
92	92_2	neg	neg	5	adult	OB	SG	67.1	25.1	3313	302	16.2	6.1	dairy	62	large	heifer_rearing+buying	Stable_Pasture	partly	public	1	1	1	1	1	25to50	open	1	15	0	1	0	0	0	0	0	1
92	92_3	neg	neg	9	adult	BV	SG	67.1	25.1	3313	302	16.2	6.1	dairy	62	large	heifer_rearing+buying	Stable_Pasture	partly	public	1	1	1	1	1	25to50	open	1	15	0	1	0	0	0	0	0	1
92	92_4	neg	neg	3	adult	BV	SG	67.1	25.1	3313	302	16.2	6.1	dairy	62	large	heifer_rearing+buying	Stable_Pasture	partly	public	1	1	1	1	1	25to50	open	1	15	0	1	0	0	0	0	0	1
92	92_5	neg	neg	3	adult	BV	SG	67.1	25.1	3313	302	16.2	6.1	dairy	62	large	heifer_rearing+buying	Stable_Pasture	partly	public	1	1	1	1	1	25to50	open	1	15	0	1	0	0	0	0	0	1
93	93_1	neg	pos	6	adult	HO	SG	74.3	47	3341	496	14.8	9.3	dairy	40	large	heifer_rearing	Stable_Pasture	partly	ground	1	1	0	0	0	25to50	closed	0	0	0	0	0	0	0	0	0	0
93	93_2	neg	pos	3	adult	HO	SG	74.3	47	3341	496	14.8	9.3	dairy	40	large	heifer_rearing	Stable_Pasture	partly	ground	1	1	0	0	0	25to50	closed	0	0	0	0	0	0	0	0	0	0
93	93_3	neg	pos	3	adult	HO	SG	74.3	47	3341	496	14.8	9.3	dairy	40	large	heifer_rearing	Stable_Pasture	partly	ground	1	1	0	0	0	25to50	closed	0	0	0	0	0	0	0	0	0	0
93	93_4	pos	pos	6	adult	HO	SG	74.3	47	3341	496	14.8	9.3	dairy	40	large	heifer_rearing	Stable_Pasture	partly	ground	1	1	0	0	0	25to50	closed	0	0	0	0	0	0	0	0	0	0
93	93_5	neg	pos	3	adult	HO	SG	74.3	47	3341	496	14.8	9.3	dairy	40	large	heifer_rearing	Stable_Pasture	partly	ground	1	1	0	0	0	25to50	closed	0	0	0	0	0	0	0	0	0	0
94	94_1	neg	neg	7	adult	BV	SG	64.2	56.1	3393	184	13	11.4	NA	NA	NA	NA	NA	NA	NA	NA	NA	NA	NA	NA	NA	NA	NA	NA	NA	NA	NA	NA	NA	NA	NA	NA
94	94_2	neg	neg	7	adult	BV	SG	64.2	56.1	3393	184	13	11.4	NA	NA	NA	NA	NA	NA	NA	NA	NA	NA	NA	NA	NA	NA	NA	NA	NA	NA	NA	NA	NA	NA	NA	NA
94	94_3	neg	neg	5	adult	BV	SG	64.2	56.1	3393	184	13	11.4	NA	NA	NA	NA	NA	NA	NA	NA	NA	NA	NA	NA	NA	NA	NA	NA	NA	NA	NA	NA	NA	NA	NA	NA
94	94_4	neg	neg	5	adult	BV	SG	64.2	56.1	3393	184	13	11.4	NA	NA	NA	NA	NA	NA	NA	NA	NA	NA	NA	NA	NA	NA	NA	NA	NA	NA	NA	NA	NA	NA	NA	NA
94	94_5	neg	neg	3	adult	RH	SG	64.2	56.1	3393	184	13	11.4	NA	NA	NA	NA	NA	NA	NA	NA	NA	NA	NA	NA	NA	NA	NA	NA	NA	NA	NA	NA	NA	NA	NA	NA
95	95_1	neg	pos	2	adult	BV	SG	64.2	56.1	3393	184	13	11.4	dairy+beef	24	medium	heifer_rearing+buying	Stable_Pasture	no	ground	1	1	0	0	1	25to50	open	1	5	0	0	0	0	0	0	0	0
95	95_2	pos	pos	10	adult	BV	SG	64.2	56.1	3393	184	13	11.4	dairy+beef	24	medium	heifer_rearing+buying	Stable_Pasture	no	ground	1	1	0	0	1	25to50	open	1	5	0	0	0	0	0	0	0	0
95	95_3	neg	pos	7	adult	BV	SG	64.2	56.1	3393	184	13	11.4	dairy+beef	24	medium	heifer_rearing+buying	Stable_Pasture	no	ground	1	1	0	0	1	25to50	open	1	5	0	0	0	0	0	0	0	0
95	95_4	neg	pos	5	adult	BV	SG	64.2	56.1	3393	184	13	11.4	dairy+beef	24	medium	heifer_rearing+buying	Stable_Pasture	no	ground	1	1	0	0	1	25to50	open	1	5	0	0	0	0	0	0	0	0
95	95_5	neg	pos	5	adult	BV	SG	64.2	56.1	3393	184	13	11.4	dairy+beef	24	medium	heifer_rearing+buying	Stable_Pasture	no	ground	1	1	0	0	1	25to50	open	1	5	0	0	0	0	0	0	0	0
96	96_1	neg	neg	2	adult	BV	SG	61.4	107.3	3394	263	5.2	9.1	NA	NA	NA	NA	NA	NA	NA	NA	NA	NA	NA	NA	NA	NA	NA	NA	NA	NA	NA	NA	NA	NA	NA	NA
96	96_2	neg	neg	6	adult	BV	SG	61.4	107.3	3394	263	5.2	9.1	NA	NA	NA	NA	NA	NA	NA	NA	NA	NA	NA	NA	NA	NA	NA	NA	NA	NA	NA	NA	NA	NA	NA	NA
96	96_3	neg	neg	3	adult	BV	SG	61.4	107.3	3394	263	5.2	9.1	NA	NA	NA	NA	NA	NA	NA	NA	NA	NA	NA	NA	NA	NA	NA	NA	NA	NA	NA	NA	NA	NA	NA	NA
96	96_4	neg	neg	3	adult	JY	SG	61.4	107.3	3394	263	5.2	9.1	NA	NA	NA	NA	NA	NA	NA	NA	NA	NA	NA	NA	NA	NA	NA	NA	NA	NA	NA	NA	NA	NA	NA	NA
96	96_5	neg	neg	4	adult	JY	SG	61.4	107.3	3394	263	5.2	9.1	NA	NA	NA	NA	NA	NA	NA	NA	NA	NA	NA	NA	NA	NA	NA	NA	NA	NA	NA	NA	NA	NA	NA	NA
97	97_1	neg	neg	3	adult	RF	SG	134.1	41.1	3441	117	18.5	5.7	NA	NA	NA	NA	NA	NA	NA	NA	NA	NA	NA	NA	NA	NA	NA	NA	NA	NA	NA	NA	NA	NA	NA	NA
97	97_2	neg	neg	5	adult	RH	SG	134.1	41.1	3441	117	18.5	5.7	NA	NA	NA	NA	NA	NA	NA	NA	NA	NA	NA	NA	NA	NA	NA	NA	NA	NA	NA	NA	NA	NA	NA	NA
97	97_3	neg	neg	7	adult	RF	SG	134.1	41.1	3441	117	18.5	5.7	NA	NA	NA	NA	NA	NA	NA	NA	NA	NA	NA	NA	NA	NA	NA	NA	NA	NA	NA	NA	NA	NA	NA	NA
97	97_4	neg	neg	7	adult	RF	SG	134.1	41.1	3441	117	18.5	5.7	NA	NA	NA	NA	NA	NA	NA	NA	NA	NA	NA	NA	NA	NA	NA	NA	NA	NA	NA	NA	NA	NA	NA	NA
97	97_5	neg	neg	7	adult	RF	SG	134.1	41.1	3441	117	18.5	5.7	NA	NA	NA	NA	NA	NA	NA	NA	NA	NA	NA	NA	NA	NA	NA	NA	NA	NA	NA	NA	NA	NA	NA	NA
98	98_1	neg	neg	5	adult	BV	AR	66.2	51.2	3036	115	16.8	13	dairy	40	large	heifer_rearing	Stable_Pen_Pasture	partly	ground	1	1	0	0	1	>50	closed	1	2	0	0	0	0	0	0	0	1
98	98_2	neg	neg	3	adult	BV	AR	66.2	51.2	3036	115	16.8	13	dairy	40	large	heifer_rearing	Stable_Pen_Pasture	partly	ground	1	1	0	0	1	>50	closed	1	2	0	0	0	0	0	0	0	1
98	98_3	neg	neg	1	1y	BV	AR	66.2	51.2	3036	115	16.8	13	dairy	40	large	heifer_rearing	Stable_Pen_Pasture	partly	ground	1	1	0	0	1	>50	closed	1	2	0	0	0	0	0	0	0	1
98	98_4	neg	neg	5	adult	BV	AR	66.2	51.2	3036	115	16.8	13	dairy	40	large	heifer_rearing	Stable_Pen_Pasture	partly	ground	1	1	0	0	1	>50	closed	1	2	0	0	0	0	0	0	0	1
98	98_5	neg	neg	2	adult	BV	AR	66.2	51.2	3036	115	16.8	13	dairy	40	large	heifer_rearing	Stable_Pen_Pasture	partly	ground	1	1	0	0	1	>50	closed	1	2	0	0	0	0	0	0	0	1
99	99_1	neg	neg	5	adult	BV	AR	64.2	10.3	3001	924	36.7	5.9	NA	NA	NA	NA	NA	NA	NA	NA	NA	NA	NA	NA	NA	NA	NA	NA	NA	NA	NA	NA	NA	NA	NA	NA
99	99_2	neg	neg	5	adult	BV	AR	64.2	10.3	3001	924	36.7	5.9	NA	NA	NA	NA	NA	NA	NA	NA	NA	NA	NA	NA	NA	NA	NA	NA	NA	NA	NA	NA	NA	NA	NA	NA
99	99_3	neg	neg	10	adult	BV	AR	64.2	10.3	3001	924	36.7	5.9	NA	NA	NA	NA	NA	NA	NA	NA	NA	NA	NA	NA	NA	NA	NA	NA	NA	NA	NA	NA	NA	NA	NA	NA
99	99_4	neg	neg	4	adult	BV	AR	64.2	10.3	3001	924	36.7	5.9	NA	NA	NA	NA	NA	NA	NA	NA	NA	NA	NA	NA	NA	NA	NA	NA	NA	NA	NA	NA	NA	NA	NA	NA
99	99_5	neg	neg	5	adult	BV	AR	64.2	10.3	3001	924	36.7	5.9	NA	NA	NA	NA	NA	NA	NA	NA	NA	NA	NA	NA	NA	NA	NA	NA	NA	NA	NA	NA	NA	NA	NA	NA
100	100_1	neg	neg	7	adult	BV	SG	51.8	30.6	3275	432	14.2	8.4	NA	NA	NA	NA	NA	NA	NA	NA	NA	NA	NA	NA	NA	NA	NA	NA	NA	NA	NA	NA	NA	NA	NA	NA
100	100_2	neg	neg	7	adult	BV	SG	51.8	30.6	3275	432	14.2	8.4	NA	NA	NA	NA	NA	NA	NA	NA	NA	NA	NA	NA	NA	NA	NA	NA	NA	NA	NA	NA	NA	NA	NA	NA
100	100_3	neg	neg	6	adult	BV	SG	51.8	30.6	3275	432	14.2	8.4	NA	NA	NA	NA	NA	NA	NA	NA	NA	NA	NA	NA	NA	NA	NA	NA	NA	NA	NA	NA	NA	NA	NA	NA
100	100_4	neg	neg	8	adult	BV	SG	51.8	30.6	3275	432	14.2	8.4	NA	NA	NA	NA	NA	NA	NA	NA	NA	NA	NA	NA	NA	NA	NA	NA	NA	NA	NA	NA	NA	NA	NA	NA
100	100_5	neg	neg	4	adult	BV	SG	51.8	30.6	3275	432	14.2	8.4	NA	NA	NA	NA	NA	NA	NA	NA	NA	NA	NA	NA	NA	NA	NA	NA	NA	NA	NA	NA	NA	NA	NA	NA
101	101_1	neg	neg	5	adult	HL	SG	48.1	18.4	3256	192	20.6	7.9	NA	NA	NA	NA	NA	NA	NA	NA	NA	NA	NA	NA	NA	NA	NA	NA	NA	NA	NA	NA	NA	NA	NA	NA
101	101_2	neg	neg	0	< 1y	HL	SG	48.1	18.4	3256	192	20.6	7.9	NA	NA	NA	NA	NA	NA	NA	NA	NA	NA	NA	NA	NA	NA	NA	NA	NA	NA	NA	NA	NA	NA	NA	NA
101	101_3	neg	neg	5	adult	HL	SG	48.1	18.4	3256	192	20.6	7.9	NA	NA	NA	NA	NA	NA	NA	NA	NA	NA	NA	NA	NA	NA	NA	NA	NA	NA	NA	NA	NA	NA	NA	NA
102	102_1	neg	neg	5	adult	BV	AI	107.9	31.4	3101	280	16.6	4.8	dairy	50	large	buying	Stable_Pasture	no	ground	1	1	1	0	1	<25	closed	0	0	0	1	1	0	0	0	0	1
102	102_2	neg	neg	2	adult	BV	AI	107.9	31.4	3101	280	16.6	4.8	dairy	50	large	buying	Stable_Pasture	no	ground	1	1	1	0	1	<25	closed	0	0	0	1	1	0	0	0	0	1
102	102_3	neg	neg	5	adult	BV	AI	107.9	31.4	3101	280	16.6	4.8	dairy	50	large	buying	Stable_Pasture	no	ground	1	1	1	0	1	<25	closed	0	0	0	1	1	0	0	0	0	1
102	102_4	neg	neg	8	adult	BV	AI	107.9	31.4	3101	280	16.6	4.8	dairy	50	large	buying	Stable_Pasture	no	ground	1	1	1	0	1	<25	closed	0	0	0	1	1	0	0	0	0	1
102	102_5	neg	neg	4	adult	BV	AI	107.9	31.4	3101	280	16.6	4.8	dairy	50	large	buying	Stable_Pasture	no	ground	1	1	1	0	1	<25	closed	0	0	0	1	1	0	0	0	0	1
103	103_1	neg	neg	10	adult	BV	AI	100.7	172.7	3102	129	5.2	8.9	NA	NA	NA	NA	NA	NA	NA	NA	NA	NA	NA	NA	NA	NA	NA	NA	NA	NA	NA	NA	NA	NA	NA	NA
103	103_2	neg	neg	11	adult	BV	AI	100.7	172.7	3102	129	5.2	8.9	NA	NA	NA	NA	NA	NA	NA	NA	NA	NA	NA	NA	NA	NA	NA	NA	NA	NA	NA	NA	NA	NA	NA	NA
103	103_3	neg	neg	3	adult	BV	AI	100.7	172.7	3102	129	5.2	8.9	NA	NA	NA	NA	NA	NA	NA	NA	NA	NA	NA	NA	NA	NA	NA	NA	NA	NA	NA	NA	NA	NA	NA	NA
103	103_4	neg	neg	3	adult	BV	AI	100.7	172.7	3102	129	5.2	8.9	NA	NA	NA	NA	NA	NA	NA	NA	NA	NA	NA	NA	NA	NA	NA	NA	NA	NA	NA	NA	NA	NA	NA	NA
103	103_5	neg	neg	4	adult	BV	AI	100.7	172.7	3102	129	5.2	8.9	NA	NA	NA	NA	NA	NA	NA	NA	NA	NA	NA	NA	NA	NA	NA	NA	NA	NA	NA	NA	NA	NA	NA	NA
104	104_1	neg	pos	4	adult	SI	VS	2.8	4	6007	509	3.5	4.9	dairy	15	small	heifer_rearing+buying	Stable_Pen_Pasture	yes	public	1	1	0	0	1	25to50	closed	1	1	0	1	1	1	0	0	1	1
104	104_2	neg	pos	4	adult	SI	VS	2.8	4	6007	509	3.5	4.9	dairy	15	small	heifer_rearing+buying	Stable_Pen_Pasture	yes	public	1	1	0	0	1	25to50	closed	1	1	0	1	1	1	0	0	1	1
104	104_3	pos	pos	4	adult	SI	VS	2.8	4	6007	509	3.5	4.9	dairy	15	small	heifer_rearing+buying	Stable_Pen_Pasture	yes	public	1	1	0	0	1	25to50	closed	1	1	0	1	1	1	0	0	1	1
104	104_4	neg	pos	6	adult	SI	VS	2.8	4	6007	509	3.5	4.9	dairy	15	small	heifer_rearing+buying	Stable_Pen_Pasture	yes	public	1	1	0	0	1	25to50	closed	1	1	0	1	1	1	0	0	1	1
104	104_5	neg	pos	4	adult	GV	VS	2.8	4	6007	509	3.5	4.9	dairy	15	small	heifer_rearing+buying	Stable_Pen_Pasture	yes	public	1	1	0	0	1	25to50	closed	1	1	0	1	1	1	0	0	1	1
105	105_1	neg	pos	4	adult	EV	VS	4.7	12.5	6294	19	1.3	3.5	NA	NA	NA	NA	NA	NA	NA	NA	NA	NA	NA	NA	NA	NA	NA	NA	NA	NA	NA	NA	NA	NA	NA	NA
105	105_2	neg	pos	5	adult	EV	VS	4.7	12.5	6294	19	1.3	3.5	NA	NA	NA	NA	NA	NA	NA	NA	NA	NA	NA	NA	NA	NA	NA	NA	NA	NA	NA	NA	NA	NA	NA	NA
105	105_3	neg	pos	8	adult	EV	VS	4.7	12.5	6294	19	1.3	3.5	NA	NA	NA	NA	NA	NA	NA	NA	NA	NA	NA	NA	NA	NA	NA	NA	NA	NA	NA	NA	NA	NA	NA	NA
105	105_4	neg	pos	6	adult	HIN	VS	4.7	12.5	6294	19	1.3	3.5	NA	NA	NA	NA	NA	NA	NA	NA	NA	NA	NA	NA	NA	NA	NA	NA	NA	NA	NA	NA	NA	NA	NA	NA
105	105_5	pos	pos	4	adult	SF	VS	4.7	12.5	6294	19	1.3	3.5	NA	NA	NA	NA	NA	NA	NA	NA	NA	NA	NA	NA	NA	NA	NA	NA	NA	NA	NA	NA	NA	NA	NA	NA
106	106_1	neg	neg	3	adult	SF	BE	39.8	95.8	794	264	3.6	8.7	dairy+beef	23	medium	heifer_rearing	Stable_Pasture	yes	public	1	1	1	0	1	>50	closed	0	0	0	0	0	0	0	0	0	1
106	106_2	neg	neg	7	adult	SF	BE	39.8	95.8	794	264	3.6	8.7	dairy+beef	23	medium	heifer_rearing	Stable_Pasture	yes	public	1	1	1	0	1	>50	closed	0	0	0	0	0	0	0	0	0	1
106	106_3	neg	neg	3	adult	SF	BE	39.8	95.8	794	264	3.6	8.7	dairy+beef	23	medium	heifer_rearing	Stable_Pasture	yes	public	1	1	1	0	1	>50	closed	0	0	0	0	0	0	0	0	0	1
106	106_4	neg	neg	8	adult	SF	BE	39.8	95.8	794	264	3.6	8.7	dairy+beef	23	medium	heifer_rearing	Stable_Pasture	yes	public	1	1	1	0	1	>50	closed	0	0	0	0	0	0	0	0	0	1
106	106_5	neg	neg	3	adult	SF	BE	39.8	95.8	794	264	3.6	8.7	dairy+beef	23	medium	heifer_rearing	Stable_Pasture	yes	public	1	1	1	0	1	>50	closed	0	0	0	0	0	0	0	0	0	1
107	107_1	neg	neg	4	adult	RH	BE	47	58.4	726	327	12.8	15.9	NA	NA	NA	NA	NA	NA	NA	NA	NA	NA	NA	NA	NA	NA	NA	NA	NA	NA	NA	NA	NA	NA	NA	NA
107	107_2	neg	neg	4	adult	HO	BE	47	58.4	726	327	12.8	15.9	NA	NA	NA	NA	NA	NA	NA	NA	NA	NA	NA	NA	NA	NA	NA	NA	NA	NA	NA	NA	NA	NA	NA	NA
107	107_3	neg	neg	4	adult	HO	BE	47	58.4	726	327	12.8	15.9	NA	NA	NA	NA	NA	NA	NA	NA	NA	NA	NA	NA	NA	NA	NA	NA	NA	NA	NA	NA	NA	NA	NA	NA
107	107_4	neg	neg	9	adult	RF	BE	47	58.4	726	327	12.8	15.9	NA	NA	NA	NA	NA	NA	NA	NA	NA	NA	NA	NA	NA	NA	NA	NA	NA	NA	NA	NA	NA	NA	NA	NA
107	107_5	neg	neg	3	adult	RF	BE	47	58.4	726	327	12.8	15.9	NA	NA	NA	NA	NA	NA	NA	NA	NA	NA	NA	NA	NA	NA	NA	NA	NA	NA	NA	NA	NA	NA	NA	NA
108	108_1	neg	neg	6	adult	RH	BE	47.8	38.7	304	229	12.7	10.3	dairy	80	large	heifer_rearing	Stable_Pasture	partly	public	1	1	1	1	1	<25	closed	1	10	0	1	0	0	0	0	0	0
108	108_2	neg	neg	5	adult	RH	BE	47.8	38.7	304	229	12.7	10.3	dairy	80	large	heifer_rearing	Stable_Pasture	partly	public	1	1	1	1	1	<25	closed	1	10	0	1	0	0	0	0	0	0
108	108_3	neg	neg	3	adult	HO	BE	47.8	38.7	304	229	12.7	10.3	dairy	80	large	heifer_rearing	Stable_Pasture	partly	public	1	1	1	1	1	<25	closed	1	10	0	1	0	0	0	0	0	0
108	108_4	neg	neg	9	adult	HO	BE	47.8	38.7	304	229	12.7	10.3	dairy	80	large	heifer_rearing	Stable_Pasture	partly	public	1	1	1	1	1	<25	closed	1	10	0	1	0	0	0	0	0	0
109	109_1	neg	neg	6	adult	HO	BE	86.3	209.3	901	340	5.6	13.7	dairy+beef	14	small	heifer_rearing	Stable_Pasture	no	public	1	1	1	1	1	25to50	open	0	0	0	1	1	1	0	0	0	1
109	109_2	neg	neg	4	adult	HO	BE	86.3	209.3	901	340	5.6	13.7	dairy+beef	14	small	heifer_rearing	Stable_Pasture	no	public	1	1	1	1	1	25to50	open	0	0	0	1	1	1	0	0	0	1
109	109_3	neg	neg	8	adult	RF	BE	86.3	209.3	901	340	5.6	13.7	dairy+beef	14	small	heifer_rearing	Stable_Pasture	no	public	1	1	1	1	1	25to50	open	0	0	0	1	1	1	0	0	0	1
109	109_4	neg	neg	4	adult	HO	BE	86.3	209.3	901	340	5.6	13.7	dairy+beef	14	small	heifer_rearing	Stable_Pasture	no	public	1	1	1	1	1	25to50	open	0	0	0	1	1	1	0	0	0	1
109	109_5	neg	neg	2	adult	RF	BE	86.3	209.3	901	340	5.6	13.7	dairy+beef	14	small	heifer_rearing	Stable_Pasture	no	public	1	1	1	1	1	25to50	open	0	0	0	1	1	1	0	0	0	1
110	110_1	neg	neg	6	adult	BV	BE	86.3	209.3	901	340	5.6	13.7	NA	NA	NA	NA	NA	NA	NA	NA	NA	NA	NA	NA	NA	NA	NA	NA	NA	NA	NA	NA	NA	NA	NA	NA
110	110_2	neg	neg	2	adult	BV	BE	86.3	209.3	901	340	5.6	13.7	NA	NA	NA	NA	NA	NA	NA	NA	NA	NA	NA	NA	NA	NA	NA	NA	NA	NA	NA	NA	NA	NA	NA	NA
110	110_3	neg	neg	2	adult	BV	BE	86.3	209.3	901	340	5.6	13.7	NA	NA	NA	NA	NA	NA	NA	NA	NA	NA	NA	NA	NA	NA	NA	NA	NA	NA	NA	NA	NA	NA	NA	NA
110	110_4	neg	neg	4	adult	BV	BE	86.3	209.3	901	340	5.6	13.7	NA	NA	NA	NA	NA	NA	NA	NA	NA	NA	NA	NA	NA	NA	NA	NA	NA	NA	NA	NA	NA	NA	NA	NA
110	110_5	neg	neg	3	adult	BV	BE	86.3	209.3	901	340	5.6	13.7	NA	NA	NA	NA	NA	NA	NA	NA	NA	NA	NA	NA	NA	NA	NA	NA	NA	NA	NA	NA	NA	NA	NA	NA
111	111_1	neg	neg	3	adult	SF	VD	13.3	14.8	5405	169	11.1	12.3	NA	NA	NA	NA	NA	NA	NA	NA	NA	NA	NA	NA	NA	NA	NA	NA	NA	NA	NA	NA	NA	NA	NA	NA
111	111_2	neg	neg	NA	adult	NA	VD	13.3	14.8	5405	169	11.1	12.3	NA	NA	NA	NA	NA	NA	NA	NA	NA	NA	NA	NA	NA	NA	NA	NA	NA	NA	NA	NA	NA	NA	NA	NA
111	111_3	neg	neg	NA	adult	NA	VD	13.3	14.8	5405	169	11.1	12.3	NA	NA	NA	NA	NA	NA	NA	NA	NA	NA	NA	NA	NA	NA	NA	NA	NA	NA	NA	NA	NA	NA	NA	NA
111	111_4	neg	neg	NA	adult	NA	VD	13.3	14.8	5405	169	11.1	12.3	NA	NA	NA	NA	NA	NA	NA	NA	NA	NA	NA	NA	NA	NA	NA	NA	NA	NA	NA	NA	NA	NA	NA	NA
111	111_5	neg	neg	NA	adult	NA	VD	13.3	14.8	5405	169	11.1	12.3	NA	NA	NA	NA	NA	NA	NA	NA	NA	NA	NA	NA	NA	NA	NA	NA	NA	NA	NA	NA	NA	NA	NA	NA
112	112_1	neg	pos	4	adult	RH	SO	46.2	9.2	2501	120	30.5	6.1	NA	NA	NA	NA	NA	NA	NA	NA	NA	NA	NA	NA	NA	NA	NA	NA	NA	NA	NA	NA	NA	NA	NA	NA
112	112_2	neg	pos	13	adult	RF	SO	46.2	9.2	2501	120	30.5	6.1	NA	NA	NA	NA	NA	NA	NA	NA	NA	NA	NA	NA	NA	NA	NA	NA	NA	NA	NA	NA	NA	NA	NA	NA
112	112_3	neg	pos	10	adult	RF	SO	46.2	9.2	2501	120	30.5	6.1	NA	NA	NA	NA	NA	NA	NA	NA	NA	NA	NA	NA	NA	NA	NA	NA	NA	NA	NA	NA	NA	NA	NA	NA
112	112_4	neg	pos	5	adult	RH	SO	46.2	9.2	2501	120	30.5	6.1	NA	NA	NA	NA	NA	NA	NA	NA	NA	NA	NA	NA	NA	NA	NA	NA	NA	NA	NA	NA	NA	NA	NA	NA
112	112_5	pos	pos	9	adult	RF	SO	46.2	9.2	2501	120	30.5	6.1	NA	NA	NA	NA	NA	NA	NA	NA	NA	NA	NA	NA	NA	NA	NA	NA	NA	NA	NA	NA	NA	NA	NA	NA
113	113_1	neg	pos	3	adult	RH	SO	7.2	0.3	2601	687	109.4	4.1	dairy	30	medium	heifer_rearing+buying	Stable_Pen	NA	ground	1	1	1	1	1	25to50	closed	1	2.5	0	1	1	1	0	0	1	1
113	113_2	pos	pos	3	adult	BV	SO	7.2	0.3	2601	687	109.4	4.1	dairy	30	medium	heifer_rearing+buying	Stable_Pen	NA	ground	1	1	1	1	1	25to50	closed	1	2.5	0	1	1	1	0	0	1	1
113	113_3	neg	pos	4	adult	RH	SO	7.2	0.3	2601	687	109.4	4.1	dairy	30	medium	heifer_rearing+buying	Stable_Pen	NA	ground	1	1	1	1	1	25to50	closed	1	2.5	0	1	1	1	0	0	1	1
113	113_4	neg	pos	7	adult	JY	SO	7.2	0.3	2601	687	109.4	4.1	dairy	30	medium	heifer_rearing+buying	Stable_Pen	NA	ground	1	1	1	1	1	25to50	closed	1	2.5	0	1	1	1	0	0	1	1
113	113_5	neg	pos	2	adult	JY	SO	7.2	0.3	2601	687	109.4	4.1	dairy	30	medium	heifer_rearing+buying	Stable_Pen	NA	ground	1	1	1	1	1	25to50	closed	1	2.5	0	1	1	1	0	0	1	1
114	114_1	neg	neg	2	adult	NA	BE	73	78.7	988	251	14.9	16.1	NA	NA	NA	NA	NA	NA	NA	NA	NA	NA	NA	NA	NA	NA	NA	NA	NA	NA	NA	NA	NA	NA	NA	NA
114	114_2	neg	neg	2	adult	SF	BE	73	78.7	988	251	14.9	16.1	NA	NA	NA	NA	NA	NA	NA	NA	NA	NA	NA	NA	NA	NA	NA	NA	NA	NA	NA	NA	NA	NA	NA	NA
114	114_3	neg	neg	6	adult	SI	BE	73	78.7	988	251	14.9	16.1	NA	NA	NA	NA	NA	NA	NA	NA	NA	NA	NA	NA	NA	NA	NA	NA	NA	NA	NA	NA	NA	NA	NA	NA
114	114_4	neg	neg	13	adult	SF	BE	73	78.7	988	251	14.9	16.1	NA	NA	NA	NA	NA	NA	NA	NA	NA	NA	NA	NA	NA	NA	NA	NA	NA	NA	NA	NA	NA	NA	NA	NA
115	115_1	neg	neg	5	adult	SI	BE	110.1	91.9	953	173	15.3	12.7	beef	13	small	buying	Stable_Pen_Pasture	no	ground	1	1	1	0	0	>50	closed	1	2	0	0	0	0	0	0	0	1
115	115_2	neg	neg	5	adult	SI	BE	110.1	91.9	953	173	15.3	12.7	beef	13	small	buying	Stable_Pen_Pasture	no	ground	1	1	1	0	0	>50	closed	1	2	0	0	0	0	0	0	0	1
115	115_3	neg	neg	5	adult	SI	BE	110.1	91.9	953	173	15.3	12.7	beef	13	small	buying	Stable_Pen_Pasture	no	ground	1	1	1	0	0	>50	closed	1	2	0	0	0	0	0	0	0	1
115	115_4	neg	neg	10	adult	SI	BE	110.1	91.9	953	173	15.3	12.7	beef	13	small	buying	Stable_Pen_Pasture	no	ground	1	1	1	0	0	>50	closed	1	2	0	0	0	0	0	0	0	1
115	115_5	neg	neg	6	adult	SI	BE	110.1	91.9	953	173	15.3	12.7	beef	13	small	buying	Stable_Pen_Pasture	no	ground	1	1	1	0	0	>50	closed	1	2	0	0	0	0	0	0	0	1
116	116_1	neg	neg	4	adult	NO	FR	64.7	85.4	2149	201	8.4	11	dairy	33	large	heifer_rearing	Stable_Pen_Pasture	yes	public_ground	1	1	0	0	1	>50	closed	1	3	1	0	0	0	0	0	1	1
116	116_2	neg	neg	3	adult	NO	FR	64.7	85.4	2149	201	8.4	11	dairy	33	large	heifer_rearing	Stable_Pen_Pasture	yes	public_ground	1	1	0	0	1	>50	closed	1	3	1	0	0	0	0	0	1	1
116	116_3	neg	neg	3	adult	NO	FR	64.7	85.4	2149	201	8.4	11	dairy	33	large	heifer_rearing	Stable_Pen_Pasture	yes	public_ground	1	1	0	0	1	>50	closed	1	3	1	0	0	0	0	0	1	1
116	116_4	neg	neg	3	adult	NO	FR	64.7	85.4	2149	201	8.4	11	dairy	33	large	heifer_rearing	Stable_Pen_Pasture	yes	public_ground	1	1	0	0	1	>50	closed	1	3	1	0	0	0	0	0	1	1
116	116_5	neg	neg	6	adult	NO	FR	64.7	85.4	2149	201	8.4	11	dairy	33	large	heifer_rearing	Stable_Pen_Pasture	yes	public_ground	1	1	0	0	1	>50	closed	1	3	1	0	0	0	0	0	1	1
117	117_1	neg	neg	6	adult	MIX	VD	63.7	67.5	5803	60	9	9.6	NA	NA	NA	NA	NA	NA	NA	NA	NA	NA	NA	NA	NA	NA	NA	NA	NA	NA	NA	NA	NA	NA	NA	NA
117	117_2	neg	neg	5	adult	MIX	VD	63.7	67.5	5803	60	9	9.6	NA	NA	NA	NA	NA	NA	NA	NA	NA	NA	NA	NA	NA	NA	NA	NA	NA	NA	NA	NA	NA	NA	NA	NA
117	117_3	neg	neg	5	adult	MB	VD	63.7	67.5	5803	60	9	9.6	NA	NA	NA	NA	NA	NA	NA	NA	NA	NA	NA	NA	NA	NA	NA	NA	NA	NA	NA	NA	NA	NA	NA	NA
117	117_4	neg	neg	6	adult	MIX	VD	63.7	67.5	5803	60	9	9.6	NA	NA	NA	NA	NA	NA	NA	NA	NA	NA	NA	NA	NA	NA	NA	NA	NA	NA	NA	NA	NA	NA	NA	NA
117	117_5	neg	neg	7	adult	MIX	VD	63.7	67.5	5803	60	9	9.6	NA	NA	NA	NA	NA	NA	NA	NA	NA	NA	NA	NA	NA	NA	NA	NA	NA	NA	NA	NA	NA	NA	NA	NA
118	118_1	neg	neg	6	adult	HO	BE	58.9	51.7	668	313	11.9	10.4	dairy	40	large	heifer_rearing	Stable_Pen	yes	public_ground	1	1	0	0	1	25to50	closed	1	4	0	0	0	0	0	0	0	1
118	118_2	neg	neg	3	adult	HO	BE	58.9	51.7	668	313	11.9	10.4	dairy	40	large	heifer_rearing	Stable_Pen	yes	public_ground	1	1	0	0	1	25to50	closed	1	4	0	0	0	0	0	0	0	1
118	118_3	neg	neg	6	adult	HO	BE	58.9	51.7	668	313	11.9	10.4	dairy	40	large	heifer_rearing	Stable_Pen	yes	public_ground	1	1	0	0	1	25to50	closed	1	4	0	0	0	0	0	0	0	1
118	118_4	neg	neg	2	adult	HO	BE	58.9	51.7	668	313	11.9	10.4	dairy	40	large	heifer_rearing	Stable_Pen	yes	public_ground	1	1	0	0	1	25to50	closed	1	4	0	0	0	0	0	0	0	1
118	118_5	neg	neg	3	adult	HO	BE	58.9	51.7	668	313	11.9	10.4	dairy	40	large	heifer_rearing	Stable_Pen	yes	public_ground	1	1	0	0	1	25to50	closed	1	4	0	0	0	0	0	0	0	1
119	119_1	neg	pos	5	adult	RH	BE	87	15.2	944	447	44	7.7	NA	NA	NA	NA	NA	NA	NA	NA	NA	NA	NA	NA	NA	NA	NA	NA	NA	NA	NA	NA	NA	NA	NA	NA
119	119_2	neg	pos	7	adult	RH	BE	87	15.2	944	447	44	7.7	NA	NA	NA	NA	NA	NA	NA	NA	NA	NA	NA	NA	NA	NA	NA	NA	NA	NA	NA	NA	NA	NA	NA	NA
119	119_3	pos	pos	14	adult	RH	BE	87	15.2	944	447	44	7.7	NA	NA	NA	NA	NA	NA	NA	NA	NA	NA	NA	NA	NA	NA	NA	NA	NA	NA	NA	NA	NA	NA	NA	NA
119	119_4	neg	pos	3	adult	RH	BE	87	15.2	944	447	44	7.7	NA	NA	NA	NA	NA	NA	NA	NA	NA	NA	NA	NA	NA	NA	NA	NA	NA	NA	NA	NA	NA	NA	NA	NA
119	119_5	neg	pos	9	adult	RH	BE	87	15.2	944	447	44	7.7	NA	NA	NA	NA	NA	NA	NA	NA	NA	NA	NA	NA	NA	NA	NA	NA	NA	NA	NA	NA	NA	NA	NA	NA
120	120_1	neg	neg	3	adult	SF	VD	147.8	115.7	2086	55	12.8	10	NA	NA	NA	NA	NA	NA	NA	NA	NA	NA	NA	NA	NA	NA	NA	NA	NA	NA	NA	NA	NA	NA	NA	NA
120	120_2	neg	neg	2	adult	SF	VD	147.8	115.7	2086	55	12.8	10	NA	NA	NA	NA	NA	NA	NA	NA	NA	NA	NA	NA	NA	NA	NA	NA	NA	NA	NA	NA	NA	NA	NA	NA
120	120_3	neg	neg	3	adult	SF	VD	147.8	115.7	2086	55	12.8	10	NA	NA	NA	NA	NA	NA	NA	NA	NA	NA	NA	NA	NA	NA	NA	NA	NA	NA	NA	NA	NA	NA	NA	NA
120	120_4	neg	neg	13	adult	RF	VD	147.8	115.7	2086	55	12.8	10	NA	NA	NA	NA	NA	NA	NA	NA	NA	NA	NA	NA	NA	NA	NA	NA	NA	NA	NA	NA	NA	NA	NA	NA
120	120_5	neg	neg	7	adult	RF	VD	147.8	115.7	2086	55	12.8	10	NA	NA	NA	NA	NA	NA	NA	NA	NA	NA	NA	NA	NA	NA	NA	NA	NA	NA	NA	NA	NA	NA	NA	NA
121	121_1	neg	neg	10	adult	BV	VD	17.3	1.9	5587	740	75.5	8.1	NA	NA	NA	NA	NA	NA	NA	NA	NA	NA	NA	NA	NA	NA	NA	NA	NA	NA	NA	NA	NA	NA	NA	NA
121	121_2	neg	neg	5	adult	BV	VD	17.3	1.9	5587	740	75.5	8.1	NA	NA	NA	NA	NA	NA	NA	NA	NA	NA	NA	NA	NA	NA	NA	NA	NA	NA	NA	NA	NA	NA	NA	NA
121	121_3	neg	neg	5	adult	BV	VD	17.3	1.9	5587	740	75.5	8.1	NA	NA	NA	NA	NA	NA	NA	NA	NA	NA	NA	NA	NA	NA	NA	NA	NA	NA	NA	NA	NA	NA	NA	NA
121	121_4	neg	neg	5	adult	BV	VD	17.3	1.9	5587	740	75.5	8.1	NA	NA	NA	NA	NA	NA	NA	NA	NA	NA	NA	NA	NA	NA	NA	NA	NA	NA	NA	NA	NA	NA	NA	NA
121	121_5	neg	neg	6	adult	BV	VD	17.3	1.9	5587	740	75.5	8.1	NA	NA	NA	NA	NA	NA	NA	NA	NA	NA	NA	NA	NA	NA	NA	NA	NA	NA	NA	NA	NA	NA	NA	NA
122	122_1	neg	neg	3	adult	LM	GE	0	0	6624	63	19.1	13.3	NA	NA	NA	NA	NA	NA	NA	NA	NA	NA	NA	NA	NA	NA	NA	NA	NA	NA	NA	NA	NA	NA	NA	NA
122	122_2	neg	neg	3	adult	LM	GE	0	0	6624	63	19.1	13.3	NA	NA	NA	NA	NA	NA	NA	NA	NA	NA	NA	NA	NA	NA	NA	NA	NA	NA	NA	NA	NA	NA	NA	NA
122	122_3	neg	neg	3	adult	LM	GE	0	0	6624	63	19.1	13.3	NA	NA	NA	NA	NA	NA	NA	NA	NA	NA	NA	NA	NA	NA	NA	NA	NA	NA	NA	NA	NA	NA	NA	NA
122	122_4	neg	neg	5	adult	LM	GE	0	0	6624	63	19.1	13.3	NA	NA	NA	NA	NA	NA	NA	NA	NA	NA	NA	NA	NA	NA	NA	NA	NA	NA	NA	NA	NA	NA	NA	NA
123	123_1	neg	neg	5	adult	SF	FR	89.8	48	2011	182	18.4	9.9	NA	NA	NA	NA	NA	NA	NA	NA	NA	NA	NA	NA	NA	NA	NA	NA	NA	NA	NA	NA	NA	NA	NA	NA
123	123_2	neg	neg	5	adult	SI	FR	89.8	48	2011	182	18.4	9.9	NA	NA	NA	NA	NA	NA	NA	NA	NA	NA	NA	NA	NA	NA	NA	NA	NA	NA	NA	NA	NA	NA	NA	NA
123	123_3	neg	neg	6	adult	RF	FR	89.8	48	2011	182	18.4	9.9	NA	NA	NA	NA	NA	NA	NA	NA	NA	NA	NA	NA	NA	NA	NA	NA	NA	NA	NA	NA	NA	NA	NA	NA
123	123_4	neg	neg	8	adult	RF	FR	89.8	48	2011	182	18.4	9.9	NA	NA	NA	NA	NA	NA	NA	NA	NA	NA	NA	NA	NA	NA	NA	NA	NA	NA	NA	NA	NA	NA	NA	NA
123	123_5	neg	neg	4	adult	SI	FR	89.8	48	2011	182	18.4	9.9	NA	NA	NA	NA	NA	NA	NA	NA	NA	NA	NA	NA	NA	NA	NA	NA	NA	NA	NA	NA	NA	NA	NA	NA
124	124_1	neg	neg	3	adult	HO	VD	70	60.2	5766	84	16.6	14.3	dairy	45	large	heifer_rearing	Stable_Pen_Pasture	no	public	1	1	0	0	1	>50	closed	1	5	1	0	1	0	0	0	0	1
124	124_2	neg	neg	3	adult	BV	VD	70	60.2	5766	84	16.6	14.3	dairy	45	large	heifer_rearing	Stable_Pen_Pasture	no	public	1	1	0	0	1	>50	closed	1	5	1	0	1	0	0	0	0	1
124	124_3	neg	neg	3	adult	HO	VD	70	60.2	5766	84	16.6	14.3	dairy	45	large	heifer_rearing	Stable_Pen_Pasture	no	public	1	1	0	0	1	>50	closed	1	5	1	0	1	0	0	0	0	1
124	124_4	neg	neg	3	adult	HO	VD	70	60.2	5766	84	16.6	14.3	dairy	45	large	heifer_rearing	Stable_Pen_Pasture	no	public	1	1	0	0	1	>50	closed	1	5	1	0	1	0	0	0	0	1
124	124_5	neg	neg	5	adult	HO	VD	70	60.2	5766	84	16.6	14.3	dairy	45	large	heifer_rearing	Stable_Pen_Pasture	no	public	1	1	0	0	1	>50	closed	1	5	1	0	1	0	0	0	0	1
125	125_1	neg	neg	6	adult	MB	VD	68.8	193.1	5759	29	4.7	13.3	NA	NA	NA	NA	NA	NA	NA	NA	NA	NA	NA	NA	NA	NA	NA	NA	NA	NA	NA	NA	NA	NA	NA	NA
125	125_2	neg	neg	11	adult	MB	VD	68.8	193.1	5759	29	4.7	13.3	NA	NA	NA	NA	NA	NA	NA	NA	NA	NA	NA	NA	NA	NA	NA	NA	NA	NA	NA	NA	NA	NA	NA	NA
125	125_3	neg	neg	3	adult	MB	VD	68.8	193.1	5759	29	4.7	13.3	NA	NA	NA	NA	NA	NA	NA	NA	NA	NA	NA	NA	NA	NA	NA	NA	NA	NA	NA	NA	NA	NA	NA	NA
125	125_4	neg	neg	2	adult	MB	VD	68.8	193.1	5759	29	4.7	13.3	NA	NA	NA	NA	NA	NA	NA	NA	NA	NA	NA	NA	NA	NA	NA	NA	NA	NA	NA	NA	NA	NA	NA	NA
125	125_5	neg	neg	3	adult	MB	VD	68.8	193.1	5759	29	4.7	13.3	NA	NA	NA	NA	NA	NA	NA	NA	NA	NA	NA	NA	NA	NA	NA	NA	NA	NA	NA	NA	NA	NA	NA	NA
126	126_1	neg	neg	3	adult	HO	VD	21.3	45.9	5872	373	3.8	8.1	rearing	16	small	buying	Stable_Pen	no	public	1	1	0	0	0	>50	open	don't_know	NA	0	0	0	0	0	0	0	1
126	126_2	neg	neg	4	adult	HO	VD	21.3	45.9	5872	373	3.8	8.1	rearing	16	small	buying	Stable_Pen	no	public	1	1	0	0	0	>50	open	don't_know	NA	0	0	0	0	0	0	0	1
126	126_3	neg	neg	4	adult	HO	VD	21.3	45.9	5872	373	3.8	8.1	rearing	16	small	buying	Stable_Pen	no	public	1	1	0	0	0	>50	open	don't_know	NA	0	0	0	0	0	0	0	1
126	126_4	neg	neg	7	adult	HO	VD	21.3	45.9	5872	373	3.8	8.1	rearing	16	small	buying	Stable_Pen	no	public	1	1	0	0	0	>50	open	don't_know	NA	0	0	0	0	0	0	0	1
126	126_5	neg	neg	8	adult	HO	VD	21.3	45.9	5872	373	3.8	8.1	rearing	16	small	buying	Stable_Pen	no	public	1	1	0	0	0	>50	open	don't_know	NA	0	0	0	0	0	0	0	1
127	127_1	neg	neg	8	adult	RH	VD	94.6	47.9	5511	146	17.3	8.7	dairy+beef	28	medium	heifer_rearing	Stable_Pen_Pasture	partly	ground	1	1	1	1	1	<25	open	1	2	0	0	0	0	0	0	1	1
127	127_2	neg	neg	3	adult	SF	VD	94.6	47.9	5511	146	17.3	8.7	dairy+beef	28	medium	heifer_rearing	Stable_Pen_Pasture	partly	ground	1	1	1	1	1	<25	open	1	2	0	0	0	0	0	0	1	1
127	127_3	neg	neg	2	adult	MIX	VD	94.6	47.9	5511	146	17.3	8.7	dairy+beef	28	medium	heifer_rearing	Stable_Pen_Pasture	partly	ground	1	1	1	1	1	<25	open	1	2	0	0	0	0	0	0	1	1
127	127_4	neg	neg	9	adult	Mix	VD	94.6	47.9	5511	146	17.3	8.7	dairy+beef	28	medium	heifer_rearing	Stable_Pen_Pasture	partly	ground	1	1	1	1	1	<25	open	1	2	0	0	0	0	0	0	1	1
127	127_5	neg	neg	5	adult	HO	VD	94.6	47.9	5511	146	17.3	8.7	dairy+beef	28	medium	heifer_rearing	Stable_Pen_Pasture	partly	ground	1	1	1	1	1	<25	open	1	2	0	0	0	0	0	0	1	1
128	128_1	neg	neg	5	adult	MB	VD	27.5	10.2	5749	338	17.5	6.5	NA	NA	NA	NA	NA	NA	NA	NA	NA	NA	NA	NA	NA	NA	NA	NA	NA	NA	NA	NA	NA	NA	NA	NA
128	128_2	neg	neg	5	adult	MB	VD	27.5	10.2	5749	338	17.5	6.5	NA	NA	NA	NA	NA	NA	NA	NA	NA	NA	NA	NA	NA	NA	NA	NA	NA	NA	NA	NA	NA	NA	NA	NA
128	128_3	neg	neg	4	adult	MB	VD	27.5	10.2	5749	338	17.5	6.5	NA	NA	NA	NA	NA	NA	NA	NA	NA	NA	NA	NA	NA	NA	NA	NA	NA	NA	NA	NA	NA	NA	NA	NA
128	128_4	neg	neg	8	adult	MB	VD	27.5	10.2	5749	338	17.5	6.5	NA	NA	NA	NA	NA	NA	NA	NA	NA	NA	NA	NA	NA	NA	NA	NA	NA	NA	NA	NA	NA	NA	NA	NA
128	128_5	neg	neg	9	adult	MB	VD	27.5	10.2	5749	338	17.5	6.5	NA	NA	NA	NA	NA	NA	NA	NA	NA	NA	NA	NA	NA	NA	NA	NA	NA	NA	NA	NA	NA	NA	NA	NA
129	129_1	neg	neg	5	adult	HO	VD	70.5	31.6	5675	958	49.7	22.3	dairy	80	large	buying	Stable_Pen_Pasture	partly	public	1	1	1	1	1	25to50	open	1	NA	1	0	1	0	0	0	0	1
129	129_2	neg	neg	7	adult	RH	VD	70.5	31.6	5675	958	49.7	22.3	dairy	80	large	buying	Stable_Pen_Pasture	partly	public	1	1	1	1	1	25to50	open	1	NA	1	0	1	0	0	0	0	1
129	129_3	neg	neg	2	adult	RH	VD	70.5	31.6	5675	958	49.7	22.3	dairy	80	large	buying	Stable_Pen_Pasture	partly	public	1	1	1	1	1	25to50	open	1	NA	1	0	1	0	0	0	0	1
130	130_1	neg	neg	4	adult	RH	VD	70.5	31.6	5675	958	49.7	22.3	NA	NA	NA	NA	NA	NA	NA	NA	NA	NA	NA	NA	NA	NA	NA	NA	NA	NA	NA	NA	NA	NA	NA	NA
130	130_2	neg	neg	4	adult	RH	VD	70.5	31.6	5675	958	49.7	22.3	NA	NA	NA	NA	NA	NA	NA	NA	NA	NA	NA	NA	NA	NA	NA	NA	NA	NA	NA	NA	NA	NA	NA	NA
130	130_3	neg	neg	4	adult	HO	VD	70.5	31.6	5675	958	49.7	22.3	NA	NA	NA	NA	NA	NA	NA	NA	NA	NA	NA	NA	NA	NA	NA	NA	NA	NA	NA	NA	NA	NA	NA	NA
130	130_4	neg	neg	5	adult	RH	VD	70.5	31.6	5675	958	49.7	22.3	NA	NA	NA	NA	NA	NA	NA	NA	NA	NA	NA	NA	NA	NA	NA	NA	NA	NA	NA	NA	NA	NA	NA	NA
130	130_5	neg	neg	6	adult	RF	VD	70.5	31.6	5675	958	49.7	22.3	NA	NA	NA	NA	NA	NA	NA	NA	NA	NA	NA	NA	NA	NA	NA	NA	NA	NA	NA	NA	NA	NA	NA	NA
131	131_1	neg	pos	3	adult	RH	JU	91.9	316.7	6753	93	5.5	19	rearing	14	small	heifer_rearing	Stable_Pen_Pasture	yes	ground	1	1	1	0	1	25to50	open	1	10	1	1	1	0	0	0	1	1
131	131_2	neg	pos	4	adult	JY	JU	91.9	316.7	6753	93	5.5	19	rearing	14	small	heifer_rearing	Stable_Pen_Pasture	yes	ground	1	1	1	0	1	25to50	open	1	10	1	1	1	0	0	0	1	1
131	131_3	pos	pos	3	adult	RH	JU	91.9	316.7	6753	93	5.5	19	rearing	14	small	heifer_rearing	Stable_Pen_Pasture	yes	ground	1	1	1	0	1	25to50	open	1	10	1	1	1	0	0	0	1	1
131	131_4	pos	pos	4	adult	RH	JU	91.9	316.7	6753	93	5.5	19	rearing	14	small	heifer_rearing	Stable_Pen_Pasture	yes	ground	1	1	1	0	1	25to50	open	1	10	1	1	1	0	0	0	1	1
131	131_5	pos	pos	2	adult	RH	JU	91.9	316.7	6753	93	5.5	19	rearing	14	small	heifer_rearing	Stable_Pen_Pasture	yes	ground	1	1	1	0	1	25to50	open	1	10	1	1	1	0	0	0	1	1
132	132_1	neg	neg	7	adult	RH	JU	110.7	399.1	6741	94	8	29	NA	NA	NA	NA	NA	NA	NA	NA	NA	NA	NA	NA	NA	NA	NA	NA	NA	NA	NA	NA	NA	NA	NA	NA
132	132_2	neg	neg	2	adult	RH	JU	110.7	399.1	6741	94	8	29	NA	NA	NA	NA	NA	NA	NA	NA	NA	NA	NA	NA	NA	NA	NA	NA	NA	NA	NA	NA	NA	NA	NA	NA
132	132_3	neg	neg	8	adult	RH	JU	110.7	399.1	6741	94	8	29	NA	NA	NA	NA	NA	NA	NA	NA	NA	NA	NA	NA	NA	NA	NA	NA	NA	NA	NA	NA	NA	NA	NA	NA
132	132_4	neg	neg	6	adult	RH	JU	110.7	399.1	6741	94	8	29	NA	NA	NA	NA	NA	NA	NA	NA	NA	NA	NA	NA	NA	NA	NA	NA	NA	NA	NA	NA	NA	NA	NA	NA
132	132_5	neg	neg	5	adult	RF	JU	110.7	399.1	6741	94	8	29	NA	NA	NA	NA	NA	NA	NA	NA	NA	NA	NA	NA	NA	NA	NA	NA	NA	NA	NA	NA	NA	NA	NA	NA
133	133_1	neg	neg	5	adult	HO	JU	58.9	69.6	6790	239	12	14.1	dairy	25	medium	heifer_rearing	Stable_Pen	no	ground	1	1	0	0	1	25to50	closed	1	2	1	0	0	0	0	0	0	1
133	133_2	neg	neg	3	adult	HO	JU	58.9	69.6	6790	239	12	14.1	dairy	25	medium	heifer_rearing	Stable_Pen	no	ground	1	1	0	0	1	25to50	closed	1	2	1	0	0	0	0	0	0	1
133	133_3	neg	neg	5	adult	HO	JU	58.9	69.6	6790	239	12	14.1	dairy	25	medium	heifer_rearing	Stable_Pen	no	ground	1	1	0	0	1	25to50	closed	1	2	1	0	0	0	0	0	0	1
133	133_4	neg	neg	7	adult	HO	JU	58.9	69.6	6790	239	12	14.1	dairy	25	medium	heifer_rearing	Stable_Pen	no	ground	1	1	0	0	1	25to50	closed	1	2	1	0	0	0	0	0	0	1
133	133_5	neg	neg	4	adult	HO	JU	58.9	69.6	6790	239	12	14.1	dairy	25	medium	heifer_rearing	Stable_Pen	no	ground	1	1	0	0	1	25to50	closed	1	2	1	0	0	0	0	0	0	1
134	134_1	neg	neg	3	adult	RH	JU	75	383.4	6719	54	3	15.5	NA	NA	NA	NA	NA	NA	NA	NA	NA	NA	NA	NA	NA	NA	NA	NA	NA	NA	NA	NA	NA	NA	NA	NA
134	134_2	neg	neg	3	adult	RH	JU	75	383.4	6719	54	3	15.5	NA	NA	NA	NA	NA	NA	NA	NA	NA	NA	NA	NA	NA	NA	NA	NA	NA	NA	NA	NA	NA	NA	NA	NA
134	134_3	neg	neg	8	adult	RH	JU	75	383.4	6719	54	3	15.5	NA	NA	NA	NA	NA	NA	NA	NA	NA	NA	NA	NA	NA	NA	NA	NA	NA	NA	NA	NA	NA	NA	NA	NA
134	134_4	neg	neg	7	adult	HO	JU	75	383.4	6719	54	3	15.5	NA	NA	NA	NA	NA	NA	NA	NA	NA	NA	NA	NA	NA	NA	NA	NA	NA	NA	NA	NA	NA	NA	NA	NA
134	134_5	neg	neg	12	adult	BV	JU	75	383.4	6719	54	3	15.5	NA	NA	NA	NA	NA	NA	NA	NA	NA	NA	NA	NA	NA	NA	NA	NA	NA	NA	NA	NA	NA	NA	NA	NA
135	135_1	neg	neg	5	adult	BV	JU	45.7	99.1	6716	15	6.4	13.9	NA	NA	NA	NA	NA	NA	NA	NA	NA	NA	NA	NA	NA	NA	NA	NA	NA	NA	NA	NA	NA	NA	NA	NA
135	135_2	neg	neg	4	adult	BV	JU	45.7	99.1	6716	15	6.4	13.9	NA	NA	NA	NA	NA	NA	NA	NA	NA	NA	NA	NA	NA	NA	NA	NA	NA	NA	NA	NA	NA	NA	NA	NA
135	135_3	neg	neg	3	adult	BV	JU	45.7	99.1	6716	15	6.4	13.9	NA	NA	NA	NA	NA	NA	NA	NA	NA	NA	NA	NA	NA	NA	NA	NA	NA	NA	NA	NA	NA	NA	NA	NA
136	136_1	neg	neg	3	adult	RH	JU	59.1	288.9	6808	205	3.3	16.2	NA	NA	NA	NA	NA	NA	NA	NA	NA	NA	NA	NA	NA	NA	NA	NA	NA	NA	NA	NA	NA	NA	NA	NA
136	136_2	neg	neg	4	adult	RH	JU	59.1	288.9	6808	205	3.3	16.2	NA	NA	NA	NA	NA	NA	NA	NA	NA	NA	NA	NA	NA	NA	NA	NA	NA	NA	NA	NA	NA	NA	NA	NA
136	136_3	neg	neg	8	adult	RH	JU	59.1	288.9	6808	205	3.3	16.2	NA	NA	NA	NA	NA	NA	NA	NA	NA	NA	NA	NA	NA	NA	NA	NA	NA	NA	NA	NA	NA	NA	NA	NA
137	137_1	neg	neg	2	adult	RH	NE	71.6	480	6432	76	1.8	12.2	NA	NA	NA	NA	NA	NA	NA	NA	NA	NA	NA	NA	NA	NA	NA	NA	NA	NA	NA	NA	NA	NA	NA	NA
137	137_2	neg	neg	5	adult	RH	NE	71.6	480	6432	76	1.8	12.2	NA	NA	NA	NA	NA	NA	NA	NA	NA	NA	NA	NA	NA	NA	NA	NA	NA	NA	NA	NA	NA	NA	NA	NA
137	137_3	neg	neg	4	adult	RH	NE	71.6	480	6432	76	1.8	12.2	NA	NA	NA	NA	NA	NA	NA	NA	NA	NA	NA	NA	NA	NA	NA	NA	NA	NA	NA	NA	NA	NA	NA	NA
137	137_4	neg	neg	7	adult	RH	NE	71.6	480	6432	76	1.8	12.2	NA	NA	NA	NA	NA	NA	NA	NA	NA	NA	NA	NA	NA	NA	NA	NA	NA	NA	NA	NA	NA	NA	NA	NA
138	138_1	neg	neg	3	adult	RH	NE	71.6	480	6432	76	1.8	12.2	dairy	50	large	heifer_rearing	Stable_Pasture	no	ground	1	1	0	0	1	25to50	closed	1	NA	0	1	1	0	0	0	0	0
138	138_2	neg	neg	4	adult	RH	NE	71.6	480	6432	76	1.8	12.2	dairy	50	large	heifer_rearing	Stable_Pasture	no	ground	1	1	0	0	1	25to50	closed	1	NA	0	1	1	0	0	0	0	0
138	138_3	neg	neg	2	adult	RH	NE	71.6	480	6432	76	1.8	12.2	dairy	50	large	heifer_rearing	Stable_Pasture	no	ground	1	1	0	0	1	25to50	closed	1	NA	0	1	1	0	0	0	0	0
138	138_4	neg	neg	2	adult	RH	NE	71.6	480	6432	76	1.8	12.2	dairy	50	large	heifer_rearing	Stable_Pasture	no	ground	1	1	0	0	1	25to50	closed	1	NA	0	1	1	0	0	0	0	0
138	138_5	neg	neg	11	adult	RH	NE	71.6	480	6432	76	1.8	12.2	dairy	50	large	heifer_rearing	Stable_Pasture	no	ground	1	1	0	0	1	25to50	closed	1	NA	0	1	1	0	0	0	0	0
139	139_1	neg	neg	4	adult	MB	NE	73.6	369	6434	41	2.6	13.1	dairy	40	large	heifer_rearing	Stable_Pasture	yes	public	1	1	0	0	0	>50	closed	1	5	1	1	1	0	0	0	0	1
139	139_2	neg	neg	6	adult	RH	NE	73.6	369	6434	41	2.6	13.1	dairy	40	large	heifer_rearing	Stable_Pasture	yes	public	1	1	0	0	0	>50	closed	1	5	1	1	1	0	0	0	0	1
139	139_3	neg	neg	6	adult	MIX	NE	73.6	369	6434	41	2.6	13.1	dairy	40	large	heifer_rearing	Stable_Pasture	yes	public	1	1	0	0	0	>50	closed	1	5	1	1	1	0	0	0	0	1
139	139_4	neg	neg	2	adult	MIX	NE	73.6	369	6434	41	2.6	13.1	dairy	40	large	heifer_rearing	Stable_Pasture	yes	public	1	1	0	0	0	>50	closed	1	5	1	1	1	0	0	0	0	1
139	139_5	neg	neg	6	adult	MIX	NE	73.6	369	6434	41	2.6	13.1	dairy	40	large	heifer_rearing	Stable_Pasture	yes	public	1	1	0	0	0	>50	closed	1	5	1	1	1	0	0	0	0	1
140	140_1	neg	neg	NA	adult	NA	NE	73.6	369	6434	41	2.6	13.1	NA	NA	NA	NA	NA	NA	NA	NA	NA	NA	NA	NA	NA	NA	NA	NA	NA	NA	NA	NA	NA	NA	NA	NA
140	140_2	neg	neg	6	adult	RH	NE	73.6	369	6434	41	2.6	13.1	NA	NA	NA	NA	NA	NA	NA	NA	NA	NA	NA	NA	NA	NA	NA	NA	NA	NA	NA	NA	NA	NA	NA	NA
140	140_3	neg	neg	3	adult	RH	NE	73.6	369	6434	41	2.6	13.1	NA	NA	NA	NA	NA	NA	NA	NA	NA	NA	NA	NA	NA	NA	NA	NA	NA	NA	NA	NA	NA	NA	NA	NA
140	140_4	neg	neg	3	adult	rh	NE	73.6	369	6434	41	2.6	13.1	NA	NA	NA	NA	NA	NA	NA	NA	NA	NA	NA	NA	NA	NA	NA	NA	NA	NA	NA	NA	NA	NA	NA	NA
141	141_1	neg	neg	5	adult	SF	NE	62.6	210.9	6435	61	3.5	11.9	NA	NA	NA	NA	NA	NA	NA	NA	NA	NA	NA	NA	NA	NA	NA	NA	NA	NA	NA	NA	NA	NA	NA	NA
141	141_2	neg	neg	8	adult	RH	NE	62.6	210.9	6435	61	3.5	11.9	NA	NA	NA	NA	NA	NA	NA	NA	NA	NA	NA	NA	NA	NA	NA	NA	NA	NA	NA	NA	NA	NA	NA	NA
141	141_3	neg	neg	5	adult	SF	NE	62.6	210.9	6435	61	3.5	11.9	NA	NA	NA	NA	NA	NA	NA	NA	NA	NA	NA	NA	NA	NA	NA	NA	NA	NA	NA	NA	NA	NA	NA	NA
141	141_4	neg	neg	3	adult	SF	NE	62.6	210.9	6435	61	3.5	11.9	NA	NA	NA	NA	NA	NA	NA	NA	NA	NA	NA	NA	NA	NA	NA	NA	NA	NA	NA	NA	NA	NA	NA	NA
141	141_5	neg	neg	6	adult	RH	NE	62.6	210.9	6435	61	3.5	11.9	NA	NA	NA	NA	NA	NA	NA	NA	NA	NA	NA	NA	NA	NA	NA	NA	NA	NA	NA	NA	NA	NA	NA	NA
142	142_1	neg	neg	3	adult	RH	JU	59.3	361.5	716	83	3.5	21.2	NA	NA	NA	NA	NA	NA	NA	NA	NA	NA	NA	NA	NA	NA	NA	NA	NA	NA	NA	NA	NA	NA	NA	NA
142	142_2	neg	neg	4	adult	RH	JU	59.3	361.5	716	83	3.5	21.2	NA	NA	NA	NA	NA	NA	NA	NA	NA	NA	NA	NA	NA	NA	NA	NA	NA	NA	NA	NA	NA	NA	NA	NA
142	142_3	neg	neg	2	adult	RH	JU	59.3	361.5	716	83	3.5	21.2	NA	NA	NA	NA	NA	NA	NA	NA	NA	NA	NA	NA	NA	NA	NA	NA	NA	NA	NA	NA	NA	NA	NA	NA
142	142_4	neg	neg	7	adult	RH	JU	59.3	361.5	716	83	3.5	21.2	NA	NA	NA	NA	NA	NA	NA	NA	NA	NA	NA	NA	NA	NA	NA	NA	NA	NA	NA	NA	NA	NA	NA	NA
143	143_1	neg	neg	1	1y	HO	FR	105.2	98	2155	138	13.7	12.7	NA	NA	NA	NA	NA	NA	NA	NA	NA	NA	NA	NA	NA	NA	NA	NA	NA	NA	NA	NA	NA	NA	NA	NA
143	143_2	neg	neg	2	adult	RH	FR	105.2	98	2155	138	13.7	12.7	NA	NA	NA	NA	NA	NA	NA	NA	NA	NA	NA	NA	NA	NA	NA	NA	NA	NA	NA	NA	NA	NA	NA	NA
143	143_3	neg	neg	1	1y	HO	FR	105.2	98	2155	138	13.7	12.7	NA	NA	NA	NA	NA	NA	NA	NA	NA	NA	NA	NA	NA	NA	NA	NA	NA	NA	NA	NA	NA	NA	NA	NA
143	143_4	neg	neg	1	1y	HO	FR	105.2	98	2155	138	13.7	12.7	NA	NA	NA	NA	NA	NA	NA	NA	NA	NA	NA	NA	NA	NA	NA	NA	NA	NA	NA	NA	NA	NA	NA	NA
143	143_5	neg	neg	2	adult	HO	FR	105.2	98	2155	138	13.7	12.7	NA	NA	NA	NA	NA	NA	NA	NA	NA	NA	NA	NA	NA	NA	NA	NA	NA	NA	NA	NA	NA	NA	NA	NA
144	144_1	neg	neg	4	adult	SI	FR	65.9	121.3	2299	326	4.9	9	NA	NA	NA	NA	NA	NA	NA	NA	NA	NA	NA	NA	NA	NA	NA	NA	NA	NA	NA	NA	NA	NA	NA	NA
144	144_2	neg	neg	4	adult	SI	FR	65.9	121.3	2299	326	4.9	9	NA	NA	NA	NA	NA	NA	NA	NA	NA	NA	NA	NA	NA	NA	NA	NA	NA	NA	NA	NA	NA	NA	NA	NA
144	144_3	neg	neg	4	adult	SI	FR	65.9	121.3	2299	326	4.9	9	NA	NA	NA	NA	NA	NA	NA	NA	NA	NA	NA	NA	NA	NA	NA	NA	NA	NA	NA	NA	NA	NA	NA	NA
144	144_4	neg	neg	5	adult	SI	FR	65.9	121.3	2299	326	4.9	9	NA	NA	NA	NA	NA	NA	NA	NA	NA	NA	NA	NA	NA	NA	NA	NA	NA	NA	NA	NA	NA	NA	NA	NA
145	145_1	pos	pos	6	adult	RF	FR	40.6	63.1	2137	110	10.4	16.2	NA	NA	NA	NA	NA	NA	NA	NA	NA	NA	NA	NA	NA	NA	NA	NA	NA	NA	NA	NA	NA	NA	NA	NA
145	145_2	neg	pos	6	adult	RH	FR	40.6	63.1	2137	110	10.4	16.2	NA	NA	NA	NA	NA	NA	NA	NA	NA	NA	NA	NA	NA	NA	NA	NA	NA	NA	NA	NA	NA	NA	NA	NA
145	145_3	neg	pos	5	adult	RH	FR	40.6	63.1	2137	110	10.4	16.2	NA	NA	NA	NA	NA	NA	NA	NA	NA	NA	NA	NA	NA	NA	NA	NA	NA	NA	NA	NA	NA	NA	NA	NA
145	145_4	neg	pos	5	adult	RH	FR	40.6	63.1	2137	110	10.4	16.2	NA	NA	NA	NA	NA	NA	NA	NA	NA	NA	NA	NA	NA	NA	NA	NA	NA	NA	NA	NA	NA	NA	NA	NA
146	146_1	neg	neg	NA	adult	NA	FR	102.2	46.3	2102	300	20.1	9.1	NA	NA	NA	NA	NA	NA	NA	NA	NA	NA	NA	NA	NA	NA	NA	NA	NA	NA	NA	NA	NA	NA	NA	NA
146	146_2	neg	neg	NA	adult	NA	FR	102.2	46.3	2102	300	20.1	9.1	NA	NA	NA	NA	NA	NA	NA	NA	NA	NA	NA	NA	NA	NA	NA	NA	NA	NA	NA	NA	NA	NA	NA	NA
146	146_3	neg	neg	NA	adult	NA	FR	102.2	46.3	2102	300	20.1	9.1	NA	NA	NA	NA	NA	NA	NA	NA	NA	NA	NA	NA	NA	NA	NA	NA	NA	NA	NA	NA	NA	NA	NA	NA
146	146_4	neg	neg	NA	adult	NA	FR	102.2	46.3	2102	300	20.1	9.1	NA	NA	NA	NA	NA	NA	NA	NA	NA	NA	NA	NA	NA	NA	NA	NA	NA	NA	NA	NA	NA	NA	NA	NA
146	146_5	neg	neg	NA	adult	NA	FR	102.2	46.3	2102	300	20.1	9.1	NA	NA	NA	NA	NA	NA	NA	NA	NA	NA	NA	NA	NA	NA	NA	NA	NA	NA	NA	NA	NA	NA	NA	NA
147	147_1	neg	neg	7	adult	RF	FR	109.2	234.4	2067	76	10.1	21.8	NA	NA	NA	NA	NA	NA	NA	NA	NA	NA	NA	NA	NA	NA	NA	NA	NA	NA	NA	NA	NA	NA	NA	NA
147	147_2	neg	neg	4	adult	BV	FR	109.2	234.4	2067	76	10.1	21.8	NA	NA	NA	NA	NA	NA	NA	NA	NA	NA	NA	NA	NA	NA	NA	NA	NA	NA	NA	NA	NA	NA	NA	NA
147	147_3	neg	neg	4	adult	SF	FR	109.2	234.4	2067	76	10.1	21.8	NA	NA	NA	NA	NA	NA	NA	NA	NA	NA	NA	NA	NA	NA	NA	NA	NA	NA	NA	NA	NA	NA	NA	NA
147	147_4	neg	neg	4	adult	RH	FR	109.2	234.4	2067	76	10.1	21.8	NA	NA	NA	NA	NA	NA	NA	NA	NA	NA	NA	NA	NA	NA	NA	NA	NA	NA	NA	NA	NA	NA	NA	NA
148	148_1	neg	neg	4	adult	SF	FR	51.9	13.4	2183	168	23.2	6	NA	NA	NA	NA	NA	NA	NA	NA	NA	NA	NA	NA	NA	NA	NA	NA	NA	NA	NA	NA	NA	NA	NA	NA
148	148_2	neg	neg	3	adult	HO	FR	51.9	13.4	2183	168	23.2	6	NA	NA	NA	NA	NA	NA	NA	NA	NA	NA	NA	NA	NA	NA	NA	NA	NA	NA	NA	NA	NA	NA	NA	NA
148	148_3	neg	neg	3	adult	RH	FR	51.9	13.4	2183	168	23.2	6	NA	NA	NA	NA	NA	NA	NA	NA	NA	NA	NA	NA	NA	NA	NA	NA	NA	NA	NA	NA	NA	NA	NA	NA
148	148_4	neg	neg	10	adult	rf	FR	51.9	13.4	2183	168	23.2	6	NA	NA	NA	NA	NA	NA	NA	NA	NA	NA	NA	NA	NA	NA	NA	NA	NA	NA	NA	NA	NA	NA	NA	NA
148	148_5	neg	neg	3	adult	HO	FR	51.9	13.4	2183	168	23.2	6	NA	NA	NA	NA	NA	NA	NA	NA	NA	NA	NA	NA	NA	NA	NA	NA	NA	NA	NA	NA	NA	NA	NA	NA
149	149_1	neg	neg	3	adult	SI	FR	89	58.3	2296	107	11.7	7.7	dairy+beef	30	medium	heifer_rearing	Stable_Pen_Pasture	yes	ground	1	1	0	1	1	<25	open	1	NA	0	0	0	0	0	0	0	1
149	149_2	neg	neg	3	adult	SI	FR	89	58.3	2296	107	11.7	7.7	dairy+beef	30	medium	heifer_rearing	Stable_Pen_Pasture	yes	ground	1	1	0	1	1	<25	open	1	NA	0	0	0	0	0	0	0	1
149	149_3	neg	neg	4	adult	SI	FR	89	58.3	2296	107	11.7	7.7	dairy+beef	30	medium	heifer_rearing	Stable_Pen_Pasture	yes	ground	1	1	0	1	1	<25	open	1	NA	0	0	0	0	0	0	0	1
149	149_4	neg	neg	6	adult	SI	FR	89	58.3	2296	107	11.7	7.7	dairy+beef	30	medium	heifer_rearing	Stable_Pen_Pasture	yes	ground	1	1	0	1	1	<25	open	1	NA	0	0	0	0	0	0	0	1
149	149_5	neg	neg	6	adult	si	FR	89	58.3	2296	107	11.7	7.7	dairy+beef	30	medium	heifer_rearing	Stable_Pen_Pasture	yes	ground	1	1	0	1	1	<25	open	1	NA	0	0	0	0	0	0	0	1
150	150_1	neg	neg	3	adult	HO	FR	93.8	68.3	2097	178	15.9	11.6	NA	NA	NA	NA	NA	NA	NA	NA	NA	NA	NA	NA	NA	NA	NA	NA	NA	NA	NA	NA	NA	NA	NA	NA
150	150_2	neg	neg	2	adult	HO	FR	93.8	68.3	2097	178	15.9	11.6	NA	NA	NA	NA	NA	NA	NA	NA	NA	NA	NA	NA	NA	NA	NA	NA	NA	NA	NA	NA	NA	NA	NA	NA
150	150_3	neg	neg	3	adult	HO	FR	93.8	68.3	2097	178	15.9	11.6	NA	NA	NA	NA	NA	NA	NA	NA	NA	NA	NA	NA	NA	NA	NA	NA	NA	NA	NA	NA	NA	NA	NA	NA
150	150_4	neg	neg	4	adult	HO	FR	93.8	68.3	2097	178	15.9	11.6	NA	NA	NA	NA	NA	NA	NA	NA	NA	NA	NA	NA	NA	NA	NA	NA	NA	NA	NA	NA	NA	NA	NA	NA
151	151_1	neg	neg	3	adult	HO	FR	88.7	17.8	2096	305	28	5.6	NA	NA	NA	NA	NA	NA	NA	NA	NA	NA	NA	NA	NA	NA	NA	NA	NA	NA	NA	NA	NA	NA	NA	NA
151	151_2	neg	neg	8	adult	HO	FR	88.7	17.8	2096	305	28	5.6	NA	NA	NA	NA	NA	NA	NA	NA	NA	NA	NA	NA	NA	NA	NA	NA	NA	NA	NA	NA	NA	NA	NA	NA
151	151_3	neg	neg	3	adult	HO	FR	88.7	17.8	2096	305	28	5.6	NA	NA	NA	NA	NA	NA	NA	NA	NA	NA	NA	NA	NA	NA	NA	NA	NA	NA	NA	NA	NA	NA	NA	NA
151	151_4	neg	neg	6	adult	HO	FR	88.7	17.8	2096	305	28	5.6	NA	NA	NA	NA	NA	NA	NA	NA	NA	NA	NA	NA	NA	NA	NA	NA	NA	NA	NA	NA	NA	NA	NA	NA
151	151_5	neg	neg	9	adult	HO	FR	88.7	17.8	2096	305	28	5.6	NA	NA	NA	NA	NA	NA	NA	NA	NA	NA	NA	NA	NA	NA	NA	NA	NA	NA	NA	NA	NA	NA	NA	NA
152	152_1	neg	neg	3	adult	RH	SH	18.3	13.6	2904	201	11.2	8.4	dairy+rearing	60	large	buying	Stable_Pen_Pasture	partly	public	1	1	1	1	1	25to50	open	1	5	1	1	1	0	0	0	0	1
152	152_2	neg	neg	3	adult	BV	SH	18.3	13.6	2904	201	11.2	8.4	dairy+rearing	60	large	buying	Stable_Pen_Pasture	partly	public	1	1	1	1	1	25to50	open	1	5	1	1	1	0	0	0	0	1
152	152_3	neg	neg	3	adult	HO	SH	18.3	13.6	2904	201	11.2	8.4	dairy+rearing	60	large	buying	Stable_Pen_Pasture	partly	public	1	1	1	1	1	25to50	open	1	5	1	1	1	0	0	0	0	1
152	152_4	neg	neg	2	adult	RH	SH	18.3	13.6	2904	201	11.2	8.4	dairy+rearing	60	large	buying	Stable_Pen_Pasture	partly	public	1	1	1	1	1	25to50	open	1	5	1	1	1	0	0	0	0	1
152	152_5	neg	neg	4	adult	BV	SH	18.3	13.6	2904	201	11.2	8.4	dairy+rearing	60	large	buying	Stable_Pen_Pasture	partly	public	1	1	1	1	1	25to50	open	1	5	1	1	1	0	0	0	0	1
153	153_1	neg	neg	3	adult	RH	TG	67.8	106	4816	213	8.8	13.8	dairy+beef	32	medium	heifer_rearing	Stable_Pen_Pasture	no	public	1	1	1	1	1	25to50	closed	0	0	0	0	1	0	0	0	1	1
153	153_2	neg	neg	3	adult	NA	TG	67.8	106	4816	213	8.8	13.8	dairy+beef	32	medium	heifer_rearing	Stable_Pen_Pasture	no	public	1	1	1	1	1	25to50	closed	0	0	0	0	1	0	0	0	1	1
153	153_3	neg	neg	5	adult	SF	TG	67.8	106	4816	213	8.8	13.8	dairy+beef	32	medium	heifer_rearing	Stable_Pen_Pasture	no	public	1	1	1	1	1	25to50	closed	0	0	0	0	1	0	0	0	1	1
153	153_4	neg	neg	6	adult	RH	TG	67.8	106	4816	213	8.8	13.8	dairy+beef	32	medium	heifer_rearing	Stable_Pen_Pasture	no	public	1	1	1	1	1	25to50	closed	0	0	0	0	1	0	0	0	1	1
154	154_1	neg	neg	9	adult	MIX	TG	101.7	116.5	4723	96	10.5	12	NA	NA	NA	NA	NA	NA	NA	NA	NA	NA	NA	NA	NA	NA	NA	NA	NA	NA	NA	NA	NA	NA	NA	NA
154	154_2	neg	neg	5	adult	HO	TG	101.7	116.5	4723	96	10.5	12	NA	NA	NA	NA	NA	NA	NA	NA	NA	NA	NA	NA	NA	NA	NA	NA	NA	NA	NA	NA	NA	NA	NA	NA
154	154_3	neg	neg	5	adult	HO	TG	101.7	116.5	4723	96	10.5	12	NA	NA	NA	NA	NA	NA	NA	NA	NA	NA	NA	NA	NA	NA	NA	NA	NA	NA	NA	NA	NA	NA	NA	NA
154	154_4	neg	neg	4	adult	RH	TG	101.7	116.5	4723	96	10.5	12	NA	NA	NA	NA	NA	NA	NA	NA	NA	NA	NA	NA	NA	NA	NA	NA	NA	NA	NA	NA	NA	NA	NA	NA
154	154_5	neg	neg	3	adult	HO	TG	101.7	116.5	4723	96	10.5	12	NA	NA	NA	NA	NA	NA	NA	NA	NA	NA	NA	NA	NA	NA	NA	NA	NA	NA	NA	NA	NA	NA	NA	NA
155	155_1	neg	neg	4	adult	RH	TG	120.6	157.1	4756	119	10.9	14.2	dairy	20	small	heifer_rearing	Stable_Pasture	yes	ground	1	1	1	1	1	25to50	closed	1	3	0	0	0	0	0	0	1	1
155	155_2	neg	neg	2	adult	BV	TG	120.6	157.1	4756	119	10.9	14.2	dairy	20	small	heifer_rearing	Stable_Pasture	yes	ground	1	1	1	1	1	25to50	closed	1	3	0	0	0	0	0	0	1	1
155	155_3	neg	neg	2	adult	HO	TG	120.6	157.1	4756	119	10.9	14.2	dairy	20	small	heifer_rearing	Stable_Pasture	yes	ground	1	1	1	1	1	25to50	closed	1	3	0	0	0	0	0	0	1	1
155	155_4	neg	neg	8	adult	HO	TG	120.6	157.1	4756	119	10.9	14.2	dairy	20	small	heifer_rearing	Stable_Pasture	yes	ground	1	1	1	1	1	25to50	closed	1	3	0	0	0	0	0	0	1	1
155	155_5	neg	neg	5	adult	HO	TG	120.6	157.1	4756	119	10.9	14.2	dairy	20	small	heifer_rearing	Stable_Pasture	yes	ground	1	1	1	1	1	25to50	closed	1	3	0	0	0	0	0	0	1	1
156	156_1	neg	neg	6	adult	RH	TG	80.6	17.5	4571	268	27.5	6	dairy	19	small	heifer_rearing+buying	Stable_Pasture	no	ground	1	1	1	1	1	<25	closed	1	2	0	0	0	0	0	0	0	1
156	156_2	neg	neg	5	adult	RH	TG	80.6	17.5	4571	268	27.5	6	dairy	19	small	heifer_rearing+buying	Stable_Pasture	no	ground	1	1	1	1	1	<25	closed	1	2	0	0	0	0	0	0	0	1
156	156_3	neg	neg	2	adult	RH	TG	80.6	17.5	4571	268	27.5	6	dairy	19	small	heifer_rearing+buying	Stable_Pasture	no	ground	1	1	1	1	1	<25	closed	1	2	0	0	0	0	0	0	0	1
156	156_4	neg	neg	4	adult	RH	TG	80.6	17.5	4571	268	27.5	6	dairy	19	small	heifer_rearing+buying	Stable_Pasture	no	ground	1	1	1	1	1	<25	closed	1	2	0	0	0	0	0	0	0	1
156	156_5	neg	neg	3	adult	RH	TG	80.6	17.5	4571	268	27.5	6	dairy	19	small	heifer_rearing+buying	Stable_Pasture	no	ground	1	1	1	1	1	<25	closed	1	2	0	0	0	0	0	0	0	1
157	157_1	neg	neg	5	adult	RH	TG	87.9	67.1	4921	290	15.4	11.7	dairy	47	large	heifer_rearing	Stable_Pasture	partly	ground	1	1	0	1	1	25to50	closed	don't_know	NA	0	1	1	1	0	1	1	1
157	157_2	neg	neg	2	adult	RH	TG	87.9	67.1	4921	290	15.4	11.7	dairy	47	large	heifer_rearing	Stable_Pasture	partly	ground	1	1	0	1	1	25to50	closed	don't_know	NA	0	1	1	1	0	1	1	1
157	157_3	neg	neg	5	adult	MIX	TG	87.9	67.1	4921	290	15.4	11.7	dairy	47	large	heifer_rearing	Stable_Pasture	partly	ground	1	1	0	1	1	25to50	closed	don't_know	NA	0	1	1	1	0	1	1	1
157	157_4	neg	neg	3	adult	RH	TG	87.9	67.1	4921	290	15.4	11.7	dairy	47	large	heifer_rearing	Stable_Pasture	partly	ground	1	1	0	1	1	25to50	closed	don't_know	NA	0	1	1	1	0	1	1	1
157	157_5	neg	neg	3	adult	RH	TG	87.9	67.1	4921	290	15.4	11.7	dairy	47	large	heifer_rearing	Stable_Pasture	partly	ground	1	1	0	1	1	25to50	closed	don't_know	NA	0	1	1	1	0	1	1	1
158	158_1	neg	neg	3	adult	BV	TG	88.3	28.3	4476	343	28.1	9	dairy	46	large	heifer_rearing	Stable_Pen_Pasture	no	public_ground	1	1	0	0	0	<25	closed	1	2	0	0	0	0	0	0	1	1
158	158_2	neg	neg	4	adult	BV	TG	88.3	28.3	4476	343	28.1	9	dairy	46	large	heifer_rearing	Stable_Pen_Pasture	no	public_ground	1	1	0	0	0	<25	closed	1	2	0	0	0	0	0	0	1	1
158	158_3	neg	neg	2	adult	BV	TG	88.3	28.3	4476	343	28.1	9	dairy	46	large	heifer_rearing	Stable_Pen_Pasture	no	public_ground	1	1	0	0	0	<25	closed	1	2	0	0	0	0	0	0	1	1
158	158_4	neg	neg	5	adult	bv	TG	88.3	28.3	4476	343	28.1	9	dairy	46	large	heifer_rearing	Stable_Pen_Pasture	no	public_ground	1	1	0	0	0	<25	closed	1	2	0	0	0	0	0	0	1	1
158	158_5	neg	neg	5	adult	BV	TG	88.3	28.3	4476	343	28.1	9	dairy	46	large	heifer_rearing	Stable_Pen_Pasture	no	public_ground	1	1	0	0	0	<25	closed	1	2	0	0	0	0	0	0	1	1
159	159_1	neg	neg	4	adult	BV	UR	15.6	4.7	1213	214	13.1	4	dairy+beef	24	medium	heifer_rearing	Stable_Pen_Pasture	yes	public	1	1	1	1	1	25to50	closed	1	8	1	0	0	0	0	0	0	0
159	159_2	neg	neg	3	adult	bv	UR	15.6	4.7	1213	214	13.1	4	dairy+beef	24	medium	heifer_rearing	Stable_Pen_Pasture	yes	public	1	1	1	1	1	25to50	closed	1	8	1	0	0	0	0	0	0	0
159	159_3	neg	neg	5	adult	BV	UR	15.6	4.7	1213	214	13.1	4	dairy+beef	24	medium	heifer_rearing	Stable_Pen_Pasture	yes	public	1	1	1	1	1	25to50	closed	1	8	1	0	0	0	0	0	0	0
159	159_4	neg	neg	3	adult	OB	UR	15.6	4.7	1213	214	13.1	4	dairy+beef	24	medium	heifer_rearing	Stable_Pen_Pasture	yes	public	1	1	1	1	1	25to50	closed	1	8	1	0	0	0	0	0	0	0
159	159_5	neg	neg	3	adult	BV	UR	15.6	4.7	1213	214	13.1	4	dairy+beef	24	medium	heifer_rearing	Stable_Pen_Pasture	yes	public	1	1	1	1	1	25to50	closed	1	8	1	0	0	0	0	0	0	0
159	159_6	neg	neg	3	adult	BV	UR	15.6	4.7	1213	214	13.1	4	dairy+beef	24	medium	heifer_rearing	Stable_Pen_Pasture	yes	public	1	1	1	1	1	25to50	closed	1	8	1	0	0	0	0	0	0	0
160	160_1	neg	pos	8	adult	BV	TI	2.1	2.8	5269	300	11.8	15.6	NA	NA	NA	NA	NA	NA	NA	NA	NA	NA	NA	NA	NA	NA	NA	NA	NA	NA	NA	NA	NA	NA	NA	NA
160	160_2	pos	pos	15	adult	RH	TI	2.1	2.8	5269	300	11.8	15.6	NA	NA	NA	NA	NA	NA	NA	NA	NA	NA	NA	NA	NA	NA	NA	NA	NA	NA	NA	NA	NA	NA	NA	NA
160	160_3	neg	pos	6	adult	BV	TI	2.1	2.8	5269	300	11.8	15.6	NA	NA	NA	NA	NA	NA	NA	NA	NA	NA	NA	NA	NA	NA	NA	NA	NA	NA	NA	NA	NA	NA	NA	NA
160	160_4	neg	pos	5	adult	BV	TI	2.1	2.8	5269	300	11.8	15.6	NA	NA	NA	NA	NA	NA	NA	NA	NA	NA	NA	NA	NA	NA	NA	NA	NA	NA	NA	NA	NA	NA	NA	NA
161	161_5	neg	neg	4	adult	ER	VS	13.7	17.3	6024	701	8.2	10.3	NA	NA	NA	NA	NA	NA	NA	NA	NA	NA	NA	NA	NA	NA	NA	NA	NA	NA	NA	NA	NA	NA	NA	NA
161	161_1	neg	neg	4	adult	ER	VS	13.7	17.3	6024	701	8.2	10.3	NA	NA	NA	NA	NA	NA	NA	NA	NA	NA	NA	NA	NA	NA	NA	NA	NA	NA	NA	NA	NA	NA	NA	NA
161	161_2	neg	neg	10	adult	ER	VS	13.7	17.3	6024	701	8.2	10.3	NA	NA	NA	NA	NA	NA	NA	NA	NA	NA	NA	NA	NA	NA	NA	NA	NA	NA	NA	NA	NA	NA	NA	NA
161	161_3	neg	neg	8	adult	ER	VS	13.7	17.3	6024	701	8.2	10.3	NA	NA	NA	NA	NA	NA	NA	NA	NA	NA	NA	NA	NA	NA	NA	NA	NA	NA	NA	NA	NA	NA	NA	NA
